# Supplementary material for: Identification of QTL and candidate genes associated with biomass yield and Feed Quality in response to water deficit in alfalfa (Medicago sativa L.) using linkage mapping and RNA-Seq
Source: Front Plant Sci. 2022 Oct 17;13:996672. doi: 10.3389/fpls.2022.996672 (PMC9619099; doi:10.3389/fpls.2022.996672)
Supplement: Supplementary Table 3 — Information of four comparative groups (G1-G4). [file Table_3.xlsx]

## Sheet: G1
GeneID	log2FoldChange	Adjust Pvalue	up/down
MS.gene29752	6.09863	2.62068e-101	up
MS.gene064881	7.00822	1.25834e-94	up
MS.gene81679	6.26696	1.91733e-91	up
MS.gene89264	5.68861	5.6103e-87	up
MS.gene61273	11.245	1.94733e-69	up
MS.gene94257	5.75747	1.01547e-67	up
MS.gene010803	5.31414	1.49611e-66	up
MS.gene74690	2.67815	1.16042e-64	up
MS.gene027860	6.50716	7.22994e-64	up
MS.gene017992	3.71956	5.51372e-61	up
MS.gene97976	5.06008	5.8716e-61	up
MS.gene44862	5.52068	2.95709e-58	up
MS.gene32183	4.53918	1.36842e-56	up
MS.gene056483	6.08741	2.41417e-55	up
MS.gene54620	4.58903	3.55354e-54	up
MS.gene07708	7.4352	8.33238e-53	up
MS.gene055157	5.39073	4.49118e-51	up
MS.gene030651	5.22486	9.22977e-50	up
MS.gene99339	4.53963	9.76772e-50	up
MS.gene46065	3.48826	5.71807e-49	up
MS.gene004891	4.26115	2.75914e-48	up
MS.gene89265	4.81951	2.9883e-48	up
MS.gene051399	4.11924	1.73194e-47	up
MS.gene46063	5.5931	3.55425e-46	up
MS.gene79178	2.74591	2.04911e-42	up
MS.gene033629	6.79153	3.19147e-41	up
MS.gene047978	5.54692	1.48071e-40	up
MS.gene38335	7.44518	5.84309e-40	up
MS.gene29570	4.88914	2.41236e-39	up
MS.gene45766	6.88141	5.14104e-39	up
MS.gene020844	3.80963	1.29428e-38	up
MS.gene23769	6.23604	1.33461e-38	up
MS.gene27075	3.57072	1.83149e-38	up
MS.gene21367	5.64911	5.31233e-38	up
MS.gene42621	2.74152	8.55847e-38	up
MS.gene71655	4.36976	1.71443e-37	up
MS.gene007572	8.81961	1.39514e-36	up
MS.gene055991	4.04772	5.22071e-36	up
MS.gene036411	5.2594	1.28788e-35	up
MS.gene013056	2.52472	1.37014e-35	up
MS.gene050312	4.08567	1.38169e-35	up
MS.gene000238	3.40624	1.4824e-35	up
MS.gene038763	2.81935	6.60768e-35	up
MS.gene02298	5.4586	4.62404e-34	up
MS.gene030998	2.93191	5.55633e-34	up
MS.gene003369	7.20474	7.58567e-34	up
MS.gene66840	5.48158	8.04705e-34	up
MS.gene029614	3.60902	8.98914e-34	up
MS.gene31561	4.74833	1.05816e-33	up
MS.gene056650	3.58782	1.0813e-33	up
MS.gene46064	4.65862	1.74104e-33	up
MS.gene21592	4.27616	2.3301e-33	up
MS.gene010631	2.89984	2.34182e-33	up
MS.gene84139	5.60841	3.10337e-33	up
MS.gene061243	3.56976	6.22509e-33	up
MS.gene46066	2.27248	3.32898e-32	up
MS.gene008800	3.77406	3.34823e-32	up
MS.gene93064	4.22013	3.91436e-32	up
MS.gene81590	3.40917	9.15885e-32	up
MS.gene54322	2.32253	1.19198e-31	up
MS.gene59476	3.52972	1.62144e-31	up
MS.gene047977	2.75143	1.76538e-31	up
MS.gene005127	6.2775	2.03253e-31	up
MS.gene008799	4.12328	2.83687e-31	up
MS.gene81272	3.46151	6.29516e-31	up
MS.gene95874	2.47548	9.03368e-31	up
MS.gene47913	2.66036	9.34296e-31	up
MS.gene89266	3.28131	9.65052e-31	up
MS.gene42350	2.70243	1.31458e-30	up
MS.gene43994	7.2223	1.54744e-30	up
MS.gene004319	2.87441	1.76027e-30	up
MS.gene43363	3.04957	1.76027e-30	up
MS.gene06749	5.1257	2.19043e-30	up
MS.gene90875	3.84925	2.49654e-30	up
MS.gene82463	2.97716	9.21458e-30	up
MS.gene03784	8.48528	1.85475e-29	up
MS.gene04628	3.07558	2.12085e-29	up
MS.gene94256	5.76474	2.37181e-29	up
MS.gene007705	3.12963	3.32047e-29	up
MS.gene93063	5.88351	3.74858e-29	up
MS.gene048444	2.36929	3.84992e-29	up
MS.gene030222	2.90697	4.37817e-29	up
MS.gene80979	4.03654	1.14167e-28	up
MS.gene96392	4.55475	1.41959e-28	up
MS.gene44975	2.73611	1.52419e-28	up
MS.gene011339	3.23996	2.00594e-28	up
MS.gene70676	2.62333	3.49824e-28	up
MS.gene66786	2.87067	4.80547e-28	up
MS.gene066490	3.22959	4.97812e-28	up
MS.gene033301	2.40012	5.24262e-28	up
MS.gene58109	4.80224	5.87421e-28	up
MS.gene033300	2.99651	5.93873e-28	up
MS.gene52664	3.49672	8.03214e-28	up
MS.gene90607	5.74356	1.22081e-27	up
MS.gene003815	3.64079	1.3219e-27	up
MS.gene029726	3.64153	2.28374e-27	up
MS.gene80628	3.43824	4.94852e-27	up
MS.gene010261	4.45729	5.0127e-27	up
MS.gene034987	3.88532	5.173e-27	up
MS.gene037397	4.82897	9.14659e-27	up
MS.gene45352	3.21064	1.11361e-26	up
MS.gene09432	5.54732	1.81133e-26	up
MS.gene06447	2.52786	1.85892e-26	up
MS.gene030658	4.55312	1.9236e-26	up
MS.gene050095	2.70099	2.08894e-26	up
MS.gene74544	2.21009	2.52423e-26	up
MS.gene83139	4.14667	3.92993e-26	up
MS.gene055158	2.8616	4.3644e-26	up
MS.gene027790	2.40964	4.69826e-26	up
MS.gene32980	3.68248	6.48404e-26	up
MS.gene70250	4.56837	9.91187e-26	up
MS.gene36174	5.77367	1.01714e-25	up
MS.gene047202	2.52911	1.1574e-25	up
MS.gene78121	6.19267	1.53075e-25	up
MS.gene74685	3.73751	1.54912e-25	up
MS.gene32045	2.15625	1.82205e-25	up
MS.gene20462	2.68591	2.22723e-25	up
MS.gene73494	4.00817	3.57462e-25	up
MS.gene043270	2.59918	3.57462e-25	up
MS.gene069033	2.47095	4.06609e-25	up
MS.gene004783	2.50179	4.53738e-25	up
MS.gene21522	3.36098	4.67414e-25	up
MS.gene47414	4.73242	8.1344e-25	up
MS.gene72362	8.25795	8.40755e-25	up
MS.gene59361	3.94152	1.20429e-24	up
MS.gene96117	4.26646	1.2496e-24	up
MS.gene83781	3.34695	1.25034e-24	up
MS.gene45737	4.99719	1.41342e-24	up
MS.gene89525	4.48517	1.41507e-24	up
MS.gene75985	4.0177	1.62552e-24	up
MS.gene01623	2.81188	1.68375e-24	up
MS.gene72730	2.98165	1.84929e-24	up
MS.gene07414	3.92961	1.99989e-24	up
MS.gene069194	2.66001	2.34059e-24	up
MS.gene016772	3.23601	2.3478e-24	up
MS.gene050984	2.79189	3.42406e-24	up
MS.gene79351	3.26573	7.17787e-24	up
MS.gene042632	3.54049	9.18104e-24	up
MS.gene07410	3.05639	9.34215e-24	up
MS.gene60369	2.78489	2.02873e-23	up
MS.gene049377	2.69014	2.0341e-23	up
MS.gene62014	4.4058	2.16058e-23	up
MS.gene064058	3.33476	2.42428e-23	up
MS.gene89988	6.09715	3.05717e-23	up
MS.gene070221	5.47959	3.55269e-23	up
MS.gene92882	3.7356	4.03108e-23	up
MS.gene053889	3.83008	7.12753e-23	up
MS.gene017979	6.89502	8.87492e-23	up
MS.gene31336	2.24006	1.02148e-22	up
MS.gene28707	4.75921	1.02255e-22	up
MS.gene037805	5.12128	1.17252e-22	up
MS.gene08299	2.3304	1.45296e-22	up
MS.gene55028	3.99545	1.90467e-22	up
MS.gene28453	2.88062	3.32234e-22	up
MS.gene67212	2.15684	3.36646e-22	up
MS.gene97973	3.41562	3.42743e-22	up
MS.gene36004	2.34756	4.19253e-22	up
MS.gene42145	2.88489	4.77247e-22	up
MS.gene37572	2.20205	5.0639e-22	up
MS.gene74305	2.18501	5.42009e-22	up
MS.gene58600	2.23229	6.46965e-22	up
MS.gene03965	3.22937	6.78519e-22	up
MS.gene023016	2.57036	7.26917e-22	up
MS.gene61500	2.85384	8.43109e-22	up
MS.gene056482	4.46214	1.04916e-21	up
MS.gene93101	4.1272	1.26405e-21	up
MS.gene030684	2.73327	1.45695e-21	up
MS.gene074585	2.28506	1.50304e-21	up
MS.gene040004	2.71892	2.72511e-21	up
MS.gene90584	3.35328	3.53444e-21	up
MS.gene94255	3.68882	3.6659e-21	up
MS.gene22987	2.4313	3.7296e-21	up
MS.gene64912	3.61366	5.25997e-21	up
MS.gene06188	4.60331	6.7526e-21	up
MS.gene002638	2.82545	7.02069e-21	up
MS.gene030652	4.60186	7.25642e-21	up
MS.gene052715	2.53293	7.82374e-21	up
MS.gene003300	2.37603	7.93644e-21	up
MS.gene62864	2.84443	9.63724e-21	up
MS.gene027877	2.99979	9.78071e-21	up
MS.gene68386	4.30836	9.9549e-21	up
MS.gene062937	3.19142	1.09295e-20	up
MS.gene004888	2.49467	1.31525e-20	up
MS.gene060528	2.05545	1.48184e-20	up
MS.gene91617	2.80888	1.59456e-20	up
MS.gene038939	2.27038	2.03092e-20	up
MS.gene67442	2.89065	2.09636e-20	up
MS.gene86520	3.46928	2.20194e-20	up
MS.gene000484	2.14765	2.41352e-20	up
MS.gene75142	2.04937	2.70519e-20	up
MS.gene023853	5.41316	3.33194e-20	up
MS.gene065081	2.34459	3.48734e-20	up
MS.gene062245	3.84697	4.26228e-20	up
MS.gene39651	2.63184	4.6061e-20	up
MS.gene069420	3.06638	4.6061e-20	up
MS.gene71906	2.83638	4.76515e-20	up
MS.gene68204	2.12182	6.27751e-20	up
MS.gene64431	2.33621	6.49988e-20	up
MS.gene83466	2.186	7.03205e-20	up
MS.gene048564	4.14341	8.53554e-20	up
MS.gene029855	4.02726	1.23248e-19	up
MS.gene30917	4.04854	1.30949e-19	up
MS.gene004886	2.8835	1.3233e-19	up
MS.gene045577	2.23589	1.32486e-19	up
MS.gene046041	3.05569	1.39996e-19	up
MS.gene070645	4.25178	1.42929e-19	up
MS.gene056494	2.43548	1.62859e-19	up
MS.gene040055	2.37671	1.62941e-19	up
MS.gene048488	2.65794	2.91276e-19	up
MS.gene93239	11.8359	3.72616e-19	up
MS.gene064906	4.44653	4.10208e-19	up
MS.gene039794	6.13351	4.42506e-19	up
MS.gene006986	2.01114	4.677e-19	up
MS.gene92210	4.54809	4.76723e-19	up
MS.gene012838	2.53004	5.65046e-19	up
MS.gene08666	2.87388	5.74649e-19	up
MS.gene53959	5.70719	6.41851e-19	up
MS.gene54724	2.22912	8.7755e-19	up
MS.gene92389	2.15778	1.34999e-18	up
MS.gene40667	3.45329	1.40183e-18	up
MS.gene054809	3.21053	1.49995e-18	up
MS.gene059145	2.49496	1.72866e-18	up
MS.gene023326	2.57016	1.75018e-18	up
MS.gene44473	4.11254	1.94758e-18	up
MS.gene41340	3.11684	2.17395e-18	up
MS.gene68072	3.14545	2.20892e-18	up
MS.gene20607	2.00495	2.88697e-18	up
MS.gene006277	2.37747	3.05262e-18	up
MS.gene86524	2.02962	3.23356e-18	up
MS.gene32444	2.65607	3.35061e-18	up
MS.gene21484	2.40899	3.51152e-18	up
MS.gene005264	2.53871	3.54998e-18	up
MS.gene071873	2.05818	3.61134e-18	up
MS.gene24152	3.62231	4.08849e-18	up
MS.gene32137	2.45796	4.16995e-18	up
MS.gene34909	2.41772	5.23003e-18	up
MS.gene043334	4.93946	6.65555e-18	up
MS.gene047683	2.40478	6.74934e-18	up
MS.gene58042	2.15849	8.25358e-18	up
MS.gene012399	2.94145	8.95811e-18	up
MS.gene82756	2.11443	1.02004e-17	up
MS.gene021902	2.57699	1.08581e-17	up
MS.gene32981	2.53995	1.10325e-17	up
MS.gene057903	2.56503	1.13809e-17	up
MS.gene44303	2.96333	1.25792e-17	up
MS.gene021756	3.01433	1.27969e-17	up
MS.gene76222	2.75681	1.32775e-17	up
MS.gene019913	2.33884	1.43504e-17	up
MS.gene44627	2.73579	1.43955e-17	up
MS.gene41428	4.21056	1.60425e-17	up
MS.gene017561	5.16394	1.72385e-17	up
MS.gene001071	3.13209	1.99112e-17	up
MS.gene38248	2.7562	2.00756e-17	up
MS.gene017946	2.96798	2.08057e-17	up
MS.gene72673	2.0875	2.23948e-17	up
MS.gene09712	3.75024	2.51962e-17	up
MS.gene031826	9.39363	2.61166e-17	up
MS.gene60088	4.3012	2.819e-17	up
MS.gene40664	3.46237	2.88203e-17	up
MS.gene65503	2.65993	3.16728e-17	up
MS.gene004751	2.19928	3.63366e-17	up
MS.gene67451	2.65694	3.82007e-17	up
MS.gene030660	4.91591	4.23694e-17	up
MS.gene06911	2.0794	4.38796e-17	up
MS.gene059686	2.39482	4.52106e-17	up
MS.gene042095	3.03705	5.50402e-17	up
MS.gene58108	3.82628	5.51621e-17	up
MS.gene82520	3.38222	7.14169e-17	up
MS.gene32445	2.27367	7.59173e-17	up
MS.gene38003	3.04658	8.38038e-17	up
MS.gene028844	4.48219	9.06624e-17	up
MS.gene47489	2.65291	1.05252e-16	up
MS.gene039314	3.02346	1.06347e-16	up
MS.gene007747	4.26521	1.08886e-16	up
MS.gene98524	4.65108	1.12595e-16	up
MS.gene011896	3.10318	1.17458e-16	up
MS.gene49382	3.06681	1.23237e-16	up
MS.gene069970	5.94094	1.29157e-16	up
MS.gene72003	10.5829	1.29555e-16	up
MS.gene07711	6.32952	1.31643e-16	up
MS.gene41567	3.65275	1.50375e-16	up
MS.gene63856	2.07313	1.52863e-16	up
MS.gene013629	6.99861	1.9509e-16	up
MS.gene66308	3.67562	2.44435e-16	up
MS.gene30913	4.72393	2.85152e-16	up
MS.gene018043	4.92347	3.22927e-16	up
MS.gene063016	2.45461	3.73717e-16	up
MS.gene67328	2.41609	3.95611e-16	up
MS.gene032768	2.39007	5.45517e-16	up
MS.gene074464	2.2678	5.70523e-16	up
MS.gene027518	2.10771	5.96048e-16	up
MS.gene65502	2.4408	6.06089e-16	up
MS.gene054905	3.10768	6.06089e-16	up
MS.gene34486	4.04357	6.88484e-16	up
MS.gene44131	2.60257	8.07099e-16	up
MS.gene30317	2.82484	8.21306e-16	up
MS.gene064181	2.3936	8.89092e-16	up
MS.gene052313	7.42921	8.96602e-16	up
MS.gene29180	3.13092	1.02405e-15	up
MS.gene53126	3.09403	1.04112e-15	up
MS.gene31710	2.11976	1.14876e-15	up
MS.gene22374	10.3726	1.23552e-15	up
MS.gene07486	3.15112	1.24903e-15	up
MS.gene01199	4.15652	1.26903e-15	up
MS.gene42872	2.96159	1.34043e-15	up
MS.gene008006	3.22708	1.4864e-15	up
MS.gene88914	2.53338	2.04583e-15	up
MS.gene95223	2.55113	2.17531e-15	up
MS.gene002595	2.40562	2.28122e-15	up
MS.gene88345	3.87582	2.56749e-15	up
MS.gene96519	3.17117	2.67892e-15	up
MS.gene30298	2.55569	2.82692e-15	up
MS.gene010408	2.17444	3.00434e-15	up
MS.gene037580	3.73475	3.23939e-15	up
MS.gene67661	3.18466	3.59521e-15	up
MS.gene053740	2.03594	3.91256e-15	up
MS.gene62995	2.95356	3.91693e-15	up
MS.gene02146	2.67246	4.24982e-15	up
MS.gene063668	2.03194	4.42294e-15	up
MS.gene08732	3.12584	4.50867e-15	up
MS.gene02098	2.45253	4.61878e-15	up
MS.gene86534	4.33947	4.69332e-15	up
MS.gene81069	2.8067	5.04516e-15	up
MS.gene31255	3.56163	5.12921e-15	up
MS.gene00536	4.7011	5.51107e-15	up
MS.gene58104	4.94617	5.52171e-15	up
MS.gene05725	2.94901	6.10912e-15	up
MS.gene01113	2.24292	6.24463e-15	up
MS.gene036147	2.29562	6.36423e-15	up
MS.gene45150	2.72877	6.40885e-15	up
MS.gene54459	3.43871	6.70477e-15	up
MS.gene20588	2.42243	7.58058e-15	up
MS.gene027509	2.30781	7.81705e-15	up
MS.gene32226	3.03948	7.92452e-15	up
MS.gene073770	3.10521	8.10519e-15	up
MS.gene52221	4.79274	8.16217e-15	up
MS.gene06502	2.09096	8.39686e-15	up
MS.gene044738	3.88728	1.37174e-14	up
MS.gene99506	2.35453	1.49076e-14	up
MS.gene42687	2.26495	1.69682e-14	up
MS.gene039022	2.24171	1.86801e-14	up
MS.gene28823	8.64689	2.08052e-14	up
MS.gene047831	2.32785	2.17712e-14	up
MS.gene029150	3.48037	2.20671e-14	up
MS.gene002042	2.01051	2.22112e-14	up
MS.gene59687	4.04501	2.52532e-14	up
MS.gene07412	2.3019	2.55245e-14	up
MS.gene53020	2.15908	2.66028e-14	up
MS.gene72930	2.13369	2.73374e-14	up
MS.gene61243	3.90269	3.17346e-14	up
MS.gene021609	2.24543	3.74556e-14	up
MS.gene016656	2.3143	4.26681e-14	up
MS.gene019918	3.59019	4.31503e-14	up
MS.gene42113	4.16408	4.5418e-14	up
MS.gene026614	2.87477	5.02653e-14	up
MS.gene23552	2.33933	5.55666e-14	up
MS.gene010701	3.08279	5.63048e-14	up
MS.gene93077	2.60145	6.09478e-14	up
MS.gene83138	3.25036	6.2706e-14	up
MS.gene027053	2.30587	6.3131e-14	up
MS.gene45343	2.2804	6.3131e-14	up
MS.gene87066	4.09678	6.62324e-14	up
MS.gene29108	4.4424	7.39387e-14	up
MS.gene64778	3.41566	7.96568e-14	up
MS.gene87367	2.82067	8.0751e-14	up
MS.gene59045	2.49163	9.12951e-14	up
MS.gene90539	2.30666	9.36603e-14	up
MS.gene88307	2.53561	9.54245e-14	up
MS.gene93725	9.52549	9.71851e-14	up
MS.gene036797	2.84687	1.01534e-13	up
MS.gene065721	2.67191	1.02229e-13	up
MS.gene007704	2.16096	1.08488e-13	up
MS.gene054754	3.38335	1.15152e-13	up
MS.gene99828	2.54445	1.31783e-13	up
MS.gene49108	2.17034	1.35521e-13	up
MS.gene035992	2.15271	1.44173e-13	up
MS.gene041383	3.24785	1.58109e-13	up
MS.gene62405	2.80164	1.66793e-13	up
MS.gene94906	2.36938	1.68682e-13	up
MS.gene99049	2.51435	1.81044e-13	up
MS.gene46828	2.07618	1.98908e-13	up
MS.gene030574	4.97085	2.02856e-13	up
MS.gene004158	2.92506	2.10697e-13	up
MS.gene27591	3.16025	2.12422e-13	up
MS.gene044089	3.62384	2.46271e-13	up
MS.gene26541	2.92004	2.474e-13	up
MS.gene70281	2.36774	2.66233e-13	up
MS.gene011265	2.3287	2.89732e-13	up
MS.gene07853	2.34455	2.90659e-13	up
MS.gene004968	3.16739	2.95962e-13	up
MS.gene60339	2.20568	2.98895e-13	up
MS.gene008981	2.96004	3.01855e-13	up
MS.gene021393	2.25678	3.12194e-13	up
MS.gene015600	2.83984	3.12198e-13	up
MS.gene031922	2.91858	3.27203e-13	up
MS.gene000336	2.8807	3.34591e-13	up
MS.gene010725	2.64694	3.52511e-13	up
MS.gene36423	3.24126	3.67675e-13	up
MS.gene031177	2.47207	3.88627e-13	up
MS.gene08627	2.05232	3.90994e-13	up
MS.gene071174	2.08176	4.16465e-13	up
MS.gene64769	2.20356	4.87341e-13	up
MS.gene025671	2.18753	5.0307e-13	up
MS.gene78685	2.20449	5.19663e-13	up
MS.gene047591	3.82197	5.30951e-13	up
MS.gene049759	3.91177	5.67488e-13	up
MS.gene67188	2.59611	5.68934e-13	up
MS.gene064661	2.61346	6.12424e-13	up
MS.gene04674	2.74005	6.71405e-13	up
MS.gene027711	2.99034	6.98172e-13	up
MS.gene86467	3.26039	7.47808e-13	up
MS.gene82180	2.04217	7.60652e-13	up
MS.gene054621	3.73741	7.7309e-13	up
MS.gene007544	2.11498	7.82528e-13	up
MS.gene22632	4.12361	7.86464e-13	up
MS.gene28431	6.01371	8.45225e-13	up
MS.gene28528	2.73541	8.45754e-13	up
MS.gene00862	2.36586	8.68911e-13	up
MS.gene65997	3.81202	9.65955e-13	up
MS.gene056647	3.20964	9.89108e-13	up
MS.gene011582	9.27283	1.0069e-12	up
MS.gene002905	4.64648	1.01738e-12	up
MS.gene072398	8.03547	1.02361e-12	up
MS.gene97301	2.73601	1.04443e-12	up
MS.gene035993	2.02361	1.04951e-12	up
MS.gene024363	2.42675	1.04951e-12	up
MS.gene039477	3.3339	1.06856e-12	up
MS.gene26544	3.07978	1.19918e-12	up
MS.gene20616	2.04059	1.29535e-12	up
MS.gene26832	3.9076	1.30189e-12	up
MS.gene89779	2.15877	1.30746e-12	up
MS.gene007372	9.17539	1.36433e-12	up
MS.gene071035	2.36569	1.48827e-12	up
MS.gene26637	3.02108	1.57199e-12	up
MS.gene39612	2.30001	1.58941e-12	up
MS.gene22405	2.61513	1.71188e-12	up
MS.gene01540	2.28205	1.82823e-12	up
MS.gene97647	2.56641	1.86876e-12	up
MS.gene07041	2.31732	1.86945e-12	up
MS.gene28424	5.81518	2.04282e-12	up
MS.gene062789	5.13479	2.09611e-12	up
MS.gene017559	5.26614	2.17075e-12	up
MS.gene002837	3.35981	2.23489e-12	up
MS.gene028336	3.75368	2.24708e-12	up
MS.gene72379	2.46876	2.26896e-12	up
MS.gene049951	2.4755	2.53001e-12	up
MS.gene045340	3.87105	2.65907e-12	up
MS.gene035612	4.66859	2.82451e-12	up
MS.gene66665	4.81735	3.02349e-12	up
MS.gene045645	3.00262	3.13753e-12	up
MS.gene08986	3.14744	3.18059e-12	up
MS.gene062162	3.06667	3.23081e-12	up
MS.gene007654	2.05362	3.31026e-12	up
MS.gene07377	3.38031	3.45928e-12	up
MS.gene019361	2.40002	3.61606e-12	up
MS.gene074537	3.29127	3.73298e-12	up
MS.gene58111	4.4696	3.77464e-12	up
MS.gene41276	3.38064	3.84706e-12	up
MS.gene30016	2.60635	4.03103e-12	up
MS.gene32771	2.36158	4.03542e-12	up
MS.gene94254	2.82433	4.07776e-12	up
MS.gene025145	2.19393	4.1042e-12	up
MS.gene022340	2.0643	4.44113e-12	up
MS.gene60696	2.63369	4.65142e-12	up
MS.gene92270	2.30805	4.81445e-12	up
MS.gene049483	3.41372	5.0914e-12	up
MS.gene056068	2.35646	5.35456e-12	up
MS.gene48475	2.77211	5.74472e-12	up
MS.gene20167	2.97264	5.86665e-12	up
MS.gene39867	4.42739	6.29454e-12	up
MS.gene63789	4.02861	6.77544e-12	up
MS.gene030120	6.62985	6.99176e-12	up
MS.gene025886	4.30667	7.34189e-12	up
MS.gene99565	4.00164	7.50987e-12	up
MS.gene37897	3.36389	8.13482e-12	up
MS.gene23825	3.03418	8.15224e-12	up
MS.gene31626	2.32291	8.20255e-12	up
MS.gene047991	2.5701	9.20268e-12	up
MS.gene24805	3.07071	9.37486e-12	up
MS.gene00231	2.49522	9.68089e-12	up
MS.gene91400	3.26446	1.09294e-11	up
MS.gene030920	2.70726	1.11907e-11	up
MS.gene35757	4.60873	1.13126e-11	up
MS.gene08201	2.17655	1.14759e-11	up
MS.gene052534	3.94065	1.1591e-11	up
MS.gene34150	2.14814	1.16023e-11	up
MS.gene95677	2.60802	1.18865e-11	up
MS.gene046328	3.2596	1.18941e-11	up
MS.gene95648	2.24988	1.20283e-11	up
MS.gene006149	4.01408	1.22014e-11	up
MS.gene09260	3.44011	1.23064e-11	up
MS.gene015326	2.2566	1.2616e-11	up
MS.gene061167	2.55116	1.2616e-11	up
MS.gene66787	3.30319	1.31804e-11	up
MS.gene039231	2.38557	1.32779e-11	up
MS.gene60016	2.3129	1.38118e-11	up
MS.gene81036	2.23885	1.39638e-11	up
MS.gene62913	2.33236	1.39659e-11	up
MS.gene012202	3.34988	1.4569e-11	up
MS.gene77397	2.66731	1.46446e-11	up
MS.gene01685	3.58085	1.47217e-11	up
MS.gene07850	2.56172	1.52739e-11	up
MS.gene23884	3.49683	1.57075e-11	up
MS.gene035674	2.69419	1.62728e-11	up
MS.gene00459	2.44979	1.68566e-11	up
MS.gene28428	4.50959	1.78079e-11	up
MS.gene24547	3.06988	1.78665e-11	up
MS.gene00616	2.46497	1.80719e-11	up
MS.gene78559	2.54575	1.86289e-11	up
MS.gene022350	2.09444	2.02187e-11	up
MS.gene82323	2.14854	2.20528e-11	up
MS.gene051028	2.12812	2.27604e-11	up
MS.gene48426	2.32604	2.32845e-11	up
MS.gene36005	2.70399	2.42538e-11	up
MS.gene66234	3.07836	2.57487e-11	up
MS.gene64077	2.24243	2.59003e-11	up
MS.gene041920	2.95258	2.61369e-11	up
MS.gene22638	2.10301	2.62264e-11	up
MS.gene29049	4.87157	2.88013e-11	up
MS.gene066772	2.74493	3.08204e-11	up
MS.gene057765	2.23083	3.12546e-11	up
MS.gene85532	3.03938	3.46353e-11	up
MS.gene053476	2.67097	3.90748e-11	up
MS.gene44279	2.0181	4.01119e-11	up
MS.gene28620	2.26317	4.11669e-11	up
MS.gene03499	3.72414	4.16578e-11	up
MS.gene072694	2.63981	4.24482e-11	up
MS.gene040957	2.98057	4.30492e-11	up
MS.gene74773	3.04881	4.51594e-11	up
MS.gene49083	4.46808	4.67313e-11	up
MS.gene80525	3.40546	4.68186e-11	up
MS.gene49602	2.1526	4.69709e-11	up
MS.gene89097	2.16309	5.01412e-11	up
MS.gene55919	4.78619	5.1596e-11	up
MS.gene28816	2.92265	5.30988e-11	up
MS.gene89267	2.29935	5.45849e-11	up
MS.gene72030	3.37542	5.71118e-11	up
MS.gene028705	2.00291	5.85072e-11	up
MS.gene032517	2.36481	5.94963e-11	up
MS.gene28801	2.62187	6.08057e-11	up
MS.gene032930	3.03503	6.28182e-11	up
MS.gene86208	2.94265	6.30995e-11	up
MS.gene012146	3.09532	6.31441e-11	up
MS.gene06503	2.47693	6.32527e-11	up
MS.gene31962	2.07584	6.38752e-11	up
MS.gene67910	3.12022	6.86771e-11	up
MS.gene73930	2.14754	7.12235e-11	up
MS.gene072377	2.19142	7.94153e-11	up
MS.gene074378	2.19978	8.28833e-11	up
MS.gene011340	2.09702	8.48745e-11	up
MS.gene014297	7.77917	8.58719e-11	up
MS.gene76510	2.08879	8.79483e-11	up
MS.gene015922	2.93632	9.73123e-11	up
MS.gene28081	2.00713	1.03739e-10	up
MS.gene031823	8.67597	1.04783e-10	up
MS.gene002607	3.49115	1.08378e-10	up
MS.gene05348	2.77818	1.08448e-10	up
MS.gene013353	2.75435	1.1333e-10	up
MS.gene001801	2.50049	1.16887e-10	up
MS.gene031314	3.71465	1.17739e-10	up
MS.gene20109	2.50232	1.18855e-10	up
MS.gene041141	2.19626	1.23167e-10	up
MS.gene81892	2.19517	1.23546e-10	up
MS.gene81060	2.01134	1.27739e-10	up
MS.gene070871	3.73604	1.35904e-10	up
MS.gene25936	2.46199	1.3681e-10	up
MS.gene79631	3.30583	1.54077e-10	up
MS.gene026315	2.53035	1.58005e-10	up
MS.gene001948	2.95165	1.61051e-10	up
MS.gene09159	2.10911	1.61771e-10	up
MS.gene07857	3.46015	1.64562e-10	up
MS.gene52171	4.5157	1.69994e-10	up
MS.gene45142	2.0879	1.71149e-10	up
MS.gene94104	2.07124	1.73321e-10	up
MS.gene003632	3.34684	1.87622e-10	up
MS.gene064690	3.46076	1.94002e-10	up
MS.gene51080	2.85669	1.94603e-10	up
MS.gene030112	2.74208	2.07078e-10	up
MS.gene051158	2.13615	2.13442e-10	up
MS.gene00168	2.76729	2.18992e-10	up
MS.gene044075	2.27505	2.201e-10	up
MS.gene028137	3.28264	2.20545e-10	up
MS.gene38845	3.11118	2.22475e-10	up
MS.gene039516	2.42426	2.41541e-10	up
MS.gene030656	5.42815	2.56554e-10	up
MS.gene67329	2.05996	2.67728e-10	up
MS.gene98223	3.28877	2.69262e-10	up
MS.gene58788	2.86465	2.96812e-10	up
MS.gene85597	2.66079	3.04076e-10	up
MS.gene79707	4.36435	3.31997e-10	up
MS.gene054133	2.85875	3.38905e-10	up
MS.gene36009	4.11632	3.82093e-10	up
MS.gene057472	2.5877	3.84181e-10	up
MS.gene039270	2.24335	4.12306e-10	up
MS.gene24578	6.06329	4.46896e-10	up
MS.gene69943	8.44606	4.53196e-10	up
MS.gene95383	5.63808	4.54145e-10	up
MS.gene49935	4.62262	4.63917e-10	up
MS.gene39404	3.80246	4.66807e-10	up
MS.gene014263	2.44002	4.98116e-10	up
MS.gene073220	5.09324	5.0497e-10	up
MS.gene051232	2.59919	5.22021e-10	up
MS.gene067013	2.46896	5.27107e-10	up
MS.gene043557	2.26977	5.52282e-10	up
MS.gene43542	2.45042	5.59463e-10	up
MS.gene073776	4.25303	5.68857e-10	up
MS.gene069110	2.35368	5.95728e-10	up
MS.gene61659	3.61385	6.0183e-10	up
MS.gene008755	2.12525	6.1171e-10	up
MS.gene004901	2.9387	6.16273e-10	up
MS.gene09670	2.80354	6.23373e-10	up
MS.gene069181	5.30539	6.38692e-10	up
MS.gene005602	2.22928	6.77547e-10	up
MS.gene58133	2.26138	6.92385e-10	up
MS.gene03199	2.03999	6.92385e-10	up
MS.gene001242	2.03228	6.93525e-10	up
MS.gene069000	2.522	6.95028e-10	up
MS.gene036336	3.07577	7.11869e-10	up
MS.gene20655	3.17362	7.16726e-10	up
MS.gene055946	3.85689	7.63166e-10	up
MS.gene011628	2.96159	7.76885e-10	up
MS.gene53562	4.5692	8.14198e-10	up
MS.gene65763	3.07002	8.24809e-10	up
MS.gene91651	2.89776	8.30995e-10	up
MS.gene052989	7.01942	8.4326e-10	up
MS.gene09631	2.16883	9.32338e-10	up
MS.gene011344	3.41916	9.53938e-10	up
MS.gene039378	7.06952	9.63483e-10	up
MS.gene062430	3.30478	1.03486e-09	up
MS.gene007402	2.20946	1.04345e-09	up
MS.gene026111	2.29589	1.07309e-09	up
MS.gene062797	2.05309	1.07679e-09	up
MS.gene76602	3.01104	1.13382e-09	up
MS.gene49337	2.26735	1.21058e-09	up
MS.gene37039	2.14519	1.22744e-09	up
MS.gene01576	2.14131	1.23426e-09	up
MS.gene031821	4.96799	1.26641e-09	up
MS.gene07063	2.57505	1.35145e-09	up
MS.gene063149	3.05763	1.38135e-09	up
MS.gene056395	2.47345	1.38323e-09	up
MS.gene032073	2.21706	1.39638e-09	up
MS.gene33837	2.73815	1.41063e-09	up
MS.gene055908	3.67841	1.4157e-09	up
MS.gene69945	7.10218	1.43073e-09	up
MS.gene64577	2.6882	1.43077e-09	up
MS.gene063957	4.28862	1.43833e-09	up
MS.gene30213	8.41736	1.44315e-09	up
MS.gene032256	2.17212	1.52183e-09	up
MS.gene89750	3.11898	1.53872e-09	up
MS.gene02350	3.38955	1.53966e-09	up
MS.gene058219	2.42525	1.62615e-09	up
MS.gene40838	2.27411	1.62615e-09	up
MS.gene67899	3.1815	1.64695e-09	up
MS.gene84136	4.60765	1.67134e-09	up
MS.gene023607	2.04063	1.68182e-09	up
MS.gene030281	2.95738	1.70429e-09	up
MS.gene046858	2.26469	1.7446e-09	up
MS.gene013966	2.04989	1.77254e-09	up
MS.gene76900	3.61488	1.78531e-09	up
MS.gene50588	2.37178	1.83869e-09	up
MS.gene88938	2.18212	1.86848e-09	up
MS.gene010037	3.41046	1.90453e-09	up
MS.gene74083	3.82963	2.00955e-09	up
MS.gene23264	2.32735	2.02581e-09	up
MS.gene96065	3.16741	2.07988e-09	up
MS.gene064787	4.47044	2.12251e-09	up
MS.gene015374	3.63834	2.27111e-09	up
MS.gene62994	3.15409	2.32563e-09	up
MS.gene40787	2.3485	2.34002e-09	up
MS.gene30709	2.10669	2.3907e-09	up
MS.gene037755	2.35872	2.39327e-09	up
MS.gene44180	2.68489	2.39863e-09	up
MS.gene38665	8.34059	2.60623e-09	up
MS.gene49879	2.38047	2.60774e-09	up
MS.gene59817	3.2581	2.6424e-09	up
MS.gene42346	2.19084	2.70427e-09	up
MS.gene55458	3.63156	2.71532e-09	up
MS.gene76400	2.27365	2.78276e-09	up
MS.gene61206	2.17872	2.82069e-09	up
MS.gene72332	2.37772	2.82089e-09	up
MS.gene31009	4.39563	2.83368e-09	up
MS.gene75656	2.56821	2.84901e-09	up
MS.gene026033	2.50228	2.97305e-09	up
MS.gene27195	3.25251	3.04788e-09	up
MS.gene23435	3.30777	3.05958e-09	up
MS.gene006091	3.90148	3.22956e-09	up
MS.gene040599	2.46649	3.34075e-09	up
MS.gene26004	4.92329	3.41427e-09	up
MS.gene88364	2.29889	3.45171e-09	up
MS.gene039285	2.81198	3.53546e-09	up
MS.gene063995	2.38168	3.66864e-09	up
MS.gene017086	2.05557	4.4325e-09	up
MS.gene28258	2.76736	4.52955e-09	up
MS.gene76232	2.30675	4.8807e-09	up
MS.gene85587	5.55231	5.10306e-09	up
MS.gene000608	4.99299	5.11739e-09	up
MS.gene022105	3.49697	5.11835e-09	up
MS.gene059236	2.04845	5.29776e-09	up
MS.gene018531	3.00538	5.39958e-09	up
MS.gene45666	2.14819	5.53142e-09	up
MS.gene021464	2.18629	5.54474e-09	up
MS.gene052962	6.1362	5.57166e-09	up
MS.gene07072	8.20328	5.61939e-09	up
MS.gene31709	2.66325	6.04655e-09	up
MS.gene042377	2.39494	6.29726e-09	up
MS.gene78412	2.13457	6.3892e-09	up
MS.gene47490	2.45185	6.53964e-09	up
MS.gene44571	3.38451	6.62735e-09	up
MS.gene00916	2.52521	6.70672e-09	up
MS.gene073934	4.36155	6.80459e-09	up
MS.gene39613	2.77157	6.86586e-09	up
MS.gene050129	2.01491	6.97178e-09	up
MS.gene87063	2.11017	7.68123e-09	up
MS.gene002844	2.42154	7.77308e-09	up
MS.gene00251	2.22714	7.79434e-09	up
MS.gene047011	3.01106	8.39705e-09	up
MS.gene76995	2.7102	9.16067e-09	up
MS.gene63714	4.00449	9.16358e-09	up
MS.gene020422	2.45971	9.1688e-09	up
MS.gene017902	3.16525	9.43152e-09	up
MS.gene83534	2.05203	9.67007e-09	up
MS.gene010321	2.4257	9.67007e-09	up
MS.gene003868	2.27642	9.80192e-09	up
MS.gene48315	2.81789	1.00551e-08	up
MS.gene61254	4.26203	1.00749e-08	up
MS.gene03712	3.99363	1.02296e-08	up
MS.gene96066	2.67216	1.0301e-08	up
MS.gene041055	3.39808	1.05099e-08	up
MS.gene60007	2.20494	1.07239e-08	up
MS.gene062791	4.58146	1.11336e-08	up
MS.gene065582	2.77578	1.18972e-08	up
MS.gene07326	2.30907	1.23416e-08	up
MS.gene012849	3.57256	1.26816e-08	up
MS.gene057097	3.03093	1.37374e-08	up
MS.gene53714	2.39764	1.4273e-08	up
MS.gene001533	2.70878	1.4273e-08	up
MS.gene049378	2.5877	1.43528e-08	up
MS.gene012129	2.02755	1.44572e-08	up
MS.gene025510	2.01986	1.58572e-08	up
MS.gene67457	2.20202	1.61491e-08	up
MS.gene028690	2.38689	1.68498e-08	up
MS.gene79908	3.76148	1.76882e-08	up
MS.gene28115	2.19482	1.77969e-08	up
MS.gene056049	2.08496	1.78402e-08	up
MS.gene01272	5.44752	1.81997e-08	up
MS.gene021119	2.06353	1.85933e-08	up
MS.gene07479	7.45662	1.88758e-08	up
MS.gene53342	3.64748	2.02379e-08	up
MS.gene24747	2.69565	2.05973e-08	up
MS.gene008756	2.3715	2.0949e-08	up
MS.gene012315	2.68037	2.3152e-08	up
MS.gene022109	3.26515	2.36512e-08	up
MS.gene04617	7.745	2.36618e-08	up
MS.gene054616	2.5621	2.37874e-08	up
MS.gene31525	3.0191	2.41614e-08	up
MS.gene043367	2.51703	2.42852e-08	up
MS.gene06026	5.47882	2.44672e-08	up
MS.gene028412	3.94561	2.51223e-08	up
MS.gene028367	4.61249	2.58055e-08	up
MS.gene052588	7.68484	2.61771e-08	up
MS.gene035709	2.67424	2.73977e-08	up
MS.gene78019	2.20457	2.79375e-08	up
MS.gene073451	2.21834	2.9153e-08	up
MS.gene76044	2.16135	2.93117e-08	up
MS.gene014530	2.54019	3.02395e-08	up
MS.gene061959	2.79052	3.04513e-08	up
MS.gene36685	2.79322	3.1183e-08	up
MS.gene81583	2.26268	3.20424e-08	up
MS.gene017589	2.47728	3.32233e-08	up
MS.gene024565	2.88205	3.3322e-08	up
MS.gene79036	7.93603	3.40708e-08	up
MS.gene074308	7.65524	3.4601e-08	up
MS.gene79911	2.16306	3.56042e-08	up
MS.gene37156	3.06672	3.56193e-08	up
MS.gene85584	2.74241	3.69335e-08	up
MS.gene050522	2.78423	3.85004e-08	up
MS.gene57193	2.29003	3.89714e-08	up
MS.gene019914	2.10201	3.95259e-08	up
MS.gene58105	4.12144	4.11986e-08	up
MS.gene23011	2.08628	4.234e-08	up
MS.gene03710	4.19548	4.29014e-08	up
MS.gene31716	5.27557	4.31828e-08	up
MS.gene054421	3.17013	4.40579e-08	up
MS.gene05713	3.99849	4.44846e-08	up
MS.gene52056	2.65701	4.52227e-08	up
MS.gene78096	3.42666	4.80966e-08	up
MS.gene36133	3.05106	4.99202e-08	up
MS.gene60682	2.23169	4.99785e-08	up
MS.gene89102	7.95163	5.32637e-08	up
MS.gene97002	2.42927	5.34481e-08	up
MS.gene97155	2.46744	5.83891e-08	up
MS.gene46114	2.25705	5.94494e-08	up
MS.gene042138	2.32426	5.96563e-08	up
MS.gene26654	2.22822	6.06159e-08	up
MS.gene056186	5.11379	6.09661e-08	up
MS.gene014392	3.0299	6.10688e-08	up
MS.gene33191	7.66603	6.16753e-08	up
MS.gene022497	3.38643	6.42959e-08	up
MS.gene70254	7.49496	6.45785e-08	up
MS.gene005212	2.24122	6.48495e-08	up
MS.gene003731	3.04094	6.50608e-08	up
MS.gene037710	2.46321	6.56372e-08	up
MS.gene32437	4.36744	6.71143e-08	up
MS.gene007720	2.08884	6.79118e-08	up
MS.gene051750	2.50474	6.89368e-08	up
MS.gene006171	2.29629	7.09688e-08	up
MS.gene95026	2.58103	7.36171e-08	up
MS.gene29837	3.6487	7.53458e-08	up
MS.gene33830	2.60705	7.54011e-08	up
MS.gene06748	3.16386	7.68307e-08	up
MS.gene57075	2.57207	7.75848e-08	up
MS.gene23365	4.15417	7.89659e-08	up
MS.gene058186	2.15775	8.11449e-08	up
MS.gene79280	2.87959	8.40984e-08	up
MS.gene90056	2.95859	8.56835e-08	up
MS.gene60602	2.75606	8.95077e-08	up
MS.gene037965	4.57227	9.21628e-08	up
MS.gene82964	3.48634	9.26474e-08	up
MS.gene28740	4.87661	9.42651e-08	up
MS.gene022030	3.71799	9.69485e-08	up
MS.gene79630	2.63246	9.8113e-08	up
MS.gene007456	2.40675	1.01101e-07	up
MS.gene91521	2.64471	1.01761e-07	up
MS.gene31306	2.55593	1.04501e-07	up
MS.gene008623	4.00233	1.04565e-07	up
MS.gene069208	2.97994	1.10823e-07	up
MS.gene036389	2.4857	1.11398e-07	up
MS.gene44626	2.63549	1.12152e-07	up
MS.gene022349	3.14308	1.14474e-07	up
MS.gene066584	2.10393	1.20854e-07	up
MS.gene022821	2.09939	1.23132e-07	up
MS.gene008694	2.02665	1.23603e-07	up
MS.gene48480	3.20761	1.23862e-07	up
MS.gene29692	2.6632	1.27036e-07	up
MS.gene016794	5.57647	1.27766e-07	up
MS.gene92128	4.9083	1.28418e-07	up
MS.gene021671	2.46213	1.29566e-07	up
MS.gene70807	2.86081	1.37576e-07	up
MS.gene07423	3.41461	1.38761e-07	up
MS.gene23668	2.11944	1.3885e-07	up
MS.gene02349	3.21532	1.40032e-07	up
MS.gene07071	7.88439	1.40149e-07	up
MS.gene068335	2.00552	1.40582e-07	up
MS.gene71788	2.55243	1.63335e-07	up
MS.gene55876	3.83928	1.63899e-07	up
MS.gene52719	2.84841	1.65737e-07	up
MS.gene70249	7.75501	1.66303e-07	up
MS.gene31028	3.01462	1.66344e-07	up
MS.gene028129	2.06503	1.67878e-07	up
MS.gene036290	4.27849	1.71125e-07	up
MS.gene07419	2.1177	1.73265e-07	up
MS.gene76257	2.30527	1.79895e-07	up
MS.gene02252	5.49194	1.81852e-07	up
MS.gene65285	2.38423	1.81918e-07	up
MS.gene68678	2.04421	1.83601e-07	up
MS.gene025842	4.32329	1.83763e-07	up
MS.gene59150	2.84219	1.84213e-07	up
MS.gene38012	2.70986	1.85445e-07	up
MS.gene53348	2.27379	2.00046e-07	up
MS.gene030654	3.48098	2.01558e-07	up
MS.gene28706	7.26408	2.02844e-07	up
MS.gene034419	2.2691	2.15166e-07	up
MS.gene71455	2.20146	2.22984e-07	up
MS.gene012874	7.02009	2.26459e-07	up
MS.gene27560	2.01955	2.40946e-07	up
MS.gene73320	2.72863	2.47588e-07	up
MS.gene31058	2.0958	2.57235e-07	up
MS.gene33129	2.13926	2.60205e-07	up
MS.gene80238	2.68885	2.60387e-07	up
MS.gene007329	3.27398	2.71171e-07	up
MS.gene44112	2.23328	2.72387e-07	up
MS.gene95759	2.35248	2.8536e-07	up
MS.gene09373	2.39867	2.91121e-07	up
MS.gene002146	2.67442	2.92189e-07	up
MS.gene002304	2.73047	2.97302e-07	up
MS.gene037560	3.46505	3.00999e-07	up
MS.gene86230	2.04215	3.02331e-07	up
MS.gene018418	7.26496	3.09592e-07	up
MS.gene045334	2.41994	3.11895e-07	up
MS.gene064836	5.62406	3.16362e-07	up
MS.gene042366	2.09844	3.21708e-07	up
MS.gene31994	2.91218	3.33007e-07	up
MS.gene49612	2.51317	3.42002e-07	up
MS.gene050710	4.35684	3.42107e-07	up
MS.gene55246	2.96742	3.50653e-07	up
MS.gene010368	2.5844	3.52185e-07	up
MS.gene007917	2.31573	3.54308e-07	up
MS.gene45031	2.25167	3.66318e-07	up
MS.gene66845	2.63766	3.70976e-07	up
MS.gene059943	2.96851	3.72606e-07	up
MS.gene072875	2.01524	3.77686e-07	up
MS.gene73747	7.34036	3.80169e-07	up
MS.gene49705	2.14574	3.81854e-07	up
MS.gene35085	7.1125	3.84533e-07	up
MS.gene50542	2.08364	3.92875e-07	up
MS.gene027046	5.50563	3.94756e-07	up
MS.gene06222	2.32363	3.99348e-07	up
MS.gene37460	4.50398	4.02504e-07	up
MS.gene032761	2.09558	4.14062e-07	up
MS.gene004177	3.07028	4.18647e-07	up
MS.gene29159	3.28176	4.23954e-07	up
MS.gene065050	3.23615	4.4217e-07	up
MS.gene43174	2.39054	4.43857e-07	up
MS.gene61200	4.67541	4.44036e-07	up
MS.gene93744	3.53979	4.46603e-07	up
MS.gene041096	2.33661	4.48051e-07	up
MS.gene046028	3.87683	4.49883e-07	up
MS.gene019900	2.28579	4.53722e-07	up
MS.gene028979	3.48638	4.58392e-07	up
MS.gene28429	4.73175	4.7149e-07	up
MS.gene05362	2.44877	4.75034e-07	up
MS.gene74774	2.3004	4.90263e-07	up
MS.gene062249	3.01738	5.26207e-07	up
MS.gene73349	2.3145	5.38298e-07	up
MS.gene55182	2.15795	5.79584e-07	up
MS.gene013044	2.84683	6.1157e-07	up
MS.gene064313	2.93358	6.14002e-07	up
MS.gene70255	6.1577	6.1886e-07	up
MS.gene006239	2.93465	6.21281e-07	up
MS.gene67689	2.4063	6.30298e-07	up
MS.gene039954	3.17226	6.31586e-07	up
MS.gene40012	2.26498	6.40876e-07	up
MS.gene072411	2.93055	6.41718e-07	up
MS.gene82502	3.00954	6.56575e-07	up
MS.gene33770	2.45298	7.07902e-07	up
MS.gene65102	2.46008	7.22251e-07	up
MS.gene31622	4.68311	7.61447e-07	up
MS.gene39405	4.05894	7.7327e-07	up
MS.gene77546	3.35232	7.7327e-07	up
MS.gene26346	2.09629	7.96171e-07	up
MS.gene017618	3.09298	8.0597e-07	up
MS.gene77719	6.853	8.50886e-07	up
MS.gene032567	3.22397	8.54856e-07	up
MS.gene054425	2.23731	8.56782e-07	up
MS.gene61710	7.43384	9.02379e-07	up
MS.gene051480	4.33016	9.13219e-07	up
MS.gene010101	3.18075	9.1896e-07	up
MS.gene94210	2.24061	9.60611e-07	up
MS.gene28678	2.03724	9.67361e-07	up
MS.gene023961	3.21514	9.71504e-07	up
MS.gene021392	2.12752	9.84467e-07	up
MS.gene057126	2.41953	9.84931e-07	up
MS.gene004958	3.77585	9.88909e-07	up
MS.gene010716	2.9317	9.89725e-07	up
MS.gene022576	2.39227	1.0377e-06	up
MS.gene021719	3.73984	1.04935e-06	up
MS.gene99928	6.8011	1.05517e-06	up
MS.gene008376	2.3565	1.07163e-06	up
MS.gene34643	5.1709	1.08321e-06	up
MS.gene068788	2.06006	1.08764e-06	up
MS.gene23881	2.95769	1.09447e-06	up
MS.gene28427	3.49636	1.09877e-06	up
MS.gene052316	7.02268	1.17918e-06	up
MS.gene002688	2.85081	1.2022e-06	up
MS.gene23016	2.36264	1.2115e-06	up
MS.gene065226	3.06593	1.23492e-06	up
MS.gene78397	7.29488	1.2392e-06	up
MS.gene050534	2.42096	1.24534e-06	up
MS.gene57914	4.05323	1.24811e-06	up
MS.gene23771	6.93695	1.24967e-06	up
MS.gene38684	2.17058	1.26769e-06	up
MS.gene014245	2.44272	1.2696e-06	up
MS.gene49106	2.09531	1.28246e-06	up
MS.gene013405	2.36799	1.29898e-06	up
MS.gene98522	5.8972	1.36469e-06	up
MS.gene051064	3.37424	1.38091e-06	up
MS.gene81587	2.32692	1.38954e-06	up
MS.gene54656	2.74564	1.39221e-06	up
MS.gene061812	3.61138	1.39251e-06	up
MS.gene036289	3.72897	1.4233e-06	up
MS.gene051624	3.01974	1.51512e-06	up
MS.gene52707	4.59838	1.52114e-06	up
MS.gene72392	3.6853	1.52216e-06	up
MS.gene68797	2.29942	1.56182e-06	up
MS.gene94198	3.26756	1.57833e-06	up
MS.gene98143	2.07834	1.60544e-06	up
MS.gene068618	2.48843	1.62948e-06	up
MS.gene014584	2.30165	1.662e-06	up
MS.gene070813	2.84798	1.69553e-06	up
MS.gene57674	3.88047	1.70129e-06	up
MS.gene38672	5.98444	1.7353e-06	up
MS.gene002902	2.01754	1.7452e-06	up
MS.gene87630	3.126	1.74561e-06	up
MS.gene71379	2.22066	1.75764e-06	up
MS.gene016778	2.1839	1.77293e-06	up
MS.gene045983	2.2425	1.7976e-06	up
MS.gene38663	6.96695	1.80131e-06	up
MS.gene49715	7.03916	1.88548e-06	up
MS.gene042634	2.02161	1.90102e-06	up
MS.gene037018	2.06699	1.90927e-06	up
MS.gene017246	2.38805	1.92663e-06	up
MS.gene029015	6.90561	1.92746e-06	up
MS.gene03821	4.26217	1.98711e-06	up
MS.gene78758	2.28862	2.00264e-06	up
MS.gene92539	3.07757	2.05339e-06	up
MS.gene030659	4.88978	2.06714e-06	up
MS.gene09599	2.65147	2.08745e-06	up
MS.gene04461	2.63608	2.0926e-06	up
MS.gene36287	7.00221	2.11154e-06	up
MS.gene09135	3.1147	2.11154e-06	up
MS.gene008947	3.60845	2.14191e-06	up
MS.gene38439	4.42198	2.1471e-06	up
MS.gene71387	2.24785	2.2351e-06	up
MS.gene99776	2.06801	2.2379e-06	up
MS.gene06388	3.10808	2.27267e-06	up
MS.gene99889	2.05267	2.29005e-06	up
MS.gene062938	3.65985	2.39279e-06	up
MS.gene86510	3.71754	2.42044e-06	up
MS.gene88981	2.63746	2.50353e-06	up
MS.gene06329	2.64284	2.58345e-06	up
MS.gene54139	2.58735	2.59758e-06	up
MS.gene85582	2.36592	2.6421e-06	up
MS.gene022278	4.6182	2.70592e-06	up
MS.gene67999	2.39625	2.7785e-06	up
MS.gene63905	2.02066	2.79211e-06	up
MS.gene008563	5.17629	2.87744e-06	up
MS.gene01695	2.65815	2.88343e-06	up
MS.gene023854	3.3699	2.8889e-06	up
MS.gene98858	3.00408	2.99194e-06	up
MS.gene022296	2.05476	2.99877e-06	up
MS.gene068993	3.35093	3.03264e-06	up
MS.gene028763	2.37338	3.09664e-06	up
MS.gene83630	5.74209	3.13441e-06	up
MS.gene068413	4.19712	3.16956e-06	up
MS.gene017075	3.89906	3.27137e-06	up
MS.gene20923	3.74283	3.35142e-06	up
MS.gene46686	6.68985	3.35142e-06	up
MS.gene053776	3.23705	3.38268e-06	up
MS.gene012677	2.09592	3.40056e-06	up
MS.gene070285	2.26871	3.44009e-06	up
MS.gene036025	2.44097	3.47171e-06	up
MS.gene82140	2.21008	3.55667e-06	up
MS.gene42333	2.15984	3.60737e-06	up
MS.gene002998	6.55112	3.61277e-06	up
MS.gene031902	4.07295	3.88039e-06	up
MS.gene01868	6.29965	4.01259e-06	up
MS.gene23364	2.74892	4.07042e-06	up
MS.gene043464	3.57518	4.09114e-06	up
MS.gene031881	2.38217	4.15584e-06	up
MS.gene068423	4.86674	4.19465e-06	up
MS.gene026758	2.9087	4.2069e-06	up
MS.gene77231	2.02445	4.23591e-06	up
MS.gene85778	2.77033	4.31783e-06	up
MS.gene011337	2.83908	4.36907e-06	up
MS.gene30034	2.08379	4.38387e-06	up
MS.gene00875	2.22653	4.40828e-06	up
MS.gene61470	2.76281	4.49308e-06	up
MS.gene73217	2.46512	4.6084e-06	up
MS.gene065541	4.00239	4.76174e-06	up
MS.gene34046	2.11857	4.82825e-06	up
MS.gene42238	2.00134	5.09025e-06	up
MS.gene029386	2.63056	5.09125e-06	up
MS.gene65939	2.21395	5.20647e-06	up
MS.gene019917	3.69035	5.21841e-06	up
MS.gene74706	2.28199	5.25898e-06	up
MS.gene72693	2.2794	5.37631e-06	up
MS.gene56650	2.01239	5.42677e-06	up
MS.gene70257	4.33068	5.50287e-06	up
MS.gene041159	4.25165	5.5289e-06	up
MS.gene031018	2.41839	5.65709e-06	up
MS.gene013956	2.52242	5.69854e-06	up
MS.gene011847	2.86932	5.74608e-06	up
MS.gene008011	4.54227	6.1235e-06	up
MS.gene70174	6.7217	6.13498e-06	up
MS.gene59624	3.33861	6.16795e-06	up
MS.gene46378	4.33288	6.19048e-06	up
MS.gene68553	3.34831	6.21848e-06	up
MS.gene65646	2.28259	6.22381e-06	up
MS.gene30763	3.26029	6.28871e-06	up
MS.gene013007	3.76138	6.34548e-06	up
MS.gene95553	2.44001	6.41356e-06	up
MS.gene30762	3.93032	6.44697e-06	up
MS.gene64450	2.79362	6.47528e-06	up
MS.gene004059	6.72054	6.54207e-06	up
MS.gene59670	3.43684	6.56936e-06	up
MS.gene74686	2.26464	6.75325e-06	up
MS.gene54078	2.62911	6.81134e-06	up
MS.gene056164	2.18265	6.86157e-06	up
MS.gene67361	2.5079	6.9377e-06	up
MS.gene009536	2.0187	6.94204e-06	up
MS.gene69633	2.00073	6.94558e-06	up
MS.gene069129	3.08125	7.07621e-06	up
MS.gene070277	7.17595	7.17677e-06	up
MS.gene72667	5.90883	7.25982e-06	up
MS.gene71851	5.67872	7.86551e-06	up
MS.gene043365	3.32659	7.98119e-06	up
MS.gene98698	2.99523	8.03597e-06	up
MS.gene032179	2.61284	8.07793e-06	up
MS.gene59217	2.80374	8.10369e-06	up
MS.gene047647	2.74099	8.25646e-06	up
MS.gene31664	2.21709	8.30677e-06	up
MS.gene31844	2.53876	8.37367e-06	up
MS.gene95741	3.57431	8.55733e-06	up
MS.gene056101	2.16603	8.75436e-06	up
MS.gene36456	6.68193	8.82386e-06	up
MS.gene27592	3.33897	8.84696e-06	up
MS.gene47470	2.06568	8.87909e-06	up
MS.gene056473	2.01559	8.91512e-06	up
MS.gene050823	2.38106	8.95467e-06	up
MS.gene047107	2.07003	9.05598e-06	up
MS.gene013400	2.99991	9.13826e-06	up
MS.gene049677	2.41814	9.14507e-06	up
MS.gene86714	2.0672	1.02815e-05	up
MS.gene028990	3.06854	1.02884e-05	up
MS.gene78148	5.27984	1.04935e-05	up
MS.gene66471	4.41622	1.05258e-05	up
MS.gene58518	2.83229	1.06057e-05	up
MS.gene96791	2.42788	1.07395e-05	up
MS.gene68075	2.21012	1.07843e-05	up
MS.gene025181	5.00925	1.09448e-05	up
MS.gene34993	2.1104	1.13732e-05	up
MS.gene003931	2.35592	1.14137e-05	up
MS.gene026712	2.7132	1.18094e-05	up
MS.gene012253	2.76383	1.18372e-05	up
MS.gene058751	2.02446	1.18728e-05	up
MS.gene073762	2.11152	1.1875e-05	up
MS.gene049666	2.31119	1.19277e-05	up
MS.gene86129	2.14868	1.19996e-05	up
MS.gene054760	2.01836	1.22809e-05	up
MS.gene007294	2.06368	1.25104e-05	up
MS.gene50270	2.09318	1.26452e-05	up
MS.gene006790	2.62697	1.27584e-05	up
MS.gene56685	2.20485	1.28277e-05	up
MS.gene037807	4.72841	1.30925e-05	up
MS.gene64911	2.23411	1.33178e-05	up
MS.gene067401	2.52248	1.36146e-05	up
MS.gene027801	2.40758	1.40919e-05	up
MS.gene46368	3.16545	1.41524e-05	up
MS.gene67110	6.29651	1.43388e-05	up
MS.gene87649	6.92147	1.46436e-05	up
MS.gene073982	2.15917	1.46727e-05	up
MS.gene02641	2.56774	1.5004e-05	up
MS.gene040105	4.21744	1.51773e-05	up
MS.gene56124	2.26207	1.51773e-05	up
MS.gene49973	2.42997	1.52452e-05	up
MS.gene014524	2.84679	1.52548e-05	up
MS.gene052453	6.66368	1.54262e-05	up
MS.gene03306	6.59972	1.56166e-05	up
MS.gene39488	2.76434	1.56901e-05	up
MS.gene062852	3.2652	1.58988e-05	up
MS.gene004947	5.6475	1.67229e-05	up
MS.gene30486	3.14616	1.67256e-05	up
MS.gene009646	2.36637	1.67826e-05	up
MS.gene67224	2.34075	1.6783e-05	up
MS.gene026360	2.16702	1.68713e-05	up
MS.gene28561	3.19572	1.69709e-05	up
MS.gene47369	2.29796	1.69873e-05	up
MS.gene052905	4.81435	1.71807e-05	up
MS.gene042358	2.03937	1.71919e-05	up
MS.gene025175	4.7175	1.75405e-05	up
MS.gene74975	2.20638	1.76199e-05	up
MS.gene002294	4.93088	1.8357e-05	up
MS.gene96572	2.56623	1.84072e-05	up
MS.gene70256	6.42216	1.90844e-05	up
MS.gene026881	2.65444	1.92983e-05	up
MS.gene37380	2.21511	2.03636e-05	up
MS.gene026697	2.20071	2.05359e-05	up
MS.gene74443	6.3273	2.15244e-05	up
MS.gene057304	7.31322	2.20315e-05	up
MS.gene01055	6.77838	2.24024e-05	up
MS.gene61708	6.68203	2.24397e-05	up
MS.gene052421	6.53144	2.3292e-05	up
MS.gene57451	2.78995	2.35674e-05	up
MS.gene006481	5.46671	2.39298e-05	up
MS.gene043478	3.82263	2.4106e-05	up
MS.gene027859	6.2011	2.41839e-05	up
MS.gene054900	2.2971	2.45073e-05	up
MS.gene07505	3.05079	2.45565e-05	up
MS.gene032032	2.26157	2.48002e-05	up
MS.gene92212	2.43522	2.48366e-05	up
MS.gene08191	3.63964	2.51648e-05	up
MS.gene031929	3.67467	2.52846e-05	up
MS.gene043271	3.08963	2.62991e-05	up
MS.gene35923	2.82519	2.66559e-05	up
MS.gene25243	4.57411	2.6804e-05	up
MS.gene74689	2.04954	2.71446e-05	up
MS.gene037458	2.06003	2.83662e-05	up
MS.gene26673	4.74313	2.84623e-05	up
MS.gene31013	2.79184	2.8749e-05	up
MS.gene027325	2.2965	2.91653e-05	up
MS.gene63309	2.20085	2.91778e-05	up
MS.gene021340	6.62366	2.91897e-05	up
MS.gene00178	2.08577	2.92681e-05	up
MS.gene60292	6.38744	2.93397e-05	up
MS.gene89018	3.28535	2.99872e-05	up
MS.gene049757	2.34986	3.02823e-05	up
MS.gene60315	2.01141	3.09752e-05	up
MS.gene75804	2.15315	3.11719e-05	up
MS.gene002997	3.20537	3.22147e-05	up
MS.gene021669	2.52174	3.27211e-05	up
MS.gene59827	3.13849	3.27747e-05	up
MS.gene070685	2.08365	3.30116e-05	up
MS.gene030653	3.80665	3.40738e-05	up
MS.gene027886	2.15489	3.45628e-05	up
MS.gene74549	3.01772	3.4925e-05	up
MS.gene56537	2.64143	3.51247e-05	up
MS.gene000446	2.08688	3.63372e-05	up
MS.gene42177	2.65867	3.70219e-05	up
MS.gene59480	3.01072	3.71507e-05	up
MS.gene48878	2.31527	3.74434e-05	up
MS.gene048571	2.62391	3.75092e-05	up
MS.gene56813	4.50936	3.8881e-05	up
MS.gene021394	2.23923	3.91657e-05	up
MS.gene027406	2.59733	3.91953e-05	up
MS.gene048128	5.07427	3.99232e-05	up
MS.gene56389	2.27133	4.01812e-05	up
MS.gene003403	2.3104	4.08284e-05	up
MS.gene86397	2.53029	4.10837e-05	up
MS.gene014391	4.03254	4.16656e-05	up
MS.gene50880	2.54993	4.18855e-05	up
MS.gene062192	5.8585	4.23462e-05	up
MS.gene50710	2.57297	4.24176e-05	up
MS.gene044307	4.11168	4.26907e-05	up
MS.gene87741	3.43333	4.27863e-05	up
MS.gene31822	2.27513	4.27914e-05	up
MS.gene70894	3.32441	4.31308e-05	up
MS.gene023532	2.5003	4.40014e-05	up
MS.gene20447	2.26607	4.41049e-05	up
MS.gene01061	2.46809	4.57282e-05	up
MS.gene005641	2.57757	4.58152e-05	up
MS.gene027823	2.19604	4.61951e-05	up
MS.gene94151	3.17299	4.73265e-05	up
MS.gene013406	2.70794	4.7693e-05	up
MS.gene21018	2.32578	4.79389e-05	up
MS.gene026885	2.19542	4.99385e-05	up
MS.gene016066	2.07922	5.04374e-05	up
MS.gene026689	2.95272	5.07976e-05	up
MS.gene022067	2.21578	5.16326e-05	up
MS.gene006043	3.10299	5.17618e-05	up
MS.gene50718	3.04211	5.2605e-05	up
MS.gene39883	2.56017	5.35881e-05	up
MS.gene56007	2.03416	5.36742e-05	up
MS.gene061585	3.99606	5.43012e-05	up
MS.gene46499	2.03345	5.4713e-05	up
MS.gene35251	3.33873	5.5034e-05	up
MS.gene97222	2.65983	5.56016e-05	up
MS.gene06140	2.02614	5.57242e-05	up
MS.gene013139	2.39702	5.90015e-05	up
MS.gene071085	2.12816	6.12604e-05	up
MS.gene013243	2.99338	6.14205e-05	up
MS.gene08834	6.37988	6.15919e-05	up
MS.gene74967	3.37044	6.22002e-05	up
MS.gene34335	2.26993	6.46752e-05	up
MS.gene83032	3.17381	6.49749e-05	up
MS.gene56000	2.83107	6.53653e-05	up
MS.gene92677	2.2963	6.54128e-05	up
MS.gene058375	2.78027	6.54229e-05	up
MS.gene021500	3.95285	6.54861e-05	up
MS.gene37958	6.85314	6.55389e-05	up
MS.gene65734	2.11944	6.71948e-05	up
MS.gene028969	2.80622	7.13294e-05	up
MS.gene32447	3.03961	7.2172e-05	up
MS.gene010193	2.19454	7.23566e-05	up
MS.gene35123	3.07621	7.28189e-05	up
MS.gene32324	2.41808	7.30739e-05	up
MS.gene029352	2.09298	7.353e-05	up
MS.gene072706	2.06764	7.44257e-05	up
MS.gene83458	2.93307	7.63302e-05	up
MS.gene97738	2.26662	7.74125e-05	up
MS.gene051366	2.31602	7.81446e-05	up
MS.gene61711	6.36084	7.86542e-05	up
MS.gene002753	2.05552	7.94288e-05	up
MS.gene83611	2.44617	7.95433e-05	up
MS.gene003357	3.57004	8.06903e-05	up
MS.gene002924	2.54919	8.14008e-05	up
MS.gene038461	3.46255	8.14008e-05	up
MS.gene81898	2.09152	8.71521e-05	up
MS.gene36926	3.21434	8.88255e-05	up
MS.gene76610	3.11905	8.91737e-05	up
MS.gene01505	2.92882	9.15769e-05	up
MS.gene86884	2.79224	9.1864e-05	up
MS.gene48043	3.2499	9.19934e-05	up
MS.gene014350	2.07503	9.26626e-05	up
MS.gene86207	2.61174	9.4729e-05	up
MS.gene010409	2.25925	9.81099e-05	up
MS.gene65126	2.01473	9.81577e-05	up
MS.gene86288	3.05328	9.8744e-05	up
MS.gene007749	4.00212	0.000101304	up
MS.gene033298	3.28424	0.00011034	up
MS.gene86782	2.95723	0.000110696	up
MS.gene21394	2.60807	0.000110809	up
MS.gene35736	2.08333	0.000111344	up
MS.gene80374	6.01921	0.000111784	up
MS.gene20709	3.64502	0.000113021	up
MS.gene07213	2.70333	0.000113332	up
MS.gene08489	5.29875	0.000113598	up
MS.gene072060	2.11574	0.000115011	up
MS.gene42049	4.19113	0.000115083	up
MS.gene43940	2.79668	0.000117497	up
MS.gene92811	2.16897	0.000118004	up
MS.gene36998	5.12757	0.000120255	up
MS.gene024376	3.06526	0.000120314	up
MS.gene04215	2.46243	0.000120983	up
MS.gene000652	4.61024	0.000121416	up
MS.gene060491	2.25423	0.00012195	up
MS.gene80612	2.63006	0.000124681	up
MS.gene073308	6.42148	0.000124804	up
MS.gene027083	2.12545	0.000126723	up
MS.gene20448	2.12224	0.000128041	up
MS.gene070821	2.24706	0.000129884	up
MS.gene047052	3.01517	0.000130916	up
MS.gene90567	2.61349	0.000132192	up
MS.gene25071	3.92979	0.00013296	up
MS.gene046388	6.04895	0.000134429	up
MS.gene067172	2.88214	0.000135652	up
MS.gene44134	3.10157	0.000136792	up
MS.gene044354	5.17694	0.000139234	up
MS.gene021869	2.3984	0.000144018	up
MS.gene40798	2.17298	0.000145097	up
MS.gene26930	2.89245	0.000145159	up
MS.gene047932	2.93833	0.000145979	up
MS.gene012669	3.68886	0.000146894	up
MS.gene047697	4.40032	0.000147902	up
MS.gene04013	2.05621	0.000151171	up
MS.gene09137	2.79601	0.000155048	up
MS.gene20958	2.19947	0.000157067	up
MS.gene029621	2.7648	0.000160249	up
MS.gene018218	2.22683	0.000161106	up
MS.gene021955	3.70626	0.00016144	up
MS.gene90140	5.21882	0.000162862	up
MS.gene039679	3.09651	0.000164225	up
MS.gene002566	5.99303	0.000168701	up
MS.gene36549	2.57139	0.000169551	up
MS.gene64899	3.42051	0.000169717	up
MS.gene01681	3.29329	0.000169822	up
MS.gene74495	2.94831	0.000174766	up
MS.gene011629	2.17788	0.000177708	up
MS.gene79731	3.42961	0.000178793	up
MS.gene06818	2.47699	0.000183176	up
MS.gene027467	2.44169	0.000183579	up
MS.gene027465	2.36467	0.000184298	up
MS.gene91792	3.14944	0.000186047	up
MS.gene67931	4.24271	0.000187518	up
MS.gene32184	2.94659	0.000190287	up
MS.gene43675	2.48045	0.000191309	up
MS.gene76350	3.29138	0.000191494	up
MS.gene61318	3.85533	0.000191494	up
MS.gene051623	2.4824	0.000192254	up
MS.gene99665	2.49825	0.000193814	up
MS.gene031499	2.70956	0.000195369	up
MS.gene043947	4.74161	0.000197235	up
MS.gene041089	2.4884	0.000198502	up
MS.gene01552	2.36216	0.000198628	up
MS.gene029262	2.35629	0.000201514	up
MS.gene30696	2.55763	0.000203256	up
MS.gene92732	2.87009	0.000204169	up
MS.gene33745	2.4693	0.000205552	up
MS.gene66606	5.72161	0.000206975	up
MS.gene007266	2.53014	0.000216448	up
MS.gene059489	2.18804	0.000224442	up
MS.gene47991	6.77737	0.000224555	up
MS.gene040168	2.06337	0.00022528	up
MS.gene023821	2.35777	0.000231573	up
MS.gene88673	2.86491	0.000240601	up
MS.gene20251	2.49733	0.000242366	up
MS.gene67499	2.89337	0.000244928	up
MS.gene28425	4.46422	0.00024553	up
MS.gene23272	5.49884	0.000247772	up
MS.gene047636	2.24742	0.000249645	up
MS.gene45929	2.58705	0.00025031	up
MS.gene018274	3.0268	0.000251035	up
MS.gene79238	3.82696	0.000251229	up
MS.gene024576	2.88684	0.000251302	up
MS.gene024347	3.11673	0.00025184	up
MS.gene68384	2.18584	0.00025289	up
MS.gene20054	3.26031	0.000252897	up
MS.gene39217	4.77537	0.000253722	up
MS.gene072212	2.75775	0.000254352	up
MS.gene059112	2.16525	0.000254361	up
MS.gene72034	2.38934	0.000260584	up
MS.gene015043	2.17502	0.000263567	up
MS.gene82196	3.41087	0.000264414	up
MS.gene33189	4.04692	0.000265963	up
MS.gene000540	2.53005	0.000267211	up
MS.gene86307	2.14475	0.000268575	up
MS.gene017560	4.1836	0.000270892	up
MS.gene55051	3.29762	0.000270892	up
MS.gene24453	5.74535	0.000273394	up
MS.gene32345	2.67886	0.000274065	up
MS.gene012659	2.3519	0.00027647	up
MS.gene007981	5.63307	0.000279212	up
MS.gene026612	2.3933	0.000280766	up
MS.gene49143	2.5186	0.00028508	up
MS.gene94966	2.0432	0.000296392	up
MS.gene018226	2.4271	0.000297037	up
MS.gene061922	3.15733	0.000297509	up
MS.gene072770	3.16374	0.00030041	up
MS.gene001063	5.99333	0.00030231	up
MS.gene057466	5.5069	0.000305089	up
MS.gene051648	2.01501	0.000308218	up
MS.gene52814	2.82108	0.00031131	up
MS.gene062583	2.31416	0.000314055	up
MS.gene89061	2.1442	0.000314516	up
MS.gene014979	2.19372	0.000316161	up
MS.gene60797	2.24958	0.000318222	up
MS.gene72872	5.76644	0.000319945	up
MS.gene09550	2.34557	0.000320818	up
MS.gene02608	5.75021	0.000320818	up
MS.gene96813	2.79895	0.000323965	up
MS.gene70931	2.26981	0.000325054	up
MS.gene00781	5.4721	0.000326705	up
MS.gene047642	2.23009	0.000327185	up
MS.gene012777	3.57498	0.000332179	up
MS.gene001424	2.28735	0.00034394	up
MS.gene058170	2.20877	0.000347479	up
MS.gene021395	2.3127	0.000349979	up
MS.gene36739	2.39629	0.000350368	up
MS.gene56594	2.47855	0.00035257	up
MS.gene86530	4.82943	0.000353875	up
MS.gene067901	2.05371	0.000356996	up
MS.gene012719	2.48687	0.000357096	up
MS.gene73108	2.65409	0.000360955	up
MS.gene08487	3.02543	0.000364627	up
MS.gene046429	3.15419	0.000370587	up
MS.gene26982	2.92785	0.000370813	up
MS.gene42317	2.99203	0.00037646	up
MS.gene017360	2.13192	0.000377343	up
MS.gene02730	2.95104	0.000377629	up
MS.gene015032	4.75823	0.000378557	up
MS.gene043241	2.59705	0.000380576	up
MS.gene76380	5.98729	0.000389412	up
MS.gene46922	3.29067	0.000390815	up
MS.gene28632	4.28775	0.000393304	up
MS.gene91606	2.9598	0.000398669	up
MS.gene43135	2.06118	0.000404336	up
MS.gene32652	2.59632	0.000410554	up
MS.gene049539	2.20766	0.000412338	up
MS.gene049115	2.13753	0.000414293	up
MS.gene017679	2.27521	0.000415396	up
MS.gene042159	2.02604	0.000428376	up
MS.gene029430	2.0622	0.000431494	up
MS.gene56505	2.77965	0.000447565	up
MS.gene032762	2.05314	0.00045787	up
MS.gene62413	2.28095	0.000459248	up
MS.gene016940	2.02298	0.000460875	up
MS.gene007615	3.36005	0.000463883	up
MS.gene029858	5.39189	0.000464627	up
MS.gene021696	3.03932	0.000466044	up
MS.gene65833	2.21019	0.000468557	up
MS.gene004231	3.49171	0.000471973	up
MS.gene057680	2.12833	0.000474207	up
MS.gene33310	2.90579	0.000474572	up
MS.gene03820	3.16289	0.000478562	up
MS.gene065216	2.03055	0.000480194	up
MS.gene47898	4.10574	0.00048243	up
MS.gene28063	2.57646	0.000484836	up
MS.gene76902	2.09426	0.000484944	up
MS.gene77673	2.2782	0.000489745	up
MS.gene041878	4.03425	0.000493303	up
MS.gene85907	2.41111	0.000495789	up
MS.gene010370	5.68268	0.000497297	up
MS.gene95107	4.7547	0.000501954	up
MS.gene26560	2.00047	0.000506976	up
MS.gene033755	2.00253	0.000511438	up
MS.gene73067	2.058	0.000511465	up
MS.gene06605	2.57498	0.000517419	up
MS.gene074374	4.33106	0.000519632	up
MS.gene44378	2.2621	0.000521698	up
MS.gene39628	2.85504	0.000522415	up
MS.gene01819	2.33307	0.000524332	up
MS.gene042111	2.57534	0.000529504	up
MS.gene036272	5.95075	0.000536312	up
MS.gene51365	2.06127	0.00053734	up
MS.gene36992	3.69363	0.000546668	up
MS.gene78631	2.36184	0.000547131	up
MS.gene69326	2.08805	0.000553787	up
MS.gene79577	3.0385	0.000554059	up
MS.gene71318	2.2596	0.000567946	up
MS.gene058435	2.96755	0.00058264	up
MS.gene27326	2.54653	0.00058292	up
MS.gene043355	4.45889	0.00058941	up
MS.gene01013	6.21152	0.000598157	up
MS.gene023548	5.04575	0.00059858	up
MS.gene28114	4.35604	0.000603087	up
MS.gene052043	2.46051	0.000611223	up
MS.gene38738	2.74796	0.000612689	up
MS.gene61232	4.00406	0.000619159	up
MS.gene066798	2.04235	0.000625496	up
MS.gene35653	2.72593	0.000625815	up
MS.gene51367	2.32195	0.000626072	up
MS.gene029580	2.01413	0.000628171	up
MS.gene26162	2.21108	0.000629129	up
MS.gene074473	2.40148	0.000634517	up
MS.gene042643	3.20334	0.000644786	up
MS.gene59860	2.69484	0.000647641	up
MS.gene08277	2.14841	0.000650007	up
MS.gene58519	2.70142	0.00065107	up
MS.gene35218	2.45138	0.00065669	up
MS.gene98254	2.75633	0.000669081	up
MS.gene011273	2.30337	0.000669225	up
MS.gene28044	3.1432	0.000673966	up
MS.gene029615	2.52663	0.000676839	up
MS.gene051201	6.33813	0.000678176	up
MS.gene011944	5.91267	0.000683436	up
MS.gene002552	2.01045	0.000690502	up
MS.gene04362	6.01522	0.000690633	up
MS.gene81689	4.4883	0.00069951	up
MS.gene049214	2.72149	0.000704857	up
MS.gene004239	4.01826	0.000707418	up
MS.gene31419	4.47844	0.000714518	up
MS.gene047637	2.25613	0.000716426	up
MS.gene40636	2.73861	0.000717929	up
MS.gene061116	6.49132	0.000719032	up
MS.gene22522	6.19855	0.00071938	up
MS.gene005711	2.73907	0.000719702	up
MS.gene051621	2.11025	0.000720959	up
MS.gene038685	6.19512	0.000721593	up
MS.gene067404	2.18502	0.000722344	up
MS.gene055629	2.14558	0.000726539	up
MS.gene04591	3.27734	0.000729304	up
MS.gene051057	3.11058	0.000732754	up
MS.gene047643	2.07985	0.000733235	up
MS.gene60035	5.52565	0.000740615	up
MS.gene86108	2.39505	0.000740902	up
MS.gene036273	6.30163	0.00074211	up
MS.gene66969	2.39149	0.000763493	up
MS.gene043315	2.65001	0.000765331	up
MS.gene015996	5.79494	0.00077089	up
MS.gene95755	4.57548	0.000772111	up
MS.gene023741	5.72413	0.000778671	up
MS.gene027958	2.09513	0.000779715	up
MS.gene90437	5.01367	0.000782094	up
MS.gene028841	3.55695	0.000783987	up
MS.gene015348	2.0438	0.000787092	up
MS.gene01208	2.36563	0.0007896	up
MS.gene061137	2.16873	0.000791469	up
MS.gene025197	4.26891	0.000799447	up
MS.gene070491	5.58372	0.000805307	up
MS.gene028141	5.72359	0.000809611	up
MS.gene011168	2.16373	0.000826982	up
MS.gene92158	2.27162	0.000830997	up
MS.gene09748	2.17469	0.000833705	up
MS.gene063962	2.66647	0.000843232	up
MS.gene067823	3.93635	0.000844194	up
MS.gene019763	5.13508	0.000848877	up
MS.gene029391	2.24847	0.000852387	up
MS.gene26252	3.41873	0.000855531	up
MS.gene51093	2.85503	0.000857298	up
MS.gene064837	2.39394	0.000861278	up
MS.gene28426	2.69142	0.000862199	up
MS.gene035019	2.6335	0.000866273	up
MS.gene073778	4.13286	0.000871476	up
MS.gene013694	2.30091	0.000880385	up
MS.gene02738	2.95547	0.000882502	up
MS.gene27669	2.29092	0.000883067	up
MS.gene49991	2.1524	0.000892122	up
MS.gene024698	2.95037	0.000898782	up
MS.gene74082	2.6592	0.000913013	up
MS.gene72073	2.75401	0.000914986	up
MS.gene94932	2.017	0.000915994	up
MS.gene022110	2.00674	0.000921537	up
MS.gene54461	2.03299	0.000932552	up
MS.gene02291	2.47218	0.000935014	up
MS.gene76558	2.83778	0.000938135	up
MS.gene065074	2.10043	0.000970016	up
MS.gene045033	4.25939	0.000978943	up
MS.gene035059	3.444	0.000986327	up
MS.gene053479	2.35571	0.00100594	up
MS.gene060387	2.61541	0.00101077	up
MS.gene028351	2.00446	0.00102918	up
MS.gene30169	3.19324	0.00102918	up
MS.gene94179	6.137	0.00103409	up
MS.gene75469	2.42738	0.00104112	up
MS.gene011708	2.74366	0.0010434	up
MS.gene83839	5.31713	0.00104709	up
MS.gene70696	2.29624	0.00104901	up
MS.gene98208	2.79411	0.00105052	up
MS.gene24904	2.35444	0.00106459	up
MS.gene32841	5.48563	0.00108497	up
MS.gene09962	2.24819	0.00108947	up
MS.gene27194	2.7472	0.00109301	up
MS.gene56189	3.86884	0.00109777	up
MS.gene010412	5.22367	0.0011061	up
MS.gene015436	2.31138	0.00111541	up
MS.gene31532	2.14437	0.00112134	up
MS.gene06451	5.32114	0.00112862	up
MS.gene53840	3.54069	0.00119336	up
MS.gene81918	3.64692	0.00121087	up
MS.gene90698	3.16655	0.00122603	up
MS.gene067325	5.19801	0.00124903	up
MS.gene97788	2.43491	0.00127953	up
MS.gene008007	2.1555	0.00131462	up
MS.gene04882	6.42824	0.00131481	up
MS.gene027733	5.1317	0.00131512	up
MS.gene98185	2.37247	0.00131587	up
MS.gene023550	2.31356	0.00131834	up
MS.gene44127	2.96662	0.0013305	up
MS.gene002507	3.3046	0.00134842	up
MS.gene014743	3.17444	0.00135214	up
MS.gene037842	2.91422	0.00135436	up
MS.gene00991	4.86252	0.00135453	up
MS.gene028860	5.1689	0.00136165	up
MS.gene44479	2.4741	0.00138959	up
MS.gene021423	3.56683	0.00139316	up
MS.gene94291	3.34389	0.00139458	up
MS.gene82449	3.16425	0.00141725	up
MS.gene028253	2.71661	0.00142168	up
MS.gene070482	2.18256	0.00142367	up
MS.gene27707	2.89987	0.00142524	up
MS.gene95459	2.31454	0.00143493	up
MS.gene042167	2.29001	0.0014585	up
MS.gene006841	5.65252	0.00146514	up
MS.gene84754	6.03458	0.00149387	up
MS.gene004809	2.65759	0.0014954	up
MS.gene052071	2.03136	0.00149996	up
MS.gene36008	2.49397	0.00150121	up
MS.gene21366	3.28536	0.00150244	up
MS.gene86203	4.18939	0.00151471	up
MS.gene75080	4.73636	0.00151471	up
MS.gene00167	2.93945	0.00152112	up
MS.gene06352	2.06513	0.00152501	up
MS.gene05887	5.72471	0.00153117	up
MS.gene40891	3.36992	0.00153477	up
MS.gene01738	3.86996	0.00153529	up
MS.gene070191	2.20198	0.00153568	up
MS.gene015309	5.42459	0.00153864	up
MS.gene47380	5.1906	0.00154445	up
MS.gene005023	2.15237	0.00155281	up
MS.gene81983	2.13765	0.001561	up
MS.gene051332	3.29483	0.00156495	up
MS.gene89331	3.08554	0.00156581	up
MS.gene92580	2.59472	0.00158725	up
MS.gene00768	2.54386	0.00161677	up
MS.gene055989	2.95462	0.0016229	up
MS.gene060244	2.98031	0.00162371	up
MS.gene22342	2.80488	0.00163018	up
MS.gene78072	3.19058	0.0016349	up
MS.gene070122	2.90171	0.00164662	up
MS.gene55252	2.14393	0.00165451	up
MS.gene61610	5.42266	0.00165487	up
MS.gene50451	2.58819	0.00166682	up
MS.gene046319	2.75124	0.00167169	up
MS.gene064788	4.01032	0.00168064	up
MS.gene36624	2.2167	0.00170664	up
MS.gene59626	2.01545	0.00171466	up
MS.gene95513	5.63724	0.00172448	up
MS.gene031740	2.72023	0.00172535	up
MS.gene32913	5.77163	0.00174055	up
MS.gene56803	6.41888	0.00175043	up
MS.gene29327	4.25228	0.00175043	up
MS.gene25940	5.44248	0.00175386	up
MS.gene32514	2.34413	0.00177383	up
MS.gene76835	2.77106	0.00177578	up
MS.gene34255	2.40221	0.00177668	up
MS.gene036922	2.17682	0.00178586	up
MS.gene20595	5.30808	0.0017894	up
MS.gene045083	2.41436	0.00179884	up
MS.gene85483	2.49535	0.00180417	up
MS.gene064518	3.47709	0.00180734	up
MS.gene002754	3.5457	0.00182007	up
MS.gene018865	3.33512	0.001824	up
MS.gene036795	2.09957	0.00184621	up
MS.gene040995	2.06829	0.00184849	up
MS.gene38523	2.4927	0.00185625	up
MS.gene28482	6.16638	0.00188487	up
MS.gene27840	2.36407	0.00188762	up
MS.gene005898	2.05053	0.00189924	up
MS.gene99826	5.44518	0.00190171	up
MS.gene032623	2.81629	0.00190446	up
MS.gene022154	5.09682	0.00191232	up
MS.gene034949	2.07469	0.00191992	up
MS.gene00877	4.44238	0.00192254	up
MS.gene045088	5.8069	0.00192972	up
MS.gene022998	2.1436	0.00194027	up
MS.gene028032	5.30478	0.00194618	up
MS.gene045762	2.08527	0.00195422	up
MS.gene82152	2.40858	0.00198022	up
MS.gene015290	5.16403	0.00198488	up
MS.gene074371	4.43652	0.00199575	up
MS.gene68984	2.29373	0.00201494	up
MS.gene68200	2.54797	0.00201521	up
MS.gene55062	4.51182	0.00202794	up
MS.gene23925	3.13706	0.00203105	up
MS.gene022507	2.33083	0.00203413	up
MS.gene61495	2.91484	0.00203868	up
MS.gene020901	3.49753	0.00204013	up
MS.gene69979	2.55816	0.00204113	up
MS.gene83314	2.28996	0.00204823	up
MS.gene072763	3.0778	0.00209653	up
MS.gene86352	2.96371	0.00209988	up
MS.gene78760	4.53482	0.00211425	up
MS.gene90141	6.24993	0.00212254	up
MS.gene057209	5.50228	0.00212771	up
MS.gene02216	2.36637	0.00213077	up
MS.gene062854	2.2554	0.00214539	up
MS.gene042533	3.68652	0.00214653	up
MS.gene41880	2.57719	0.00215029	up
MS.gene52813	3.11761	0.0021554	up
MS.gene95893	5.21981	0.00217134	up
MS.gene002481	2.85052	0.00218883	up
MS.gene66887	2.03628	0.00219507	up
MS.gene35731	2.86466	0.00220497	up
MS.gene044316	2.05412	0.00222008	up
MS.gene065931	2.22498	0.00224648	up
MS.gene004393	2.12778	0.00224748	up
MS.gene064845	2.0714	0.00226318	up
MS.gene08987	5.32443	0.00228182	up
MS.gene03896	2.77701	0.00228557	up
MS.gene039688	2.0369	0.0022966	up
MS.gene30285	2.75651	0.00230606	up
MS.gene072911	2.05443	0.00230721	up
MS.gene021095	5.42172	0.00231577	up
MS.gene00153	5.64027	0.00234923	up
MS.gene013628	2.32241	0.00235242	up
MS.gene007388	2.01336	0.00236872	up
MS.gene052894	5.2814	0.0023691	up
MS.gene34412	2.08854	0.00237601	up
MS.gene067747	5.52955	0.00238634	up
MS.gene99341	2.06143	0.00239634	up
MS.gene010429	2.00461	0.00242748	up
MS.gene55999	2.87971	0.00242795	up
MS.gene50549	5.59853	0.00246825	up
MS.gene057697	2.6806	0.00247327	up
MS.gene29320	3.11371	0.00247327	up
MS.gene018708	2.29521	0.00249143	up
MS.gene010024	5.40303	0.00250327	up
MS.gene011125	3.18565	0.0025118	up
MS.gene039826	2.85269	0.00252295	up
MS.gene54347	3.12316	0.00255512	up
MS.gene08122	3.19505	0.00256804	up
MS.gene30912	5.31797	0.00257146	up
MS.gene030382	2.44603	0.00261766	up
MS.gene054858	2.62941	0.00262214	up
MS.gene011183	5.08867	0.00264383	up
MS.gene75620	5.04063	0.00264401	up
MS.gene014508	3.88673	0.00264831	up
MS.gene058155	2.02474	0.00264997	up
MS.gene88385	2.13327	0.00266011	up
MS.gene054159	2.32298	0.00267784	up
MS.gene60294	5.32415	0.00269411	up
MS.gene40231	2.39014	0.00271267	up
MS.gene26819	5.47821	0.00273286	up
MS.gene41668	2.81807	0.00273286	up
MS.gene054323	3.53371	0.00275165	up
MS.gene80194	6.06459	0.00282166	up
MS.gene42883	3.43291	0.0028391	up
MS.gene024113	5.22652	0.00284398	up
MS.gene03119	2.84682	0.00285905	up
MS.gene28430	3.9516	0.00286669	up
MS.gene65919	2.37024	0.00291058	up
MS.gene25078	2.79834	0.00291125	up
MS.gene30545	3.16109	0.00292535	up
MS.gene87320	3.12877	0.00293279	up
MS.gene011756	2.56794	0.00298551	up
MS.gene031892	2.517	0.00301822	up
MS.gene006464	2.61695	0.0030207	up
MS.gene58172	3.07285	0.00305605	up
MS.gene050689	2.10645	0.00305716	up
MS.gene061990	5.6426	0.003069	up
MS.gene54961	2.19806	0.00307612	up
MS.gene40839	2.57105	0.00308546	up
MS.gene009388	2.13798	0.00310056	up
MS.gene38760	5.37722	0.00316796	up
MS.gene50692	3.63062	0.00316838	up
MS.gene047969	2.19548	0.00317553	up
MS.gene062187	2.156	0.00318071	up
MS.gene92867	3.31381	0.00318113	up
MS.gene48855	3.06227	0.00318617	up
MS.gene016337	5.69759	0.00320927	up
MS.gene064617	3.0769	0.00322699	up
MS.gene87069	2.06883	0.00323195	up
MS.gene71091	3.7956	0.00324486	up
MS.gene82369	2.9988	0.00327027	up
MS.gene021397	4.53705	0.00327522	up
MS.gene009720	3.41113	0.00328738	up
MS.gene021474	5.97433	0.00329552	up
MS.gene00837	2.08227	0.00330717	up
MS.gene45501	2.26847	0.00331787	up
MS.gene65406	3.11495	0.00335361	up
MS.gene59708	2.54701	0.00337578	up
MS.gene040550	4.66379	0.00338856	up
MS.gene027209	2.11581	0.00341403	up
MS.gene028981	2.57037	0.00341462	up
MS.gene26932	2.98457	0.00341765	up
MS.gene85953	3.34981	0.00342489	up
MS.gene030657	4.96369	0.00343269	up
MS.gene028816	4.36283	0.00349043	up
MS.gene78335	2.17	0.00349154	up
MS.gene020997	2.72672	0.0034966	up
MS.gene058222	2.2734	0.00353718	up
MS.gene83588	4.29267	0.00360805	up
MS.gene055373	2.80636	0.00360851	up
MS.gene03274	2.51274	0.00362202	up
MS.gene76304	5.76465	0.00362917	up
MS.gene010223	2.44444	0.00364364	up
MS.gene55912	2.17632	0.00365385	up
MS.gene02084	2.31882	0.00366232	up
MS.gene044216	2.16486	0.00372377	up
MS.gene98170	2.18414	0.00373353	up
MS.gene55247	3.79005	0.00377034	up
MS.gene005767	2.10227	0.00377658	up
MS.gene66556	2.14578	0.0038063	up
MS.gene67437	4.3017	0.00386094	up
MS.gene014715	2.47769	0.00390201	up
MS.gene014489	5.17712	0.00392423	up
MS.gene030669	4.22749	0.00394831	up
MS.gene049015	2.42097	0.00395173	up
MS.gene98016	3.17919	0.00396202	up
MS.gene31707	2.30937	0.00401202	up
MS.gene047992	3.09393	0.00402135	up
MS.gene000298	2.15894	0.00402434	up
MS.gene57178	2.96661	0.00403461	up
MS.gene001752	2.38874	0.00404178	up
MS.gene000096	2.11533	0.00406243	up
MS.gene012313	2.30258	0.00409211	up
MS.gene65359	2.94335	0.00409979	up
MS.gene24612	2.05343	0.00411189	up
MS.gene83524	5.72503	0.0041374	up
MS.gene70611	4.42536	0.00415945	up
MS.gene014359	3.06246	0.00418326	up
MS.gene81768	2.90508	0.00422067	up
MS.gene60644	2.42079	0.00422559	up
MS.gene70253	3.04845	0.00423014	up
MS.gene015142	2.14194	0.00423455	up
MS.gene007441	3.53122	0.00425965	up
MS.gene76886	2.03291	0.00427848	up
MS.gene011992	2.32895	0.00427854	up
MS.gene065580	2.25685	0.00433464	up
MS.gene95134	3.21931	0.00437115	up
MS.gene56909	4.57823	0.00439221	up
MS.gene80789	5.27495	0.00440647	up
MS.gene62454	2.75953	0.00442059	up
MS.gene31529	4.75154	0.00443288	up
MS.gene78816	2.28896	0.00445436	up
MS.gene26110	2.55458	0.00445928	up
MS.gene77959	3.49447	0.00451332	up
MS.gene043362	2.29297	0.00453057	up
MS.gene75015	3.78039	0.00453527	up
MS.gene29647	4.12901	0.0045404	up
MS.gene28840	4.44678	0.00456923	up
MS.gene006150	3.4088	0.00458093	up
MS.gene07360	2.64826	0.0046011	up
MS.gene95555	5.43786	0.0046462	up
MS.gene038733	2.77383	0.00468791	up
MS.gene03477	2.18753	0.00475749	up
MS.gene72788	2.12065	0.00476209	up
MS.gene066281	3.49345	0.00478443	up
MS.gene00130	3.08745	0.00479481	up
MS.gene36835	3.22995	0.00480547	up
MS.gene82147	3.13752	0.00482067	up
MS.gene59884	2.06959	0.00482305	up
MS.gene070888	5.02064	0.00485696	up
MS.gene78154	2.20284	0.00486398	up
MS.gene043841	2.14849	0.00489429	up
MS.gene43045	2.41837	0.00490725	up
MS.gene53142	4.71934	0.00494656	up
MS.gene81406	3.49895	0.00494709	up
MS.gene61133	2.05769	0.00495894	up
MS.gene074471	5.39956	0.00496729	up
MS.gene002493	3.89547	0.00500254	up
MS.gene47653	2.08449	0.00502457	up
MS.gene015852	2.96842	0.00513203	up
MS.gene028252	4.04514	0.00521386	up
MS.gene54951	2.70563	0.00525926	up
MS.gene33862	5.02485	0.00526174	up
MS.gene004224	2.31544	0.00531403	up
MS.gene071849	2.63753	0.00532728	up
MS.gene016996	5.37065	0.00538183	up
MS.gene031840	3.34426	0.00538183	up
MS.gene56538	5.41837	0.00540911	up
MS.gene070483	2.63939	0.00542053	up
MS.gene89938	2.18566	0.00547194	up
MS.gene002443	2.2093	0.00549722	up
MS.gene44455	2.21196	0.0055294	up
MS.gene40209	3.33789	0.00571865	up
MS.gene36024	2.87265	0.00574361	up
MS.gene66155	3.11345	0.00579327	up
MS.gene021504	3.32605	0.00579365	up
MS.gene030759	2.22808	0.00586325	up
MS.gene013010	2.54387	0.00588957	up
MS.gene45050	3.88879	0.0059055	up
MS.gene028658	2.58121	0.00591637	up
MS.gene00772	3.61305	0.00592835	up
MS.gene018547	3.85315	0.00601551	up
MS.gene030839	2.37569	0.00602964	up
MS.gene00859	3.14121	0.00607396	up
MS.gene25790	3.27215	0.00607582	up
MS.gene021982	5.30116	0.00607992	up
MS.gene31383	2.55138	0.00612428	up
MS.gene22391	2.14088	0.00613319	up
MS.gene30089	3.04352	0.00614736	up
MS.gene039076	2.78694	0.00615225	up
MS.gene044034	2.39269	0.00620151	up
MS.gene52774	3.79246	0.00620795	up
MS.gene068070	2.40723	0.00625993	up
MS.gene021359	4.18851	0.0062815	up
MS.gene057371	2.59901	0.00628267	up
MS.gene015242	4.98615	0.00629283	up
MS.gene28967	5.10362	0.00629597	up
MS.gene22760	3.07728	0.00629611	up
MS.gene59660	2.38413	0.0063078	up
MS.gene028355	2.36043	0.00634064	up
MS.gene32722	3.9056	0.00635905	up
MS.gene013428	2.62817	0.00636093	up
MS.gene013495	2.07337	0.00641525	up
MS.gene36683	2.19959	0.00642796	up
MS.gene69944	3.90099	0.00644402	up
MS.gene94076	2.27123	0.00652504	up
MS.gene88743	4.89621	0.00655291	up
MS.gene043289	2.03333	0.00662615	up
MS.gene014618	2.88918	0.0066439	up
MS.gene00670	2.37748	0.006696	up
MS.gene009241	6.22615	0.00669926	up
MS.gene029498	2.33522	0.0067011	up
MS.gene83253	2.33033	0.00671954	up
MS.gene047135	4.87551	0.00674065	up
MS.gene02830	5.11604	0.00677162	up
MS.gene066074	5.22902	0.00677806	up
MS.gene69440	2.71212	0.00678898	up
MS.gene005396	3.16993	0.00681891	up
MS.gene067471	2.26587	0.00686857	up
MS.gene047432	2.14743	0.00690814	up
MS.gene78543	3.11212	0.0069257	up
MS.gene067167	2.34261	0.00692612	up
MS.gene93671	4.72233	0.00694961	up
MS.gene006789	5.07091	0.00700105	up
MS.gene80872	4.88497	0.00701289	up
MS.gene20962	3.40271	0.0070597	up
MS.gene95992	2.37097	0.00708108	up
MS.gene43995	3.06139	0.00708488	up
MS.gene060879	2.20028	0.00716474	up
MS.gene037280	4.06875	0.00718128	up
MS.gene44568	2.32391	0.0071963	up
MS.gene068881	2.10146	0.00723194	up
MS.gene061919	3.41026	0.00728822	up
MS.gene003099	2.23186	0.007302	up
MS.gene88950	2.82848	0.00739572	up
MS.gene070478	3.29214	0.00739572	up
MS.gene30542	2.53863	0.00743262	up
MS.gene069018	2.08581	0.00754375	up
MS.gene051334	2.15641	0.00755092	up
MS.gene43378	4.90115	0.00757879	up
MS.gene072399	2.90394	0.00762093	up
MS.gene03459	2.13254	0.00765045	up
MS.gene21776	2.00495	0.0077036	up
MS.gene057208	2.82415	0.00773876	up
MS.gene31616	4.82642	0.00775928	up
MS.gene52059	2.76129	0.00781856	up
MS.gene25554	2.22041	0.00783561	up
MS.gene61401	5.02525	0.00785156	up
MS.gene062948	2.51262	0.00788169	up
MS.gene039677	2.76711	0.00789176	up
MS.gene42823	3.41439	0.00792864	up
MS.gene58671	2.97392	0.00798647	up
MS.gene97216	3.21743	0.00804031	up
MS.gene010202	2.36698	0.00805703	up
MS.gene54805	2.16476	0.00808813	up
MS.gene022177	5.07405	0.00813441	up
MS.gene017772	2.1453	0.00814394	up
MS.gene86579	2.0076	0.00826587	up
MS.gene70298	4.93918	0.00826866	up
MS.gene35922	5.28939	0.00827859	up
MS.gene042996	5.16933	0.00835194	up
MS.gene28494	2.92857	0.0083635	up
MS.gene005375	2.31624	0.0083805	up
MS.gene00924	3.11215	0.00838304	up
MS.gene09802	5.50417	0.00840083	up
MS.gene014383	2.19495	0.00842647	up
MS.gene42751	5.21308	0.00842736	up
MS.gene041047	3.42684	0.00849442	up
MS.gene83167	2.51102	0.00854773	up
MS.gene87375	2.74955	0.0085879	up
MS.gene013721	2.67624	0.00860848	up
MS.gene007670	2.12926	0.00861949	up
MS.gene060298	2.35886	0.00862914	up
MS.gene018023	4.11887	0.00866545	up
MS.gene09583	4.37303	0.00866961	up
MS.gene014531	4.94427	0.00867865	up
MS.gene91648	3.96554	0.00869615	up
MS.gene041789	2.09679	0.00870296	up
MS.gene08427	5.06376	0.00877214	up
MS.gene02798	2.08859	0.00878319	up
MS.gene012481	2.28807	0.00880949	up
MS.gene064993	3.69764	0.00881636	up
MS.gene002892	2.45345	0.00887193	up
MS.gene030525	5.07829	0.00887279	up
MS.gene67132	4.68242	0.00889639	up
MS.gene09561	2.74262	0.00892928	up
MS.gene051813	2.51229	0.00897152	up
MS.gene40059	4.55247	0.00901579	up
MS.gene043295	5.40446	0.00901932	up
MS.gene050073	2.15018	0.00910447	up
MS.gene038119	4.32993	0.00910786	up
MS.gene067261	2.32289	0.00919149	up
MS.gene030063	4.53886	0.00919996	up
MS.gene028982	2.9148	0.00922195	up
MS.gene062981	5.2331	0.00924336	up
MS.gene004294	3.43063	0.00930007	up
MS.gene87737	3.63447	0.00932006	up
MS.gene95744	3.5353	0.00935428	up
MS.gene24104	4.04732	0.00939504	up
MS.gene01115	4.95345	0.00942804	up
MS.gene058498	2.29271	0.00942804	up
MS.gene072716	2.76211	0.00942804	up
MS.gene50152	5.96705	0.00943201	up
MS.gene76569	3.10373	0.0094731	up
MS.gene047176	3.12006	0.00948429	up
MS.gene074357	2.01701	0.00951382	up
MS.gene004934	4.05584	0.00952367	up
[truncated: 6,125 more rows]

## Sheet: G2
GeneID	log2FoldChange	Adjust Pvalue	up/down
MS.gene051399	7.88811	1.51627e-159	up
MS.gene29752	7.4511	1.20604e-146	up
MS.gene61273	9.81481	1.34135e-131	up
MS.gene029726	8.24101	4.33765e-117	up
MS.gene81679	6.90899	8.9553e-112	up
MS.gene034987	7.29752	1.48431e-89	up
MS.gene064881	6.29919	1.94828e-81	up
MS.gene89264	5.57015	3.59438e-79	up
MS.gene47414	8.638	2.58596e-78	up
MS.gene000238	5.13633	7.07438e-68	up
MS.gene003369	8.99711	2.00244e-67	up
MS.gene43994	10.3136	3.47541e-62	up
MS.gene027860	5.79159	3.79042e-62	up
MS.gene017992	3.71909	8.17772e-61	up
MS.gene011497	3.66621	1.2572e-58	up
MS.gene031826	8.87132	1.79047e-57	up
MS.gene94257	5.38094	9.38661e-56	up
MS.gene32183	4.40676	3.58342e-54	up
MS.gene010803	4.76587	5.04915e-51	up
MS.gene71906	4.55463	6.21418e-51	up
MS.gene44862	5.12848	5.93829e-50	up
MS.gene62864	4.36302	2.26232e-49	up
MS.gene056650	4.37262	9.69137e-49	up
MS.gene03784	6.80583	1.87411e-48	up
MS.gene43363	3.97139	2.35315e-48	up
MS.gene97976	4.35701	2.93282e-48	up
MS.gene09432	7.66479	9.33034e-48	up
MS.gene89265	4.86485	3.44959e-47	up
MS.gene055157	5.22894	4.21609e-47	up
MS.gene91765	2.28419	9.63838e-47	up
MS.gene46065	3.46865	2.91929e-46	up
MS.gene99339	4.52953	1.21505e-45	up
MS.gene004891	4.09946	2.69392e-45	up
MS.gene27075	3.68547	9.5136e-45	up
MS.gene030651	4.98073	2.39883e-44	up
MS.gene003815	4.68336	7.3925e-44	up
MS.gene07708	7.29054	1.00815e-43	up
MS.gene74690	2.14971	9.89369e-43	up
MS.gene01685	7.43834	4.09369e-42	up
MS.gene056483	4.92821	4.21198e-42	up
MS.gene67212	2.89735	1.58225e-40	up
MS.gene23769	5.78844	1.61694e-40	up
MS.gene21592	4.84671	1.73023e-40	up
MS.gene054209	2.48269	2.25714e-40	up
MS.gene48475	4.28862	9.9453e-40	up
MS.gene02350	6.51515	4.92039e-39	up
MS.gene47913	2.96992	6.4264e-39	up
MS.gene27195	6.06234	1.21191e-38	up
MS.gene030998	3.12533	2.75644e-38	up
MS.gene54620	3.8663	5.76281e-38	up
MS.gene059052	2.47718	7.61562e-38	up
MS.gene46063	5.11465	9.50789e-38	up
MS.gene08692	3.7353	1.13012e-37	up
MS.gene89266	3.66096	2.77612e-37	up
MS.gene46066	2.44469	3.15286e-37	up
MS.gene06749	5.70078	7.54499e-37	up
MS.gene039314	4.50079	4.32553e-36	up
MS.gene058219	5.3783	5.91167e-36	up
MS.gene055991	4.01716	6.03747e-36	up
MS.gene90607	6.13607	1.33631e-35	up
MS.gene28707	5.35657	1.6158e-35	up
MS.gene42350	2.8593	2.4164e-35	up
MS.gene46064	5.07335	5.38395e-35	up
MS.gene048444	2.57699	5.93513e-35	up
MS.gene21367	5.03748	1.93458e-34	up
MS.gene038763	2.81247	2.24736e-34	up
MS.gene007680	3.58105	5.52246e-34	up
MS.gene041428	3.29567	8.22265e-34	up
MS.gene20462	3.16085	9.08369e-34	up
MS.gene036411	5.24146	1.83228e-33	up
MS.gene016772	4.01355	2.07819e-33	up
MS.gene81272	3.60247	5.36052e-33	up
MS.gene005127	10.738	8.68176e-33	up
MS.gene040004	3.48475	9.18837e-33	up
MS.gene04628	3.24936	9.86404e-33	up
MS.gene013056	2.36443	1.46948e-32	up
MS.gene95874	2.70066	2.80729e-32	up
MS.gene97973	4.34177	4.62234e-32	up
MS.gene010631	2.76014	1.3185e-31	up
MS.gene59361	4.0089	1.79322e-31	up
MS.gene047978	4.93008	2.13124e-31	up
MS.gene066490	3.55724	2.25343e-31	up
MS.gene69945	9.70711	2.64767e-31	up
MS.gene45766	4.77352	3.37038e-31	up
MS.gene033301	2.54363	3.39439e-31	up
MS.gene004888	2.99339	5.75677e-31	up
MS.gene47489	3.64689	5.79517e-31	up
MS.gene050129	3.79601	7.24931e-31	up
MS.gene015555	2.35327	9.87261e-31	up
MS.gene02298	5.25734	1.02693e-30	up
MS.gene030222	3.22129	1.05839e-30	up
MS.gene86524	2.63754	1.73014e-30	up
MS.gene044089	5.36012	2.16846e-30	up
MS.gene036721	2.69536	5.0908e-30	up
MS.gene020844	3.31023	1.18945e-29	up
MS.gene004751	2.91291	1.21688e-29	up
MS.gene79178	2.27917	1.8677e-29	up
MS.gene046484	2.45181	1.95482e-29	up
MS.gene037805	5.50896	2.24038e-29	up
MS.gene81590	3.4147	3.01926e-29	up
MS.gene01859	2.92713	3.05008e-29	up
MS.gene002997	6.4596	3.44071e-29	up
MS.gene007572	12.1086	4.14076e-29	up
MS.gene54322	2.22648	5.41263e-29	up
MS.gene90875	3.99004	8.49626e-29	up
MS.gene02349	5.91762	2.14782e-28	up
MS.gene64907	2.53798	2.14782e-28	up
MS.gene004319	2.77634	2.39007e-28	up
MS.gene055158	3.01616	2.40392e-28	up
MS.gene017561	5.15449	3.39886e-28	up
MS.gene29570	3.52213	3.49424e-28	up
MS.gene31561	4.91257	3.92279e-28	up
MS.gene65285	5.10719	5.38874e-28	up
MS.gene07414	4.23396	8.1597e-28	up
MS.gene76222	3.42728	1.06176e-27	up
MS.gene052715	2.9136	3.12093e-27	up
MS.gene017559	6.29517	3.12093e-27	up
MS.gene84139	7.09414	3.71969e-27	up
MS.gene004158	4.88377	4.49131e-27	up
MS.gene58042	2.68195	5.55547e-27	up
MS.gene56007	5.17406	7.10317e-27	up
MS.gene061243	3.29273	8.56879e-27	up
MS.gene26542	3.06243	1.06092e-26	up
MS.gene74305	2.44658	1.14244e-26	up
MS.gene89988	6.51783	1.15685e-26	up
MS.gene01272	8.62177	1.18461e-26	up
MS.gene006771	2.26827	1.46081e-26	up
MS.gene42113	5.11019	2.29065e-26	up
MS.gene050312	3.58403	2.62326e-26	up
MS.gene95223	3.27862	2.76247e-26	up
MS.gene21522	3.62529	3.38783e-26	up
MS.gene40664	4.31406	4.49955e-26	up
MS.gene029614	3.02699	5.10673e-26	up
MS.gene000484	2.44781	5.39571e-26	up
MS.gene050095	2.70614	5.70801e-26	up
MS.gene038939	2.55708	9.59128e-26	up
MS.gene80628	3.30877	1.29666e-25	up
MS.gene66840	5.95534	1.53095e-25	up
MS.gene047977	2.48281	1.68773e-25	up
MS.gene42621	2.21744	2.8248e-25	up
MS.gene58109	4.79009	3.74195e-25	up
MS.gene21637	2.14081	3.86198e-25	up
MS.gene049377	2.74746	6.19396e-25	up
MS.gene004783	2.48499	1.02085e-24	up
MS.gene011265	3.19417	1.03056e-24	up
MS.gene023016	2.74165	1.04585e-24	up
MS.gene010252	2.62886	1.60647e-24	up
MS.gene069033	2.45184	2.13838e-24	up
MS.gene41567	4.24277	2.33181e-24	up
MS.gene030658	4.47855	2.77569e-24	up
MS.gene72673	2.57385	4.07768e-24	up
MS.gene065081	2.56341	4.19616e-24	up
MS.gene013629	6.88931	4.99697e-24	up
MS.gene011734	2.18973	5.08387e-24	up
MS.gene01623	2.77374	6.04125e-24	up
MS.gene67442	3.14678	6.14901e-24	up
MS.gene96392	4.87613	7.17594e-24	up
MS.gene24152	4.14266	7.74592e-24	up
MS.gene89521	2.47823	7.86329e-24	up
MS.gene51448	3.02703	7.97857e-24	up
MS.gene07412	2.95306	1.21588e-23	up
MS.gene52664	3.20628	1.27774e-23	up
MS.gene88914	3.15769	1.30543e-23	up
MS.gene033300	2.84702	1.31878e-23	up
MS.gene070645	4.53255	1.45068e-23	up
MS.gene039378	7.44968	1.72941e-23	up
MS.gene40058	3.12671	1.86343e-23	up
MS.gene38335	6.34537	2.4749e-23	up
MS.gene45737	4.79722	2.53014e-23	up
MS.gene69943	5.7451	2.63577e-23	up
MS.gene80979	3.6334	2.84832e-23	up
MS.gene001965	2.26011	3.11368e-23	up
MS.gene007705	2.80189	3.54326e-23	up
MS.gene39612	3.12179	3.55996e-23	up
MS.gene050380	2.45435	3.56704e-23	up
MS.gene42145	2.91289	4.13703e-23	up
MS.gene93725	12.4138	4.89314e-23	up
MS.gene73494	4.14126	6.32681e-23	up
MS.gene53959	5.50228	6.38765e-23	up
MS.gene92389	2.47728	6.60848e-23	up
MS.gene59476	2.93681	8.64644e-23	up
MS.gene44975	2.47621	8.77716e-23	up
MS.gene96117	4.33864	1.16856e-22	up
MS.gene03499	6.05978	1.22134e-22	up
MS.gene050984	2.70238	1.44675e-22	up
MS.gene047933	2.97082	1.5923e-22	up
MS.gene005264	2.90184	1.93757e-22	up
MS.gene79063	2.37514	2.39192e-22	up
MS.gene98524	6.72016	3.70348e-22	up
MS.gene60650	2.07023	3.77226e-22	up
MS.gene97301	3.42107	3.7859e-22	up
MS.gene062245	3.91701	4.46601e-22	up
MS.gene91617	2.78594	5.12052e-22	up
MS.gene93063	5.25729	6.02809e-22	up
MS.gene048488	2.79804	7.6318e-22	up
MS.gene07377	4.31865	8.09449e-22	up
MS.gene008756	4.05784	8.44873e-22	up
MS.gene60088	8.1079	8.88991e-22	up
MS.gene007372	12.1589	9.25927e-22	up
MS.gene032887	3.0565	9.48081e-22	up
MS.gene32137	2.75765	1.00963e-21	up
MS.gene93101	4.4242	1.20408e-21	up
MS.gene40667	3.70372	1.3966e-21	up
MS.gene047202	2.24513	1.44857e-21	up
MS.gene38248	3.14178	1.58241e-21	up
MS.gene70250	4.04203	3.34344e-21	up
MS.gene054809	3.29159	3.52408e-21	up
MS.gene83139	3.41454	4.09753e-21	up
MS.gene053476	3.69513	4.17154e-21	up
MS.gene08754	4.19449	4.26561e-21	up
MS.gene75142	2.03558	4.55134e-21	up
MS.gene00178	4.53812	4.63496e-21	up
MS.gene008755	3.10199	5.11143e-21	up
MS.gene069194	2.50035	5.32558e-21	up
MS.gene007190	2.78388	5.53024e-21	up
MS.gene070824	2.70544	6.62464e-21	up
MS.gene057903	2.75815	6.74101e-21	up
MS.gene41340	3.2981	1.09174e-20	up
MS.gene58600	2.18052	1.23263e-20	up
MS.gene87367	3.24296	1.30912e-20	up
MS.gene073222	2.03925	1.7427e-20	up
MS.gene80525	5.42643	2.09471e-20	up
MS.gene70676	2.22821	2.36144e-20	up
MS.gene027877	2.86796	2.53247e-20	up
MS.gene049483	4.45291	2.73526e-20	up
MS.gene30917	3.7903	3.27342e-20	up
MS.gene012399	3.16636	4.01755e-20	up
MS.gene94256	5.77694	4.05139e-20	up
MS.gene03965	3.04919	4.09151e-20	up
MS.gene32445	2.52893	4.63628e-20	up
MS.gene60696	3.35585	4.75419e-20	up
MS.gene93064	3.24275	5.54858e-20	up
MS.gene09159	2.90161	6.76693e-20	up
MS.gene008757	2.7446	7.09385e-20	up
MS.gene45868	2.71735	7.53286e-20	up
MS.gene067188	2.93133	7.54128e-20	up
MS.gene028336	4.44275	1.0926e-19	up
MS.gene008799	3.24547	1.1444e-19	up
MS.gene27134	2.30416	1.26037e-19	up
MS.gene32980	3.1397	1.31013e-19	up
MS.gene029150	3.84081	1.78396e-19	up
MS.gene06502	2.41833	2.06091e-19	up
MS.gene64431	2.30089	2.39608e-19	up
MS.gene42872	3.09505	2.43273e-19	up
MS.gene53714	3.62678	2.57217e-19	up
MS.gene028733	2.06978	2.85005e-19	up
MS.gene01436	2.28735	2.85283e-19	up
MS.gene023853	5.06889	3.05525e-19	up
MS.gene65503	2.80626	3.07587e-19	up
MS.gene71655	2.8033	3.43807e-19	up
MS.gene89267	3.17048	3.51295e-19	up
MS.gene020937	3.18766	3.98663e-19	up
MS.gene31336	2.04501	4.31609e-19	up
MS.gene68386	4.68948	4.57275e-19	up
MS.gene72362	8.21295	5.12255e-19	up
MS.gene45150	3.17412	5.19738e-19	up
MS.gene30913	4.71343	5.19747e-19	up
MS.gene63856	2.23628	5.38797e-19	up
MS.gene064181	2.41523	5.47512e-19	up
MS.gene26541	3.41699	5.72634e-19	up
MS.gene066772	3.63647	5.87413e-19	up
MS.gene009523	2.80697	7.65046e-19	up
MS.gene01113	2.54713	8.04929e-19	up
MS.gene06447	2.09101	1.02926e-18	up
MS.gene62014	3.98337	1.04912e-18	up
MS.gene042095	3.24164	1.15885e-18	up
MS.gene37102	2.30748	1.21966e-18	up
MS.gene26539	2.37234	1.22803e-18	up
MS.gene030652	4.38806	1.25122e-18	up
MS.gene059236	2.9939	1.37877e-18	up
MS.gene08732	3.50614	1.38578e-18	up
MS.gene78121	7.08208	1.46502e-18	up
MS.gene005957	2.11557	1.7555e-18	up
MS.gene008694	3.71921	1.78675e-18	up
MS.gene017252	2.52233	1.8586e-18	up
MS.gene012838	2.54396	1.92975e-18	up
MS.gene018183	2.35584	2.03414e-18	up
MS.gene037397	3.89157	2.0684e-18	up
MS.gene41428	3.76726	2.24211e-18	up
MS.gene017979	8.22719	2.24237e-18	up
MS.gene010261	4.16594	2.26644e-18	up
MS.gene036147	2.59541	2.37978e-18	up
MS.gene011339	2.58226	2.43195e-18	up
MS.gene062798	2.23739	2.75506e-18	up
MS.gene45343	2.67901	2.89438e-18	up
MS.gene010408	2.36504	3.15303e-18	up
MS.gene22374	11.2092	3.5122e-18	up
MS.gene82463	2.14648	3.76334e-18	up
MS.gene053889	3.48567	3.79599e-18	up
MS.gene82756	2.10033	3.85843e-18	up
MS.gene002638	2.62703	4.53047e-18	up
MS.gene05113	2.35355	4.60947e-18	up
MS.gene60369	2.39761	5.27475e-18	up
MS.gene94255	3.56961	5.3726e-18	up
MS.gene27194	6.7498	5.59665e-18	up
MS.gene008006	3.43777	6.16704e-18	up
MS.gene90584	2.83339	7.18543e-18	up
MS.gene41276	4.28786	8.20258e-18	up
MS.gene072377	2.86259	8.35909e-18	up
MS.gene00536	4.10429	8.37449e-18	up
MS.gene76845	2.48769	8.37449e-18	up
MS.gene021902	2.61195	8.84876e-18	up
MS.gene34909	2.49732	1.02253e-17	up
MS.gene55028	4.24918	1.04817e-17	up
MS.gene042632	3.03806	1.06703e-17	up
MS.gene049374	2.04875	1.13529e-17	up
MS.gene32444	2.54231	1.35045e-17	up
MS.gene68072	3.1245	1.43848e-17	up
MS.gene027509	2.53752	1.47957e-17	up
MS.gene53126	3.49207	1.72356e-17	up
MS.gene31710	2.2354	1.84565e-17	up
MS.gene02252	10.9623	1.85884e-17	up
MS.gene48989	2.74899	1.89475e-17	up
MS.gene070221	4.2864	2.09433e-17	up
MS.gene48426	2.82804	2.30658e-17	up
MS.gene008800	2.7229	2.38258e-17	up
MS.gene64816	2.05959	2.81314e-17	up
MS.gene67328	2.50468	2.83067e-17	up
MS.gene033184	2.37798	2.92246e-17	up
MS.gene73320	4.51132	3.75943e-17	up
MS.gene88660	2.18994	3.78193e-17	up
MS.gene008947	4.12699	3.86432e-17	up
MS.gene28722	2.16505	4.64596e-17	up
MS.gene002998	5.29444	4.7445e-17	up
MS.gene83410	2.25664	4.77742e-17	up
MS.gene014263	3.15762	5.06043e-17	up
MS.gene95648	2.76492	5.421e-17	up
MS.gene07711	5.9942	5.91387e-17	up
MS.gene063016	2.53787	5.99486e-17	up
MS.gene07850	3.14745	6.66027e-17	up
MS.gene028844	3.88942	7.13111e-17	up
MS.gene054616	3.9744	7.19882e-17	up
MS.gene45352	2.78422	7.49842e-17	up
MS.gene023607	2.74933	8.3412e-17	up
MS.gene69282	2.40674	9.65003e-17	up
MS.gene027518	2.11903	1.28613e-16	up
MS.gene042403	2.0967	1.35504e-16	up
MS.gene07479	7.69293	1.61088e-16	up
MS.gene012411	2.50216	1.74607e-16	up
MS.gene052313	10.5202	1.79761e-16	up
MS.gene92882	3.10388	1.81369e-16	up
MS.gene58592	2.34354	2.0031e-16	up
MS.gene029855	3.35324	2.10132e-16	up
MS.gene28453	2.47001	2.14455e-16	up
MS.gene33130	2.20224	2.32377e-16	up
MS.gene37141	2.23392	2.35933e-16	up
MS.gene040055	2.18339	2.70835e-16	up
MS.gene056494	2.21417	2.84694e-16	up
MS.gene046041	2.81204	3.10727e-16	up
MS.gene039794	5.04905	3.52406e-16	up
MS.gene54724	2.06532	3.53925e-16	up
MS.gene024363	2.81733	3.72829e-16	up
MS.gene00252	2.33048	4.29059e-16	up
MS.gene064906	4.09764	4.38753e-16	up
MS.gene44627	2.62513	4.68961e-16	up
MS.gene64450	4.1891	5.09152e-16	up
MS.gene56445	2.98063	5.27224e-16	up
MS.gene005602	2.85253	6.09399e-16	up
MS.gene008758	2.9159	6.58478e-16	up
MS.gene54139	5.57041	6.69702e-16	up
MS.gene55458	4.70097	6.86897e-16	up
MS.gene056068	2.84166	7.54747e-16	up
MS.gene64912	3.14868	8.25634e-16	up
MS.gene86520	2.93915	1.01889e-15	up
MS.gene09712	3.61905	1.01993e-15	up
MS.gene23884	3.77645	1.1333e-15	up
MS.gene60462	2.45405	1.18837e-15	up
MS.gene041920	3.48582	1.22465e-15	up
MS.gene063415	2.68605	1.24529e-15	up
MS.gene010701	3.11342	1.26686e-15	up
MS.gene07410	2.4775	1.30518e-15	up
MS.gene93239	10.62	1.72028e-15	up
MS.gene62405	2.86369	1.79322e-15	up
MS.gene24547	4.17591	2.29362e-15	up
MS.gene74773	3.44292	2.46404e-15	up
MS.gene026033	3.31112	2.4812e-15	up
MS.gene032517	2.82818	2.60897e-15	up
MS.gene62995	2.93796	2.881e-15	up
MS.gene064058	2.67929	3.41298e-15	up
MS.gene26540	2.28977	3.49613e-15	up
MS.gene65344	2.12813	4.22015e-15	up
MS.gene026315	2.99395	4.62379e-15	up
MS.gene36174	3.95807	4.83475e-15	up
MS.gene06130	2.41751	5.14123e-15	up
MS.gene026597	2.14828	5.23856e-15	up
MS.gene44571	4.87425	5.43316e-15	up
MS.gene39613	3.61842	5.5556e-15	up
MS.gene041145	2.05117	5.69541e-15	up
MS.gene41639	2.03754	5.70778e-15	up
MS.gene92210	3.98786	6.1445e-15	up
MS.gene60461	3.80212	6.32126e-15	up
MS.gene006950	2.21662	6.36991e-15	up
MS.gene031314	4.07922	6.41899e-15	up
MS.gene01482	2.65451	6.42825e-15	up
MS.gene44712	2.03481	6.61465e-15	up
MS.gene007942	2.15434	6.89884e-15	up
MS.gene42822	2.429	7.37011e-15	up
MS.gene30763	4.71907	8.21222e-15	up
MS.gene07326	3.17049	8.35287e-15	up
MS.gene91651	3.62494	9.74265e-15	up
MS.gene063668	2.02258	9.86611e-15	up
MS.gene66017	3.63073	1.03248e-14	up
MS.gene004886	2.46429	1.21718e-14	up
MS.gene027740	2.23589	1.22989e-14	up
MS.gene08201	2.44135	1.35223e-14	up
MS.gene26152	2.15971	1.5298e-14	up
MS.gene055812	2.11849	1.72001e-14	up
MS.gene056647	3.86195	1.73823e-14	up
MS.gene52221	4.80314	2.07585e-14	up
MS.gene99506	2.34256	2.13441e-14	up
MS.gene023326	2.2254	2.4517e-14	up
MS.gene75985	2.96362	2.51749e-14	up
MS.gene030684	2.21213	2.63896e-14	up
MS.gene65010	2.00801	2.7602e-14	up
MS.gene039764	2.12603	3.16221e-14	up
MS.gene021756	2.96126	3.35125e-14	up
MS.gene56554	2.02582	3.49309e-14	up
MS.gene97002	3.28111	3.51187e-14	up
MS.gene39867	4.36987	3.83592e-14	up
MS.gene27591	3.51895	4.0456e-14	up
MS.gene059890	2.52871	4.5627e-14	up
MS.gene04593	2.18604	4.73627e-14	up
MS.gene049270	2.01449	4.90208e-14	up
MS.gene77719	10.0167	5.17169e-14	up
MS.gene89101	2.3235	5.32939e-14	up
MS.gene043270	2.02857	5.62753e-14	up
MS.gene35123	5.09925	5.94578e-14	up
MS.gene89525	3.48777	6.03109e-14	up
MS.gene017946	2.70502	6.48072e-14	up
MS.gene81524	2.87178	6.65086e-14	up
MS.gene45142	2.42978	7.12898e-14	up
MS.gene23825	3.43937	7.12898e-14	up
MS.gene57812	2.62243	8.25907e-14	up
MS.gene037523	2.47627	8.45428e-14	up
MS.gene039341	2.43539	8.48112e-14	up
MS.gene08666	2.44781	8.89716e-14	up
MS.gene62634	2.72337	9.3409e-14	up
MS.gene72930	2.11106	9.56754e-14	up
MS.gene21484	2.06737	1.07024e-13	up
MS.gene82180	2.1692	1.12258e-13	up
MS.gene047110	2.31331	1.32668e-13	up
MS.gene28528	2.92082	1.37224e-13	up
MS.gene025886	4.63651	1.43664e-13	up
MS.gene057472	3.13959	1.44731e-13	up
MS.gene01199	3.46354	1.51949e-13	up
MS.gene073518	2.20893	1.53576e-13	up
MS.gene22638	2.3208	1.5591e-13	up
MS.gene031823	9.8035	1.58182e-13	up
MS.gene26240	2.13451	1.69212e-13	up
MS.gene33129	3.18198	1.70935e-13	up
MS.gene07486	2.85532	1.92945e-13	up
MS.gene033629	4.8978	2.32609e-13	up
MS.gene35757	4.26243	2.60278e-13	up
MS.gene82323	2.3208	2.89598e-13	up
MS.gene85481	2.05308	3.06432e-13	up
MS.gene72003	8.22602	3.15905e-13	up
MS.gene99049	2.5828	3.39488e-13	up
MS.gene21608	2.285	3.45491e-13	up
MS.gene072398	8.2076	3.45584e-13	up
MS.gene82520	2.98011	3.79098e-13	up
MS.gene013353	3.70325	3.81638e-13	up
MS.gene02084	3.80711	4.09837e-13	up
MS.gene58108	4.05897	4.86966e-13	up
MS.gene01080	2.29414	4.93961e-13	up
MS.gene38003	2.66114	5.02183e-13	up
MS.gene011168	4.3946	7.08115e-13	up
MS.gene027053	2.19317	7.12213e-13	up
MS.gene79911	2.75848	7.19571e-13	up
MS.gene032761	2.89944	7.90005e-13	up
MS.gene60339	2.15122	8.01819e-13	up
MS.gene037194	2.25943	8.1792e-13	up
MS.gene94906	2.26526	8.34312e-13	up
MS.gene028463	3.25589	8.55008e-13	up
MS.gene049951	2.51882	8.58619e-13	up
MS.gene007720	2.71173	8.7515e-13	up
MS.gene020365	2.96681	8.7739e-13	up
MS.gene069420	2.40475	9.20603e-13	up
MS.gene031922	2.94307	9.50765e-13	up
MS.gene58303	2.17417	1.0085e-12	up
MS.gene028705	2.14649	1.09507e-12	up
MS.gene01322	2.1784	1.18454e-12	up
MS.gene006877	2.78032	1.22908e-12	up
MS.gene006481	5.98852	1.28352e-12	up
MS.gene026614	2.70986	1.32988e-12	up
MS.gene065699	4.55469	1.36675e-12	up
MS.gene056482	3.27304	1.41789e-12	up
MS.gene017086	2.30406	1.45868e-12	up
MS.gene037710	3.01518	1.47522e-12	up
MS.gene74035	2.54556	1.50228e-12	up
MS.gene54511	2.68353	1.64355e-12	up
MS.gene53020	2.01144	1.77649e-12	up
MS.gene07041	2.35159	1.77649e-12	up
MS.gene017054	2.16371	1.81884e-12	up
MS.gene46828	2.00513	1.84554e-12	up
MS.gene82410	2.8717	1.90662e-12	up
MS.gene24578	3.6311	1.96545e-12	up
MS.gene36423	4.75308	1.97597e-12	up
MS.gene002294	7.56854	2.00718e-12	up
MS.gene045340	3.75317	2.21639e-12	up
MS.gene26544	3.08501	2.29447e-12	up
MS.gene64778	2.77511	2.326e-12	up
MS.gene030574	4.50342	2.35848e-12	up
MS.gene47488	2.42278	2.43699e-12	up
MS.gene019321	2.33483	2.68597e-12	up
MS.gene22445	3.34124	2.77902e-12	up
MS.gene70149	2.07968	2.81966e-12	up
MS.gene47490	3.01521	2.8839e-12	up
MS.gene72022	2.04912	2.88972e-12	up
MS.gene025671	2.09597	2.95601e-12	up
MS.gene73821	2.10001	3.08145e-12	up
MS.gene28823	7.96222	3.35733e-12	up
MS.gene072805	2.10473	3.76167e-12	up
MS.gene23771	5.80187	3.78968e-12	up
MS.gene043334	4.92844	3.84978e-12	up
MS.gene46791	2.25847	3.9032e-12	up
MS.gene83138	3.0219	4.01935e-12	up
MS.gene59817	3.69526	4.07477e-12	up
MS.gene49083	3.17112	4.43415e-12	up
MS.gene062937	2.43182	4.51532e-12	up
MS.gene035696	2.10944	4.66494e-12	up
MS.gene064674	3.95643	4.69855e-12	up
MS.gene048564	3.23019	4.71654e-12	up
MS.gene73684	2.5452	4.89848e-12	up
MS.gene002905	4.7053	4.90318e-12	up
MS.gene70281	2.24706	4.90426e-12	up
MS.gene67242	2.16065	4.9482e-12	up
MS.gene031821	6.79633	4.95086e-12	up
MS.gene78685	2.15442	5.30745e-12	up
MS.gene038271	2.63919	6.24051e-12	up
MS.gene070316	2.01206	7.02794e-12	up
MS.gene86782	4.89127	7.19173e-12	up
MS.gene08986	2.93975	7.47575e-12	up
MS.gene86824	2.16285	7.7746e-12	up
MS.gene26654	2.85129	7.7746e-12	up
MS.gene062797	2.22651	7.84175e-12	up
MS.gene89257	2.1349	8.05635e-12	up
MS.gene014530	3.07148	8.07101e-12	up
MS.gene97394	2.28835	8.53435e-12	up
MS.gene31036	2.23417	8.90329e-12	up
MS.gene039954	3.18305	9.49324e-12	up
MS.gene066584	2.66771	9.64881e-12	up
MS.gene44473	2.92247	9.91278e-12	up
MS.gene92844	2.16254	1.00318e-11	up
MS.gene041141	2.33713	1.0275e-11	up
MS.gene34486	3.31779	1.08442e-11	up
MS.gene85532	3.30051	1.11114e-11	up
MS.gene007654	2.00591	1.14092e-11	up
MS.gene047011	3.37407	1.39764e-11	up
MS.gene37897	3.26773	1.42527e-11	up
MS.gene50588	2.63665	1.49729e-11	up
MS.gene75656	3.51094	1.57717e-11	up
MS.gene003440	2.32337	1.58957e-11	up
MS.gene004177	4.01632	1.63314e-11	up
MS.gene066013	2.18385	1.68078e-11	up
MS.gene49445	2.3689	1.77437e-11	up
MS.gene46686	4.99646	1.91097e-11	up
MS.gene035578	2.05689	1.96658e-11	up
MS.gene030660	3.88387	1.99914e-11	up
MS.gene84136	4.00213	2.00802e-11	up
MS.gene75654	2.73938	2.2977e-11	up
MS.gene81587	3.11891	2.42846e-11	up
MS.gene58104	3.93043	2.47204e-11	up
MS.gene31058	2.46223	2.70936e-11	up
MS.gene99927	2.15789	2.84882e-11	up
MS.gene068618	3.31733	2.88612e-11	up
MS.gene90539	2.14148	2.9637e-11	up
MS.gene021393	2.08805	2.96772e-11	up
MS.gene011896	2.45682	3.03018e-11	up
MS.gene069486	2.47258	3.05091e-11	up
MS.gene045334	3.04317	3.16459e-11	up
MS.gene38012	3.28722	3.41856e-11	up
MS.gene069970	6.61074	3.57245e-11	up
MS.gene66308	3.08397	3.5726e-11	up
MS.gene037580	7.59968	3.64265e-11	up
MS.gene74685	2.49953	3.66787e-11	up
MS.gene00868	2.80077	4.30863e-11	up
MS.gene057369	2.44227	4.32001e-11	up
MS.gene32226	2.35487	4.35797e-11	up
MS.gene85584	2.93162	4.72152e-11	up
MS.gene77397	2.59292	4.72939e-11	up
MS.gene015600	2.64609	4.75788e-11	up
MS.gene87066	3.23782	4.8378e-11	up
MS.gene035929	2.44889	4.95116e-11	up
MS.gene95759	3.12524	5.34964e-11	up
MS.gene054754	2.68718	5.90958e-11	up
MS.gene036290	4.0638	6.06763e-11	up
MS.gene76995	2.71841	6.2603e-11	up
MS.gene001071	2.6295	6.31101e-11	up
MS.gene00782	6.88701	6.64858e-11	up
MS.gene43174	3.10106	6.77366e-11	up
MS.gene047924	2.35301	7.49772e-11	up
MS.gene047365	2.26055	7.56679e-11	up
MS.gene79351	2.24518	8.02495e-11	up
MS.gene00168	3.15946	8.03759e-11	up
MS.gene030120	2.92912	8.40397e-11	up
MS.gene46368	3.27414	8.64962e-11	up
MS.gene30298	2.16151	9.41308e-11	up
MS.gene89097	2.15246	9.54431e-11	up
MS.gene22554	2.04127	9.78397e-11	up
MS.gene070871	3.48888	9.96247e-11	up
MS.gene91309	2.17247	1.03106e-10	up
MS.gene69944	9.0993	1.05667e-10	up
MS.gene80757	2.33766	1.07496e-10	up
MS.gene06503	2.37641	1.10819e-10	up
MS.gene68086	3.03124	1.11053e-10	up
MS.gene85587	4.11023	1.19455e-10	up
MS.gene048426	2.24883	1.19509e-10	up
MS.gene77546	3.97646	1.30655e-10	up
MS.gene044995	2.57512	1.32353e-10	up
MS.gene88345	3.0439	1.41358e-10	up
MS.gene022105	2.81212	1.49728e-10	up
MS.gene062430	4.46053	1.52469e-10	up
MS.gene037560	3.77132	1.6204e-10	up
MS.gene73405	2.76968	1.65351e-10	up
MS.gene005496	2.66511	1.88391e-10	up
MS.gene043899	2.25809	1.89263e-10	up
MS.gene55182	2.80326	1.94201e-10	up
MS.gene070982	3.62897	1.94403e-10	up
MS.gene071265	2.72693	1.99259e-10	up
MS.gene79912	2.39056	2.0925e-10	up
MS.gene016778	3.43747	2.10685e-10	up
MS.gene83781	2.09724	2.14985e-10	up
MS.gene00459	2.2528	2.16755e-10	up
MS.gene68550	2.37085	2.3156e-10	up
MS.gene010361	2.48282	2.31914e-10	up
MS.gene063957	3.99181	2.33506e-10	up
MS.gene073770	2.55195	2.45703e-10	up
MS.gene059998	2.13065	2.54871e-10	up
MS.gene77231	2.63854	2.74604e-10	up
MS.gene041172	2.86144	2.92369e-10	up
MS.gene012402	2.77076	3.0351e-10	up
MS.gene36685	3.26016	3.05535e-10	up
MS.gene004099	3.59187	3.10504e-10	up
MS.gene67999	3.37275	3.19276e-10	up
MS.gene010420	2.71428	3.31273e-10	up
MS.gene99828	2.18764	3.31791e-10	up
MS.gene96808	2.11928	3.43449e-10	up
MS.gene67329	2.06679	3.5278e-10	up
MS.gene39405	4.00884	3.57989e-10	up
MS.gene30326	2.11312	3.5922e-10	up
MS.gene004947	6.16588	3.62658e-10	up
MS.gene068423	4.07957	3.73021e-10	up
MS.gene39615	2.45425	3.88467e-10	up
MS.gene074537	3.0545	3.93306e-10	up
MS.gene38684	2.89831	3.97443e-10	up
MS.gene008563	3.99361	4.05541e-10	up
MS.gene071035	2.1538	4.13662e-10	up
MS.gene07853	2.06099	4.20631e-10	up
MS.gene012146	2.81129	4.34748e-10	up
MS.gene74743	2.23292	4.39155e-10	up
MS.gene48480	3.55152	4.51549e-10	up
MS.gene052989	8.33892	4.57265e-10	up
MS.gene99565	3.61359	4.64614e-10	up
MS.gene030549	2.16418	5.01439e-10	up
MS.gene011582	8.18644	5.54406e-10	up
MS.gene81069	2.30403	5.55939e-10	up
MS.gene011628	2.97396	5.74496e-10	up
MS.gene51429	2.27763	6.05613e-10	up
MS.gene014297	5.28519	6.35873e-10	up
MS.gene74558	2.21601	6.72775e-10	up
MS.gene014392	3.25818	6.82172e-10	up
MS.gene85582	3.00542	7.64223e-10	up
MS.gene050534	3.08265	7.68866e-10	up
MS.gene58111	4.28326	7.90282e-10	up
MS.gene024644	2.34484	7.94954e-10	up
MS.gene008107	2.77437	8.29956e-10	up
MS.gene47486	2.3436	8.32214e-10	up
MS.gene07063	2.6179	8.46831e-10	up
MS.gene055400	2.19667	8.50202e-10	up
MS.gene49337	2.28178	8.75018e-10	up
MS.gene039477	2.83309	8.82344e-10	up
MS.gene052166	2.75558	9.24838e-10	up
MS.gene88364	2.37128	9.50166e-10	up
MS.gene99928	4.86018	9.70634e-10	up
MS.gene059944	2.54438	9.88221e-10	up
MS.gene00781	8.58006	9.93189e-10	up
MS.gene039231	2.2321	9.95739e-10	up
MS.gene60418	2.20262	1.07584e-09	up
MS.gene019900	2.70333	1.10001e-09	up
MS.gene015374	3.36536	1.17233e-09	up
MS.gene98223	3.16677	1.19168e-09	up
MS.gene71788	2.75437	1.22972e-09	up
MS.gene06748	3.63273	1.29885e-09	up
MS.gene067013	2.3275	1.33944e-09	up
MS.gene81583	2.63703	1.34275e-09	up
MS.gene000336	2.49718	1.34625e-09	up
MS.gene67661	2.39189	1.35672e-09	up
MS.gene91606	3.80487	1.41466e-09	up
MS.gene00231	2.19737	1.4147e-09	up
MS.gene049604	2.19066	1.41521e-09	up
MS.gene60602	2.70526	1.44371e-09	up
MS.gene62568	2.01631	1.62812e-09	up
MS.gene40838	2.25996	1.64563e-09	up
MS.gene00251	2.35254	1.69549e-09	up
MS.gene72186	3.2401	1.73332e-09	up
MS.gene44180	2.82455	1.76057e-09	up
MS.gene76900	3.61643	1.7673e-09	up
MS.gene036336	2.77603	1.82356e-09	up
MS.gene28620	2.03446	1.91416e-09	up
MS.gene059526	2.01244	1.94152e-09	up
MS.gene99889	2.41324	2.06507e-09	up
MS.gene036025	2.92168	2.15863e-09	up
MS.gene28706	8.24375	2.22078e-09	up
MS.gene018418	6.33442	2.24672e-09	up
MS.gene28678	2.44277	2.27066e-09	up
MS.gene96066	2.88793	2.27943e-09	up
MS.gene006149	3.38896	2.32108e-09	up
MS.gene81522	2.24195	2.33908e-09	up
MS.gene015326	2.03956	2.38299e-09	up
MS.gene72070	2.291	2.42347e-09	up
MS.gene037807	5.7336	2.45378e-09	up
MS.gene73643	2.17588	2.46348e-09	up
MS.gene28424	5.11207	2.48365e-09	up
MS.gene76558	8.21329	2.52699e-09	up
MS.gene044738	3.4492	2.57143e-09	up
MS.gene31255	4.02494	2.62904e-09	up
MS.gene88938	2.25328	2.65551e-09	up
MS.gene035709	3.03005	2.65551e-09	up
MS.gene79036	8.48859	2.94763e-09	up
MS.gene005150	2.32376	3.02348e-09	up
MS.gene026111	2.29802	3.49171e-09	up
MS.gene035612	2.9174	3.54599e-09	up
MS.gene05725	2.22207	3.58487e-09	up
MS.gene61206	2.17387	3.72428e-09	up
MS.gene63789	3.54046	3.83546e-09	up
MS.gene035707	2.29139	3.88499e-09	up
MS.gene52056	3.0939	3.88921e-09	up
MS.gene30317	2.15526	3.92565e-09	up
MS.gene051275	2.22939	3.9758e-09	up
MS.gene28816	2.35781	4.02572e-09	up
MS.gene24510	2.30891	4.15268e-09	up
MS.gene35923	3.60405	4.1841e-09	up
MS.gene46296	3.86991	4.22836e-09	up
MS.gene065050	3.50755	4.26922e-09	up
MS.gene061807	4.78641	4.41e-09	up
MS.gene75804	2.95599	4.47915e-09	up
MS.gene42049	4.84602	4.79493e-09	up
MS.gene07507	2.69281	4.83181e-09	up
MS.gene069208	3.12801	4.96172e-09	up
MS.gene31525	3.27769	5.07621e-09	up
MS.gene06188	3.07844	5.4904e-09	up
MS.gene76044	2.25974	5.61512e-09	up
MS.gene95677	2.26809	5.77965e-09	up
MS.gene06500	2.4948	5.79277e-09	up
MS.gene067901	3.23925	5.91067e-09	up
MS.gene051624	3.49411	5.984e-09	up
MS.gene063635	2.402	6.45618e-09	up
MS.gene42346	2.06575	6.46303e-09	up
MS.gene24805	2.92233	6.59319e-09	up
MS.gene09670	2.62308	6.65446e-09	up
MS.gene77577	3.74469	6.92114e-09	up
MS.gene94254	2.37645	6.94202e-09	up
MS.gene062789	3.86171	7.28417e-09	up
MS.gene44626	2.86525	7.32543e-09	up
MS.gene006239	3.21196	7.74858e-09	up
MS.gene28431	3.74569	7.86852e-09	up
MS.gene021200	2.41101	7.87277e-09	up
MS.gene65651	2.4691	7.98805e-09	up
MS.gene38439	6.93897	8.14016e-09	up
MS.gene48909	2.12462	8.14016e-09	up
MS.gene61109	2.13512	8.26915e-09	up
MS.gene042138	2.45394	8.41799e-09	up
MS.gene22632	3.16247	8.73241e-09	up
MS.gene004813	2.71341	8.77486e-09	up
MS.gene073934	5.00422	8.8535e-09	up
MS.gene030920	2.29959	9.19204e-09	up
MS.gene62913	2.07799	9.28788e-09	up
MS.gene003632	3.53663	9.31501e-09	up
MS.gene056101	2.82357	9.59239e-09	up
MS.gene054905	2.31382	9.71866e-09	up
MS.gene069000	2.35867	9.72226e-09	up
MS.gene052316	8.13845	9.75991e-09	up
MS.gene52814	4.41592	9.76823e-09	up
MS.gene28258	2.80452	9.80682e-09	up
MS.gene051232	2.43812	9.98962e-09	up
MS.gene021869	3.80979	1.01225e-08	up
MS.gene40012	2.58736	1.01407e-08	up
MS.gene70056	2.58394	1.03336e-08	up
MS.gene79908	3.55489	1.08104e-08	up
MS.gene052855	2.35683	1.10484e-08	up
MS.gene31716	7.98926	1.11314e-08	up
MS.gene98698	3.29888	1.13265e-08	up
MS.gene016794	3.65696	1.15634e-08	up
MS.gene77555	2.50635	1.1857e-08	up
MS.gene29810	2.03324	1.20628e-08	up
MS.gene36293	2.39362	1.24475e-08	up
MS.gene42333	2.56599	1.35737e-08	up
MS.gene011344	2.54421	1.35856e-08	up
MS.gene036353	3.08886	1.39507e-08	up
MS.gene013956	2.97122	1.46776e-08	up
MS.gene89108	2.16406	1.47474e-08	up
MS.gene84343	2.51267	1.49615e-08	up
MS.gene94198	3.48074	1.49773e-08	up
MS.gene062487	2.91576	1.52218e-08	up
MS.gene028690	2.33536	1.63992e-08	up
MS.gene99719	2.56899	1.64226e-08	up
MS.gene97155	2.66094	1.67708e-08	up
MS.gene60292	8.33285	1.71139e-08	up
MS.gene58105	4.61904	1.73111e-08	up
MS.gene069181	4.18058	1.80364e-08	up
MS.gene58133	2.03321	1.8079e-08	up
MS.gene40798	3.14687	1.81715e-08	up
MS.gene002893	2.2195	1.87196e-08	up
MS.gene63905	2.35775	1.87781e-08	up
MS.gene76353	2.41507	1.9119e-08	up
MS.gene78559	2.16046	1.94827e-08	up
MS.gene90448	2.78393	1.97749e-08	up
MS.gene90487	2.20731	2.04434e-08	up
MS.gene002688	3.24477	2.05295e-08	up
MS.gene023854	4.17531	2.05295e-08	up
MS.gene012202	3.11464	2.10028e-08	up
MS.gene94210	2.64818	2.23521e-08	up
MS.gene28428	3.57218	2.27229e-08	up
MS.gene034697	2.2663	2.27393e-08	up
MS.gene92732	4.38543	2.28686e-08	up
MS.gene49336	2.02577	2.30131e-08	up
MS.gene39528	2.08859	2.30682e-08	up
MS.gene073220	5.66758	2.33038e-08	up
MS.gene012450	2.67605	2.3345e-08	up
MS.gene53348	2.34799	2.57545e-08	up
MS.gene89711	2.42283	2.6838e-08	up
MS.gene24747	2.65517	2.68923e-08	up
MS.gene68231	3.46163	2.76839e-08	up
MS.gene027801	3.16167	2.81038e-08	up
MS.gene26832	2.7937	2.81148e-08	up
MS.gene67188	2.03918	2.94802e-08	up
MS.gene57175	2.33177	2.9837e-08	up
MS.gene011756	4.66313	3.08888e-08	up
MS.gene039076	8.10363	3.12748e-08	up
MS.gene58724	2.45704	3.18279e-08	up
MS.gene010037	3.38793	3.22162e-08	up
MS.gene011165	5.31308	3.22178e-08	up
MS.gene90056	3.28008	3.22853e-08	up
MS.gene062431	2.60242	3.27963e-08	up
MS.gene064787	4.06298	3.28191e-08	up
MS.gene03712	4.04636	3.39224e-08	up
MS.gene052588	4.50353	3.58829e-08	up
MS.gene42518	2.2586	3.58934e-08	up
MS.gene004059	8.01625	3.61413e-08	up
MS.gene67224	2.8201	3.66317e-08	up
MS.gene54803	2.06402	3.76748e-08	up
MS.gene57075	2.5517	3.79131e-08	up
MS.gene72332	2.2048	3.95609e-08	up
MS.gene54100	2.64593	4.07937e-08	up
MS.gene017902	2.7063	4.14105e-08	up
MS.gene068413	4.59136	4.1442e-08	up
MS.gene057097	4.23463	4.2688e-08	up
MS.gene031370	2.53031	4.27866e-08	up
MS.gene96519	2.27316	4.50944e-08	up
MS.gene73349	2.51633	4.56436e-08	up
MS.gene050522	2.80035	4.57456e-08	up
MS.gene34152	2.48338	4.60338e-08	up
MS.gene09260	2.80274	4.78048e-08	up
MS.gene004968	2.39178	4.88258e-08	up
MS.gene70255	7.5843	5.00756e-08	up
MS.gene33191	7.71213	5.14778e-08	up
MS.gene073451	2.16506	5.22224e-08	up
MS.gene006674	2.01409	5.27391e-08	up
MS.gene00249	2.34658	5.40866e-08	up
MS.gene58518	3.34555	5.43368e-08	up
MS.gene028367	3.68287	5.47231e-08	up
MS.gene012849	4.10519	5.61487e-08	up
MS.gene058023	2.67822	5.83951e-08	up
MS.gene065582	2.49318	5.87272e-08	up
MS.gene89750	2.48959	5.99947e-08	up
MS.gene49612	2.65246	6.01191e-08	up
MS.gene022469	2.10713	6.11989e-08	up
MS.gene051480	4.71682	6.3898e-08	up
MS.gene004524	4.20068	6.74761e-08	up
MS.gene45666	2.02243	6.9138e-08	up
MS.gene61659	3.24636	7.70405e-08	up
MS.gene65763	2.81668	7.77093e-08	up
MS.gene007981	5.10719	7.82011e-08	up
MS.gene47470	2.36489	7.85487e-08	up
MS.gene72034	3.54244	8.25733e-08	up
MS.gene063995	2.20561	8.76657e-08	up
MS.gene65102	2.6441	8.84965e-08	up
MS.gene57365	3.55262	8.91453e-08	up
MS.gene039516	2.11888	9.00489e-08	up
MS.gene051660	2.10826	9.3111e-08	up
MS.gene052534	2.8013	9.32289e-08	up
MS.gene046028	5.78814	9.51958e-08	up
MS.gene069151	2.84309	9.55405e-08	up
MS.gene74443	5.42165	9.58023e-08	up
MS.gene057371	3.70962	9.71598e-08	up
MS.gene06329	2.8535	9.79594e-08	up
MS.gene95845	4.44446	9.80417e-08	up
MS.gene28954	2.04511	1.01002e-07	up
MS.gene012677	2.35469	1.03562e-07	up
MS.gene024565	2.81375	1.04754e-07	up
MS.gene055908	2.84593	1.05037e-07	up
MS.gene74706	2.64569	1.05234e-07	up
MS.gene048396	4.48062	1.06589e-07	up
MS.gene065226	2.86794	1.07876e-07	up
MS.gene38665	6.7143	1.10303e-07	up
MS.gene55919	3.26655	1.11242e-07	up
MS.gene29180	2.11731	1.18277e-07	up
MS.gene016067	3.02553	1.24077e-07	up
MS.gene008960	3.20866	1.30546e-07	up
MS.gene027859	3.65832	1.33092e-07	up
MS.gene003363	5.02648	1.36024e-07	up
MS.gene66067	2.88941	1.44568e-07	up
MS.gene39404	2.76089	1.45099e-07	up
MS.gene91750	2.46446	1.49777e-07	up
MS.gene062158	2.35999	1.53608e-07	up
MS.gene44512	3.09855	1.61435e-07	up
MS.gene21413	3.28275	1.63831e-07	up
MS.gene60007	2.02176	1.68067e-07	up
MS.gene23514	2.22301	1.70745e-07	up
MS.gene53866	2.10465	1.7077e-07	up
MS.gene37886	2.92102	1.73132e-07	up
MS.gene54459	2.34696	1.7793e-07	up
MS.gene46114	2.1304	1.78387e-07	up
MS.gene007135	2.69214	1.81596e-07	up
MS.gene026881	3.01705	1.83012e-07	up
MS.gene66665	2.88746	1.83012e-07	up
MS.gene33531	4.17561	1.83194e-07	up
MS.gene021500	4.34856	1.84848e-07	up
MS.gene030281	2.68636	1.89632e-07	up
MS.gene50710	3.27128	1.92721e-07	up
MS.gene46499	2.30643	2.0875e-07	up
MS.gene008981	2.15866	2.17303e-07	up
MS.gene36549	3.43517	2.20447e-07	up
MS.gene037965	6.71707	2.27918e-07	up
MS.gene028763	2.63229	2.31298e-07	up
MS.gene054425	2.2855	2.34026e-07	up
MS.gene77556	3.07337	2.39036e-07	up
MS.gene042366	2.17361	2.52802e-07	up
MS.gene036289	3.95672	2.54045e-07	up
MS.gene85852	2.01545	2.54977e-07	up
MS.gene054421	2.78579	2.56722e-07	up
MS.gene013405	2.73274	2.58095e-07	up
MS.gene016066	2.58005	2.6093e-07	up
MS.gene23264	2.03832	2.6825e-07	up
MS.gene31378	2.50401	2.69947e-07	up
MS.gene032247	2.53951	2.72631e-07	up
MS.gene022576	2.34117	2.76165e-07	up
MS.gene65919	3.76408	2.77123e-07	up
MS.gene062192	7.92757	2.78913e-07	up
MS.gene82958	2.54611	2.8233e-07	up
MS.gene020422	2.18757	2.9029e-07	up
MS.gene42177	4.09683	2.94488e-07	up
MS.gene039023	2.56388	2.95932e-07	up
MS.gene049214	3.48156	2.98403e-07	up
MS.gene029386	3.02581	3.14476e-07	up
MS.gene066326	3.13523	3.15165e-07	up
MS.gene011273	4.4566	3.15678e-07	up
MS.gene056164	2.39823	3.21631e-07	up
MS.gene041383	2.37983	3.2614e-07	up
MS.gene045335	2.43222	3.27274e-07	up
MS.gene061812	4.31634	3.29678e-07	up
MS.gene48315	2.55124	3.32522e-07	up
MS.gene059112	3.79198	3.35032e-07	up
MS.gene65997	2.70911	3.45082e-07	up
MS.gene022349	3.22205	3.49288e-07	up
MS.gene067581	2.40433	3.51126e-07	up
MS.gene28801	2.1322	3.51905e-07	up
MS.gene065541	4.46398	3.65584e-07	up
MS.gene049378	2.27755	3.87894e-07	up
MS.gene050378	2.40609	3.94592e-07	up
MS.gene015043	2.71423	4.0041e-07	up
MS.gene013010	4.00429	4.04246e-07	up
MS.gene28426	4.12435	4.27035e-07	up
MS.gene27553	2.53121	4.38718e-07	up
MS.gene20167	2.43363	4.58955e-07	up
MS.gene022821	2.07285	4.7453e-07	up
MS.gene92539	6.15252	4.76103e-07	up
MS.gene44949	2.00158	5.07558e-07	up
MS.gene07213	3.7353	5.25673e-07	up
MS.gene34045	2.05102	5.26976e-07	up
MS.gene63714	3.9526	5.29793e-07	up
MS.gene071844	2.54957	5.4349e-07	up
MS.gene51080	2.26735	5.51173e-07	up
MS.gene47582	2.31584	5.53253e-07	up
MS.gene98143	2.26966	5.54741e-07	up
MS.gene05348	2.12244	5.54741e-07	up
MS.gene61243	2.52326	5.78709e-07	up
MS.gene030659	4.7634	5.80774e-07	up
MS.gene021955	3.54386	5.8791e-07	up
MS.gene068592	3.6213	5.88446e-07	up
MS.gene20278	2.06782	5.95283e-07	up
MS.gene027823	2.61101	6.28453e-07	up
MS.gene28044	3.69399	6.31126e-07	up
MS.gene020850	2.97428	6.52641e-07	up
MS.gene003535	2.24764	6.99637e-07	up
MS.gene030841	2.80097	7.07585e-07	up
MS.gene59150	2.70205	7.24465e-07	up
MS.gene71446	2.5343	7.56909e-07	up
MS.gene59687	2.23321	7.62545e-07	up
MS.gene08191	3.38138	7.67144e-07	up
MS.gene91400	2.43961	7.70442e-07	up
MS.gene50228	2.45764	7.71268e-07	up
MS.gene002607	2.60288	7.79106e-07	up
MS.gene69036	2.18516	7.81926e-07	up
MS.gene017589	2.13074	7.85894e-07	up
MS.gene92212	2.82102	7.89909e-07	up
MS.gene83686	3.09459	7.9163e-07	up
MS.gene30396	2.46655	7.98055e-07	up
MS.gene36133	2.77789	8.11386e-07	up
MS.gene030654	3.5893	8.12075e-07	up
MS.gene62994	2.74424	8.1892e-07	up
MS.gene074308	6.98717	8.42343e-07	up
MS.gene37449	2.83068	8.69098e-07	up
MS.gene029596	5.70885	8.91432e-07	up
MS.gene29692	2.36013	9.1401e-07	up
MS.gene29502	2.38515	9.17532e-07	up
MS.gene79631	2.49984	9.19231e-07	up
MS.gene034419	2.10951	9.23753e-07	up
MS.gene011793	3.3934	9.35326e-07	up
MS.gene06358	2.41757	9.52751e-07	up
MS.gene04617	6.12257	9.67286e-07	up
MS.gene039664	2.50668	9.79479e-07	up
MS.gene07361	3.48133	9.9068e-07	up
MS.gene77624	2.25206	1.00143e-06	up
MS.gene028137	2.39069	1.03894e-06	up
MS.gene027325	2.79406	1.0442e-06	up
MS.gene059440	2.83493	1.0833e-06	up
MS.gene32437	6.97911	1.10048e-06	up
MS.gene049759	2.7285	1.10557e-06	up
MS.gene000895	2.60348	1.12289e-06	up
MS.gene79630	2.46292	1.12621e-06	up
MS.gene072443	2.07707	1.13736e-06	up
MS.gene023471	2.39609	1.18949e-06	up
MS.gene032567	3.04256	1.212e-06	up
MS.gene24612	3.47927	1.21885e-06	up
MS.gene015211	2.46926	1.26259e-06	up
MS.gene95026	2.10954	1.26612e-06	up
MS.gene39614	2.2878	1.34448e-06	up
MS.gene56650	2.2472	1.34732e-06	up
MS.gene031881	2.52963	1.35198e-06	up
MS.gene021669	3.04577	1.35871e-06	up
MS.gene76602	2.34947	1.39237e-06	up
MS.gene51828	2.34181	1.3929e-06	up
MS.gene29837	3.74671	1.41016e-06	up
MS.gene47923	2.18355	1.41089e-06	up
MS.gene35997	2.61807	1.43389e-06	up
MS.gene70696	3.41569	1.49587e-06	up
MS.gene054969	2.36554	1.50842e-06	up
MS.gene045645	2.07157	1.52108e-06	up
MS.gene50792	2.01548	1.55173e-06	up
MS.gene23435	2.56284	1.56268e-06	up
MS.gene03131	3.95854	1.59394e-06	up
MS.gene074218	3.33281	1.59895e-06	up
MS.gene43135	2.58478	1.60049e-06	up
MS.gene51449	7.37033	1.60815e-06	up
MS.gene53342	3.07058	1.60815e-06	up
MS.gene20923	3.18157	1.64605e-06	up
MS.gene002837	2.24335	1.74918e-06	up
MS.gene97222	3.57468	1.76641e-06	up
MS.gene28740	4.42555	1.92731e-06	up
MS.gene33957	2.58303	1.96548e-06	up
MS.gene43995	3.94337	1.99246e-06	up
MS.gene88671	2.58533	2.30831e-06	up
MS.gene30897	3.00186	2.34606e-06	up
MS.gene014979	2.81267	2.36409e-06	up
MS.gene029352	2.46047	2.39039e-06	up
MS.gene062162	2.15931	2.45001e-06	up
MS.gene011868	2.39486	2.50453e-06	up
MS.gene29108	4.20501	2.5064e-06	up
MS.gene039154	2.47713	2.61467e-06	up
MS.gene34412	3.13951	2.61539e-06	up
MS.gene67910	2.21176	2.65246e-06	up
MS.gene82964	2.43035	2.66996e-06	up
MS.gene006091	3.09491	2.75344e-06	up
MS.gene73217	2.4537	2.87373e-06	up
MS.gene017560	6.01857	2.88263e-06	up
MS.gene044354	4.06298	2.89646e-06	up
MS.gene066794	3.7087	2.94198e-06	up
MS.gene52220	2.04048	2.944e-06	up
MS.gene073615	3.83373	2.96991e-06	up
MS.gene93744	3.34474	3.04513e-06	up
MS.gene034454	2.05953	3.05094e-06	up
MS.gene92167	2.07505	3.05505e-06	up
MS.gene043945	2.37648	3.06584e-06	up
MS.gene23365	4.65577	3.10752e-06	up
MS.gene98522	2.74988	3.22364e-06	up
MS.gene032032	2.47289	3.27406e-06	up
MS.gene49206	2.71652	3.3051e-06	up
MS.gene44962	2.09312	3.51542e-06	up
MS.gene33189	4.58174	3.57052e-06	up
MS.gene36998	3.25136	3.70518e-06	up
MS.gene018218	2.769	3.71504e-06	up
MS.gene86534	2.47044	3.77294e-06	up
MS.gene37090	2.49544	3.83602e-06	up
MS.gene018043	2.93654	3.87529e-06	up
MS.gene00916	2.09701	3.92388e-06	up
MS.gene66787	2.21495	3.97227e-06	up
MS.gene84720	2.30576	3.99873e-06	up
MS.gene74082	6.20067	4.02308e-06	up
MS.gene016773	2.85648	4.0893e-06	up
MS.gene022030	3.49425	4.09107e-06	up
MS.gene021988	2.52649	4.09626e-06	up
MS.gene025181	5.31377	4.16777e-06	up
MS.gene022305	2.02917	4.19609e-06	up
MS.gene049677	2.30569	4.20885e-06	up
MS.gene034382	2.15825	4.35067e-06	up
MS.gene53222	2.15563	4.38834e-06	up
MS.gene72790	2.27455	4.48396e-06	up
MS.gene48855	6.70307	4.52725e-06	up
MS.gene68797	2.21124	4.56196e-06	up
MS.gene74967	3.79912	4.71063e-06	up
MS.gene005641	2.56424	4.8052e-06	up
MS.gene066294	2.14979	4.86003e-06	up
MS.gene003357	3.96929	4.93429e-06	up
MS.gene34444	2.02581	4.99013e-06	up
MS.gene021719	3.53913	5.01123e-06	up
MS.gene33379	2.40548	5.03748e-06	up
MS.gene032930	2.07069	5.26808e-06	up
MS.gene39217	3.07967	5.28112e-06	up
MS.gene39880	2.16358	5.28125e-06	up
MS.gene006841	7.63111	5.28678e-06	up
MS.gene037806	4.57838	5.40534e-06	up
MS.gene42238	2.17091	5.49889e-06	up
MS.gene006150	5.27662	5.61841e-06	up
MS.gene034039	2.15132	5.7378e-06	up
MS.gene024376	3.66564	5.9581e-06	up
MS.gene051750	2.05563	5.9811e-06	up
MS.gene31709	2.12826	6.13502e-06	up
MS.gene31844	2.88753	6.21577e-06	up
MS.gene57941	3.78893	6.21774e-06	up
MS.gene025057	3.98137	6.27021e-06	up
MS.gene070564	2.11953	6.33813e-06	up
MS.gene057126	2.16043	6.47225e-06	up
MS.gene95383	2.59536	6.49012e-06	up
MS.gene022497	2.84583	6.75976e-06	up
MS.gene70256	6.75937	7.24566e-06	up
MS.gene047065	4.53062	7.31502e-06	up
MS.gene74832	4.72612	7.47062e-06	up
MS.gene038266	3.24585	7.61467e-06	up
MS.gene054621	2.52512	7.67984e-06	up
MS.gene040550	5.9118	7.82887e-06	up
MS.gene001948	2.10461	7.83747e-06	up
MS.gene92128	3.44762	7.88e-06	up
MS.gene97214	3.72683	7.92957e-06	up
MS.gene071927	2.90455	8.01912e-06	up
MS.gene073776	2.94935	8.01912e-06	up
MS.gene39430	2.58978	8.14428e-06	up
MS.gene057609	2.2078	8.39398e-06	up
MS.gene015032	4.01825	8.47629e-06	up
MS.gene29049	4.30549	8.6794e-06	up
MS.gene20087	3.86891	8.6794e-06	up
MS.gene55881	4.7544	8.82344e-06	up
MS.gene012961	2.98303	8.8898e-06	up
MS.gene39628	3.83101	8.99256e-06	up
MS.gene041097	2.24594	9.4169e-06	up
MS.gene23489	2.89213	9.4774e-06	up
MS.gene83032	3.0941	9.50789e-06	up
MS.gene33745	2.89577	9.68287e-06	up
MS.gene039285	2.09123	9.69233e-06	up
MS.gene06388	2.93342	9.81729e-06	up
MS.gene85172	7.0593	1.03222e-05	up
MS.gene049757	2.69577	1.04624e-05	up
MS.gene015886	2.12093	1.05884e-05	up
MS.gene029621	3.13743	1.07118e-05	up
MS.gene67931	4.88283	1.0731e-05	up
MS.gene72392	3.65644	1.08516e-05	up
MS.gene052905	4.51588	1.09259e-05	up
MS.gene91521	2.09435	1.1305e-05	up
MS.gene78154	3.24717	1.13202e-05	up
MS.gene066555	2.46718	1.13961e-05	up
MS.gene92158	2.65875	1.14545e-05	up
MS.gene92196	3.03746	1.14669e-05	up
MS.gene066658	2.25425	1.16828e-05	up
MS.gene043367	2.09436	1.18432e-05	up
MS.gene68076	5.10361	1.18715e-05	up
MS.gene054323	7.0129	1.22112e-05	up
MS.gene58519	3.12589	1.2266e-05	up
MS.gene028821	3.1957	1.24089e-05	up
MS.gene014609	2.10627	1.24536e-05	up
MS.gene21124	3.71902	1.24807e-05	up
MS.gene024324	2.81065	1.26347e-05	up
MS.gene71379	2.05269	1.27636e-05	up
MS.gene99665	2.8351	1.28327e-05	up
MS.gene38672	5.56319	1.28327e-05	up
MS.gene055946	2.39101	1.29304e-05	up
MS.gene09599	2.4817	1.30139e-05	up
MS.gene69979	3.39469	1.32552e-05	up
MS.gene007329	3.00276	1.34085e-05	up
MS.gene03306	6.68029	1.35685e-05	up
MS.gene59134	3.0513	1.37585e-05	up
MS.gene65939	2.02785	1.38817e-05	up
MS.gene74034	2.36561	1.41305e-05	up
MS.gene82732	2.27205	1.46973e-05	up
MS.gene002924	2.77117	1.52106e-05	up
MS.gene07483	2.10326	1.54444e-05	up
MS.gene050722	2.53797	1.54444e-05	up
MS.gene047107	2.09319	1.54732e-05	up
MS.gene20849	2.81123	1.60952e-05	up
MS.gene011708	3.39414	1.61044e-05	up
MS.gene000370	6.71893	1.62247e-05	up
MS.gene07072	6.32878	1.63181e-05	up
MS.gene97017	2.21034	1.66365e-05	up
MS.gene061585	4.23888	1.68528e-05	up
MS.gene070482	2.54994	1.71051e-05	up
MS.gene31306	2.24303	1.73909e-05	up
MS.gene55876	3.57219	1.74928e-05	up
MS.gene06971	2.55854	1.7587e-05	up
MS.gene07071	6.64724	1.83625e-05	up
MS.gene83458	3.83415	1.87463e-05	up
MS.gene81685	8.95812	1.89808e-05	up
MS.gene54656	2.42241	1.90788e-05	up
MS.gene79876	3.0187	1.92818e-05	up
MS.gene83416	2.1732	1.93512e-05	up
MS.gene71139	2.41871	1.93594e-05	up
MS.gene39684	3.79752	2.0697e-05	up
MS.gene009646	2.15201	2.09455e-05	up
MS.gene003731	2.6683	2.10632e-05	up
MS.gene91141	2.48677	2.11357e-05	up
MS.gene01505	3.04174	2.19919e-05	up
MS.gene070277	6.88304	2.21007e-05	up
MS.gene62454	3.6308	2.21286e-05	up
MS.gene70351	3.41664	2.29399e-05	up
MS.gene28429	4.00343	2.34235e-05	up
MS.gene034730	2.54336	2.36496e-05	up
MS.gene070813	2.54046	2.39008e-05	up
MS.gene50270	2.09504	2.39815e-05	up
MS.gene70807	2.42443	2.44244e-05	up
MS.gene050628	2.34766	2.44283e-05	up
MS.gene004970	2.50498	2.54313e-05	up
MS.gene54461	2.52785	2.54718e-05	up
MS.gene070110	2.12929	2.59202e-05	up
MS.gene68781	3.52398	2.59341e-05	up
MS.gene010691	5.73973	2.63703e-05	up
MS.gene67132	6.95113	2.64123e-05	up
MS.gene008144	2.11117	2.653e-05	up
MS.gene77959	4.30881	2.72011e-05	up
MS.gene75620	6.68408	2.81689e-05	up
MS.gene013761	4.19789	2.9775e-05	up
MS.gene002258	3.34909	2.99947e-05	up
MS.gene20655	2.06772	2.99947e-05	up
MS.gene011884	3.09933	3.04238e-05	up
MS.gene006379	3.76799	3.09644e-05	up
MS.gene71851	2.97852	3.12736e-05	up
MS.gene95459	4.55967	3.19036e-05	up
MS.gene004239	5.16924	3.20581e-05	up
MS.gene52400	3.68839	3.22777e-05	up
MS.gene61516	2.91687	3.29954e-05	up
MS.gene012253	2.80718	3.29986e-05	up
MS.gene035019	3.09936	3.32782e-05	up
MS.gene56674	2.39293	3.4466e-05	up
MS.gene87339	2.00037	3.58243e-05	up
MS.gene44455	3.66538	3.58592e-05	up
MS.gene23483	2.56485	3.60967e-05	up
MS.gene91478	2.98166	3.62525e-05	up
MS.gene043478	4.08737	3.62549e-05	up
MS.gene014350	2.29133	3.66347e-05	up
MS.gene029015	4.71204	3.66656e-05	up
MS.gene013532	2.91701	3.71724e-05	up
MS.gene070484	2.71954	3.77398e-05	up
MS.gene032121	6.86909	3.77474e-05	up
MS.gene036573	6.80327	3.8684e-05	up
MS.gene36287	4.19083	3.87889e-05	up
MS.gene061959	2.14357	4.002e-05	up
MS.gene92580	3.61237	4.02773e-05	up
MS.gene067823	3.8126	4.15316e-05	up
MS.gene045762	2.80075	4.17933e-05	up
MS.gene49905	2.47887	4.19792e-05	up
MS.gene61133	2.61099	4.23751e-05	up
MS.gene28427	3.10934	4.39376e-05	up
MS.gene060425	3.02231	4.43106e-05	up
MS.gene050935	2.07757	4.51346e-05	up
MS.gene31664	2.01783	4.5198e-05	up
MS.gene020465	2.18009	4.59748e-05	up
MS.gene09550	2.76998	4.64295e-05	up
MS.gene55912	2.4177	4.73104e-05	up
MS.gene004224	3.45611	4.73242e-05	up
MS.gene38845	2.10354	4.77005e-05	up
MS.gene97006	3.59838	4.80822e-05	up
MS.gene032179	2.38878	4.83538e-05	up
MS.gene39672	3.92791	4.89473e-05	up
MS.gene022679	2.27711	5.2128e-05	up
MS.gene24095	3.54729	5.24867e-05	up
MS.gene026689	3.1868	5.24867e-05	up
MS.gene00543	3.78429	5.26801e-05	up
MS.gene55328	2.24186	5.28169e-05	up
MS.gene000446	2.05013	5.40684e-05	up
MS.gene072060	2.17322	5.51095e-05	up
MS.gene062791	3.88395	5.55653e-05	up
MS.gene028969	2.35224	5.56645e-05	up
MS.gene01598	3.65599	5.5921e-05	up
MS.gene70254	2.82209	5.62394e-05	up
MS.gene010321	2.20578	5.65633e-05	up
MS.gene052453	6.32445	5.71931e-05	up
MS.gene45579	2.43869	5.71931e-05	up
MS.gene20054	3.75342	5.75489e-05	up
MS.gene027886	2.12315	5.78839e-05	up
MS.gene03016	2.06437	5.80513e-05	up
MS.gene82502	2.18909	5.86562e-05	up
MS.gene030653	3.29925	5.95236e-05	up
MS.gene67689	2.15822	5.95613e-05	up
MS.gene35893	2.84476	5.99412e-05	up
MS.gene072127	2.55227	6.13975e-05	up
MS.gene010101	2.44138	6.23901e-05	up
MS.gene017679	2.62019	6.24858e-05	up
MS.gene06818	2.58385	6.25455e-05	up
MS.gene030656	2.99794	6.3819e-05	up
MS.gene028252	3.36405	6.40175e-05	up
MS.gene34643	2.60471	6.40759e-05	up
MS.gene067014	2.22364	6.58274e-05	up
MS.gene51365	2.01001	6.61608e-05	up
MS.gene80612	2.53971	6.6633e-05	up
MS.gene073969	2.47015	6.67736e-05	up
MS.gene01868	3.61813	6.7939e-05	up
MS.gene054900	2.24413	6.9083e-05	up
MS.gene015257	3.66644	7.0091e-05	up
MS.gene018708	2.75519	7.06629e-05	up
MS.gene044386	2.1653	7.07502e-05	up
MS.gene070821	2.18425	7.14057e-05	up
MS.gene001335	2.32845	7.1703e-05	up
MS.gene002552	2.35306	7.286e-05	up
MS.gene30213	5.91673	7.32288e-05	up
MS.gene55220	7.05713	7.35028e-05	up
MS.gene70174	6.0958	7.40553e-05	up
MS.gene027733	6.12572	7.47712e-05	up
MS.gene43675	2.39923	7.52667e-05	up
MS.gene031902	3.65331	7.54852e-05	up
MS.gene30912	6.65964	7.57767e-05	up
MS.gene91648	4.51179	7.63306e-05	up
MS.gene011759	2.37507	7.71402e-05	up
MS.gene040105	5.94651	7.72582e-05	up
MS.gene026613	6.60716	7.9327e-05	up
MS.gene87741	3.26963	8.04604e-05	up
MS.gene62974	2.98528	8.22457e-05	up
MS.gene029858	5.97293	8.38436e-05	up
MS.gene064688	4.28558	8.46083e-05	up
MS.gene73108	2.66789	8.4755e-05	up
MS.gene010495	6.69717	8.52155e-05	up
MS.gene34335	2.25118	8.55714e-05	up
MS.gene017360	2.11329	8.59215e-05	up
MS.gene040133	3.05442	8.5995e-05	up
MS.gene039767	2.77682	8.6348e-05	up
MS.gene24453	3.77077	8.75453e-05	up
MS.gene70257	4.1177	8.83676e-05	up
MS.gene42823	6.02762	8.86555e-05	up
MS.gene52038	2.14509	8.89681e-05	up
MS.gene91650	4.27835	9.09213e-05	up
MS.gene30996	4.27461	9.24478e-05	up
MS.gene08834	4.30464	9.24895e-05	up
MS.gene041895	2.03057	9.28207e-05	up
MS.gene022109	2.35167	9.30171e-05	up
MS.gene64010	3.779	9.31436e-05	up
MS.gene06299	2.54588	9.3456e-05	up
MS.gene74083	2.39635	9.76253e-05	up
MS.gene78338	2.10659	9.87183e-05	up
MS.gene74931	2.00991	9.88056e-05	up
MS.gene62462	6.69529	9.95806e-05	up
MS.gene056186	5.59992	0.000100019	up
MS.gene70249	5.42453	0.000100332	up
MS.gene018963	2.36065	0.000100784	up
MS.gene72187	6.38799	0.000101598	up
MS.gene004231	3.27061	0.000103057	up
MS.gene23364	2.49942	0.000106163	up
MS.gene062752	4.19973	0.000108302	up
MS.gene61232	3.65637	0.000108828	up
MS.gene94151	3.05243	0.000110122	up
MS.gene00403	3.88857	0.000111808	up
MS.gene052421	6.09075	0.000112257	up
MS.gene67372	3.12921	0.000113919	up
MS.gene35085	2.5987	0.000114578	up
MS.gene024325	2.037	0.000114934	up
MS.gene072537	2.65359	0.000115093	up
MS.gene031304	6.88338	0.000115489	up
MS.gene056772	2.31271	0.000116328	up
MS.gene028818	4.97415	0.000119301	up
MS.gene88673	3.36734	0.000119364	up
MS.gene018274	3.07348	0.000120703	up
MS.gene74495	2.43143	0.000121859	up
MS.gene06605	2.80578	0.000124092	up
MS.gene053776	2.5521	0.000124319	up
MS.gene054971	2.01489	0.000127651	up
MS.gene048128	4.0213	0.000130479	up
MS.gene36009	2.60295	0.00013236	up
MS.gene072770	3.4862	0.000136647	up
MS.gene008623	2.896	0.000136914	up
MS.gene79577	4.03098	0.000138946	up
MS.gene29608	4.03997	0.000139432	up
MS.gene57228	4.12233	0.000139483	up
MS.gene27707	5.82952	0.000140842	up
MS.gene013400	2.64383	0.000140928	up
MS.gene070122	5.71769	0.000142327	up
MS.gene021095	6.52186	0.000143186	up
MS.gene037279	3.12599	0.000146035	up
MS.gene09137	2.7454	0.000146849	up
MS.gene30169	3.61269	0.000151044	up
MS.gene61708	5.52654	0.000153078	up
MS.gene23490	6.41741	0.00015747	up
MS.gene51093	3.0595	0.000159477	up
MS.gene50626	2.23704	0.000160696	up
MS.gene25554	2.94946	0.000162739	up
MS.gene018226	2.4993	0.000165595	up
MS.gene017075	3.44359	0.000166175	up
MS.gene99465	2.3294	0.000166968	up
MS.gene04067	2.07018	0.000167049	up
MS.gene043271	2.90109	0.000171569	up
MS.gene010412	4.19148	0.00017312	up
MS.gene71674	3.01033	0.000173189	up
MS.gene057719	5.06492	0.00017378	up
MS.gene013628	2.62934	0.000175696	up
MS.gene032762	2.00835	0.000176481	up
MS.gene30696	2.87018	0.000176554	up
MS.gene29255	2.48237	0.000177656	up
MS.gene011337	2.34571	0.000178987	up
MS.gene039468	5.88314	0.000179834	up
MS.gene43478	4.35517	0.000183777	up
MS.gene56594	2.4354	0.000183831	up
MS.gene61710	3.70135	0.000187062	up
MS.gene52707	3.30054	0.000188371	up
MS.gene86108	2.54696	0.000190487	up
MS.gene007442	2.35152	0.000192766	up
MS.gene31009	2.99867	0.000192797	up
MS.gene047073	2.24881	0.000193074	up
MS.gene052084	2.12037	0.000193523	up
MS.gene000929	3.09287	0.000195979	up
MS.gene31028	2.01113	0.000200473	up
MS.gene019284	2.2152	0.000200812	up
MS.gene66606	4.08544	0.000201419	up
MS.gene043500	2.19174	0.000201544	up
MS.gene82449	2.99402	0.000203176	up
MS.gene80977	2.37557	0.000205628	up
MS.gene067172	2.89645	0.000209215	up
MS.gene80585	3.73749	0.000211457	up
MS.gene84034	3.18883	0.000212631	up
MS.gene021120	2.57117	0.00021705	up
MS.gene80308	2.03699	0.000217292	up
MS.gene61200	3.59989	0.000218414	up
MS.gene048380	2.94929	0.000218451	up
MS.gene025842	2.60287	0.000219342	up
MS.gene035618	2.49677	0.000222535	up
MS.gene022281	3.23151	0.000223095	up
MS.gene42233	2.71052	0.000224564	up
MS.gene76569	5.96624	0.000227474	up
MS.gene023039	2.70661	0.000228245	up
MS.gene015309	6.16256	0.000229886	up
MS.gene047052	2.72012	0.000233551	up
MS.gene029453	2.86133	0.00023396	up
MS.gene31380	3.58796	0.000234201	up
MS.gene54986	2.16141	0.000235894	up
MS.gene49935	2.40046	0.000242343	up
MS.gene038024	2.10116	0.000245621	up
MS.gene59624	2.69106	0.000246406	up
MS.gene53704	6.24254	0.000247531	up
MS.gene44129	2.14087	0.00025097	up
MS.gene060506	4.17332	0.000251677	up
MS.gene71138	2.27878	0.000261093	up
MS.gene70225	3.62475	0.000261972	up
MS.gene015996	6.22504	0.00026966	up
MS.gene023741	6.152	0.000270339	up
MS.gene04215	2.4642	0.000270339	up
MS.gene31263	2.84859	0.000272228	up
MS.gene49715	5.62318	0.000278998	up
MS.gene40717	4.17198	0.000280893	up
MS.gene047932	3.88164	0.000283466	up
MS.gene90349	2.15166	0.000283689	up
MS.gene071764	2.3783	0.000283933	up
MS.gene014391	3.66579	0.000289583	up
MS.gene049539	2.22378	0.000291849	up
MS.gene67458	2.35531	0.000292454	up
MS.gene57914	3.5265	0.000295664	up
MS.gene039719	2.01411	0.000298383	up
MS.gene035438	2.38668	0.000299258	up
MS.gene60797	2.08261	0.000301543	up
MS.gene051621	2.11777	0.000303786	up
MS.gene87258	6.11679	0.000303912	up
MS.gene26252	4.31785	0.000305518	up
MS.gene003462	5.11771	0.000308718	up
MS.gene030759	3.23944	0.000311883	up
MS.gene30762	3.28428	0.000311917	up
MS.gene75976	2.94577	0.0003131	up
MS.gene91792	3.23088	0.000315016	up
MS.gene069129	2.53138	0.000315506	up
MS.gene033298	3.0454	0.000315835	up
MS.gene036146	2.02549	0.000326051	up
MS.gene87630	2.1317	0.000329001	up
MS.gene64785	3.11673	0.000330037	up
MS.gene48043	4.81006	0.000332287	up
MS.gene38663	3.33286	0.000333918	up
MS.gene058222	2.72007	0.00033611	up
MS.gene33943	2.03182	0.000338018	up
MS.gene54700	2.99764	0.000340805	up
MS.gene54644	6.76699	0.000343778	up
MS.gene013406	2.24708	0.000347182	up
MS.gene76902	2.2191	0.000351327	up
MS.gene86510	2.59832	0.00035884	up
MS.gene052318	3.23924	0.00035965	up
MS.gene99882	2.89518	0.000360826	up
MS.gene031929	3.77304	0.000368743	up
MS.gene79707	2.45815	0.000374716	up
MS.gene028253	2.56515	0.000377769	up
MS.gene20448	2.02409	0.000380033	up
MS.gene47946	3.30926	0.000381564	up
MS.gene033756	2.21873	0.000383583	up
MS.gene44680	5.8361	0.000384079	up
MS.gene014833	2.00637	0.000388495	up
MS.gene041128	3.2541	0.000391691	up
MS.gene029391	2.38531	0.000392129	up
MS.gene032623	3.38852	0.000392189	up
MS.gene07505	3.00881	0.000393792	up
MS.gene94186	2.40276	0.00039492	up
MS.gene86525	3.5854	0.000400322	up
MS.gene50880	2.2591	0.000401051	up
MS.gene06485	2.06497	0.00040356	up
MS.gene041159	2.92599	0.000410231	up
MS.gene010429	2.21192	0.000414317	up
MS.gene054159	2.7594	0.000418378	up
MS.gene69125	2.07623	0.000421321	up
MS.gene074371	5.52758	0.000437184	up
MS.gene80374	5.57055	0.000447018	up
MS.gene23413	2.02341	0.000447206	up
MS.gene063247	3.47905	0.000448294	up
MS.gene048323	2.65007	0.000462369	up
MS.gene32854	3.13723	0.000467868	up
MS.gene004715	5.91728	0.000477414	up
MS.gene53840	3.95753	0.000479315	up
MS.gene90905	3.45637	0.000479497	up
MS.gene69372	3.47474	0.000479805	up
MS.gene44569	6.72692	0.000482175	up
MS.gene65330	2.15618	0.000482725	up
MS.gene31531	4.11038	0.000490543	up
MS.gene038293	5.56537	0.000490646	up
MS.gene010409	2.24407	0.000493582	up
MS.gene40255	2.21859	0.00049677	up
MS.gene00424	6.17064	0.000503417	up
MS.gene44123	2.70861	0.000503417	up
MS.gene77094	2.87063	0.000513304	up
MS.gene68641	2.7215	0.00051353	up
MS.gene061233	4.80488	0.000515676	up
MS.gene95107	3.78445	0.000515995	up
MS.gene022153	2.01567	0.000516043	up
MS.gene20612	2.27709	0.000516283	up
MS.gene043355	5.68412	0.000516489	up
MS.gene073308	5.96972	0.000516733	up
MS.gene43509	2.12232	0.000520779	up
MS.gene062583	2.2664	0.00052409	up
MS.gene54805	2.11164	0.000524777	up
MS.gene003916	2.4783	0.000535727	up
MS.gene049740	2.20121	0.000536047	up
MS.gene09836	2.09339	0.000543366	up
MS.gene35822	2.10937	0.000549301	up
MS.gene011629	2.07817	0.000549578	up
MS.gene027046	2.81432	0.000563695	up
MS.gene055401	2.24334	0.000565696	up
MS.gene043365	2.66567	0.000576813	up
MS.gene33190	6.64924	0.000578144	up
MS.gene70611	4.51761	0.000578843	up
MS.gene047642	2.09668	0.000583733	up
MS.gene86884	2.2436	0.000584495	up
MS.gene24385	2.08179	0.000587091	up
MS.gene24837	2.82529	0.00059762	up
MS.gene037405	3.52714	0.000597699	up
MS.gene048571	2.32178	0.000602613	up
MS.gene97788	2.66833	0.000607029	up
MS.gene63747	2.09201	0.000610199	up
MS.gene022045	2.03234	0.000619925	up
MS.gene01552	2.14822	0.000626254	up
MS.gene058933	3.14126	0.000630023	up
MS.gene57576	2.08167	0.000633473	up
MS.gene37156	2.02462	0.000635333	up
MS.gene068993	2.46744	0.000637983	up
MS.gene57326	3.03734	0.000638752	up
MS.gene22214	3.32229	0.000639322	up
MS.gene057209	6.03206	0.000639547	up
MS.gene61711	5.65633	0.000641303	up
MS.gene41207	2.25713	0.000644019	up
MS.gene039681	4.43353	0.000651932	up
MS.gene062187	2.30843	0.000653291	up
MS.gene054491	3.98035	0.000654816	up
MS.gene071810	2.4426	0.000654956	up
MS.gene58671	3.859	0.000654979	up
MS.gene047684	2.139	0.000657187	up
MS.gene060189	3.10171	0.0006615	up
MS.gene062249	2.16354	0.000663159	up
MS.gene57757	4.82305	0.000669861	up
MS.gene028990	2.35242	0.000671084	up
MS.gene73747	5.26691	0.000671527	up
MS.gene054322	5.15729	0.000674182	up
MS.gene036273	6.38647	0.000676127	up
MS.gene070872	2.048	0.000680353	up
MS.gene54193	6.4597	0.000681211	up
MS.gene83150	6.32895	0.000682103	up
MS.gene067016	2.44709	0.000685224	up
MS.gene50451	3.37482	0.000691177	up
MS.gene72672	5.45063	0.000692144	up
MS.gene009720	3.53582	0.000693712	up
MS.gene44772	2.57464	0.000694162	up
MS.gene70633	3.65285	0.000697428	up
MS.gene89102	3.33873	0.000705871	up
MS.gene047697	4.03607	0.000708387	up
MS.gene04574	2.05346	0.000709204	up
MS.gene043289	3.00948	0.000710144	up
MS.gene31529	6.04369	0.00071071	up
MS.gene83630	4.34713	0.000711704	up
MS.gene048881	5.95249	0.00071659	up
MS.gene041089	2.26861	0.000722004	up
MS.gene00779	8.80694	0.00073204	up
MS.gene012874	3.38746	0.000736918	up
MS.gene36624	2.40696	0.000736937	up
MS.gene40059	4.09776	0.000742025	up
MS.gene005046	2.17789	0.000751293	up
MS.gene009319	3.03207	0.000752002	up
MS.gene053479	2.4462	0.000768351	up
MS.gene95903	2.22217	0.000768892	up
MS.gene007969	2.46019	0.000772088	up
MS.gene052071	2.28563	0.000788001	up
MS.gene36456	3.81648	0.000789019	up
MS.gene56527	2.63731	0.000789359	up
MS.gene016160	2.34078	0.000792866	up
MS.gene75080	3.69888	0.000795702	up
MS.gene064837	2.28967	0.000795967	up
MS.gene44568	2.43266	0.000806218	up
MS.gene065295	2.95474	0.000813949	up
MS.gene028032	5.73599	0.000816242	up
MS.gene021696	2.86041	0.000818038	up
MS.gene31013	2.29938	0.000840925	up
MS.gene46170	5.4904	0.000855268	up
MS.gene030211	3.2225	0.000858085	up
MS.gene49298	2.93828	0.000860531	up
MS.gene064788	5.43722	0.000862847	up
MS.gene52145	2.15081	0.000868891	up
MS.gene54590	2.53173	0.000917043	up
MS.gene005146	3.70147	0.000925773	up
MS.gene78208	2.94774	0.000933397	up
MS.gene056597	5.23522	0.000934123	up
MS.gene036922	2.08001	0.000934652	up
MS.gene85483	2.8265	0.000938592	up
MS.gene26302	3.15211	0.00094523	up
MS.gene058498	3.52149	0.000945415	up
MS.gene23598	2.40589	0.000948752	up
MS.gene89061	2.01411	0.000953542	up
MS.gene058702	3.58377	0.000954064	up
MS.gene83018	6.39626	0.000959358	up
MS.gene56462	3.25769	0.000974903	up
MS.gene42365	2.08883	0.000987565	up
MS.gene047969	2.4424	0.000988427	up
MS.gene60181	2.36899	0.000990922	up
MS.gene058881	2.756	0.000995511	up
MS.gene002507	4.71973	0.000996733	up
MS.gene79731	4.06487	0.00102728	up
MS.gene029430	2.01411	0.00103255	up
MS.gene056983	3.14514	0.00103403	up
MS.gene70112	3.28252	0.00105675	up
MS.gene011326	2.3402	0.00105946	up
MS.gene058501	2.21071	0.00109587	up
MS.gene005306	2.78985	0.00110016	up
MS.gene71091	4.14163	0.00110856	up
MS.gene32100	3.31361	0.00111212	up
MS.gene28425	4.08052	0.00111382	up
MS.gene062852	2.44553	0.00112849	up
MS.gene52297	3.19909	0.0011287	up
MS.gene006842	5.67118	0.00114099	up
MS.gene017554	6.47455	0.00114567	up
MS.gene63017	4.95839	0.00114608	up
MS.gene041368	2.06554	0.0011589	up
MS.gene042500	2.37747	0.00119116	up
MS.gene26162	2.17825	0.00120835	up
MS.gene24337	3.97722	0.00121507	up
MS.gene002295	6.33191	0.00121595	up
MS.gene63545	2.35156	0.00121637	up
MS.gene87917	2.20297	0.00122023	up
MS.gene007338	6.43103	0.00122031	up
MS.gene70813	2.1219	0.00122123	up
MS.gene000652	3.50299	0.00122279	up
MS.gene58072	4.72709	0.001224	up
MS.gene52719	2.00146	0.00123149	up
MS.gene007701	2.37053	0.00124061	up
MS.gene37884	3.08775	0.00124304	up
MS.gene006911	2.52656	0.00125895	up
MS.gene67368	5.82491	0.00125906	up
MS.gene20251	2.11594	0.0012666	up
MS.gene002996	8.19393	0.00127992	up
MS.gene005524	3.17795	0.00130941	up
MS.gene26492	2.2617	0.00133175	up
MS.gene024576	2.49118	0.00133455	up
MS.gene23068	3.58306	0.00133573	up
MS.gene87534	2.31493	0.00135717	up
MS.gene92924	4.17648	0.00137044	up
MS.gene032141	5.35166	0.00137125	up
MS.gene97216	4.00305	0.00137747	up
MS.gene43592	3.49461	0.00139784	up
MS.gene46519	5.88256	0.00140875	up
MS.gene56000	3.48905	0.00141865	up
MS.gene060298	3.29614	0.00142155	up
MS.gene060244	2.36462	0.00144603	up
MS.gene016128	2.0723	0.00146608	up
MS.gene89331	2.90786	0.00146796	up
MS.gene004767	2.51624	0.00146851	up
MS.gene007749	2.71902	0.00147108	up
MS.gene33247	2.24552	0.00148483	up
MS.gene79270	5.46185	0.00148695	up
MS.gene050710	3.08498	0.00150792	up
MS.gene86530	4.41229	0.00153749	up
MS.gene64899	3.13897	0.00154417	up
MS.gene33043	2.40019	0.0015616	up
MS.gene052467	2.67149	0.00160753	up
MS.gene02608	4.65611	0.0016663	up
MS.gene49321	2.44444	0.00168542	up
MS.gene96530	2.19096	0.00169386	up
MS.gene025233	3.3373	0.00169905	up
MS.gene042167	2.32763	0.00171277	up
MS.gene38513	2.1989	0.00171368	up
MS.gene51542	3.76923	0.00172343	up
MS.gene39141	2.3246	0.00172635	up
MS.gene59217	2.11461	0.0017313	up
MS.gene92293	2.00116	0.00174337	up
MS.gene07596	2.37592	0.00176567	up
MS.gene46378	2.57534	0.00177081	up
MS.gene30770	2.03876	0.00178505	up
MS.gene24550	2.90559	0.00178586	up
MS.gene023744	5.97038	0.0017982	up
MS.gene08190	4.32005	0.00184247	up
MS.gene025175	3.64377	0.00186437	up
MS.gene82196	2.78292	0.00187237	up
MS.gene54860	3.51605	0.00187463	up
MS.gene056595	3.58987	0.00188743	up
MS.gene016696	2.1973	0.00191132	up
MS.gene041158	3.58402	0.00191678	up
MS.gene038461	4.37765	0.00192596	up
MS.gene054902	2.14203	0.00192924	up
MS.gene52550	2.75135	0.00192985	up
MS.gene23272	2.54701	0.0019591	up
MS.gene25858	5.28555	0.0019676	up
MS.gene94574	2.03551	0.00197141	up
MS.gene064694	5.57279	0.00197613	up
MS.gene21246	5.94986	0.00200754	up
MS.gene02097	3.34169	0.0020097	up
MS.gene03821	2.50612	0.00201272	up
MS.gene071758	5.35895	0.00201928	up
MS.gene035919	2.38941	0.00203363	up
MS.gene00430	2.54714	0.00203495	up
MS.gene78072	3.27642	0.00204272	up
MS.gene070191	2.12016	0.00208606	up
MS.gene071073	3.76527	0.00210539	up
MS.gene68633	2.40516	0.00213383	up
MS.gene036299	3.78919	0.0021617	up
MS.gene80861	5.1789	0.0021752	up
MS.gene071490	3.6824	0.00219844	up
MS.gene03646	2.00312	0.00221247	up
MS.gene36378	5.91432	0.00221397	up
MS.gene06931	2.79842	0.00221931	up
MS.gene011926	2.01537	0.00222822	up
MS.gene45929	2.00482	0.00223926	up
MS.gene76380	5.34694	0.00226513	up
MS.gene66341	2.86602	0.00226778	up
MS.gene25243	3.28757	0.00226826	up
MS.gene32913	5.6668	0.00227528	up
MS.gene90695	2.03102	0.00227555	up
MS.gene72872	5.09265	0.00228713	up
MS.gene97113	5.24251	0.00229212	up
MS.gene004958	2.16705	0.00229475	up
MS.gene005525	3.83087	0.00230391	up
MS.gene064584	2.22571	0.0023195	up
MS.gene018294	5.72978	0.00232061	up
MS.gene64878	6.0745	0.00232599	up
MS.gene94011	2.83445	0.00235546	up
MS.gene69930	2.39634	0.00235796	up
MS.gene042643	3.75174	0.00236884	up
MS.gene030273	2.07234	0.00236961	up
MS.gene27363	2.65962	0.00240749	up
MS.gene057951	4.37615	0.00241236	up
MS.gene31705	2.0996	0.00241975	up
MS.gene87649	3.42018	0.0024198	up
MS.gene63715	4.14034	0.00242023	up
MS.gene78134	5.43299	0.00243546	up
MS.gene072399	3.25901	0.00243548	up
MS.gene30285	2.88675	0.00243716	up
MS.gene57674	2.68934	0.00244123	up
MS.gene95893	3.68542	0.0024459	up
MS.gene49144	2.33213	0.0024538	up
MS.gene057466	4.30681	0.00246404	up
MS.gene047560	3.62465	0.00254192	up
MS.gene50627	2.65567	0.00255731	up
MS.gene006464	2.56963	0.00255769	up
MS.gene96147	5.75864	0.002559	up
MS.gene51367	2.12252	0.00256487	up
MS.gene05812	2.68994	0.0025852	up
MS.gene007388	2.00634	0.00260135	up
MS.gene060050	4.36291	0.00262318	up
MS.gene84712	2.93914	0.00263827	up
MS.gene86452	3.64596	0.00264085	up
MS.gene021051	2.52702	0.00264571	up
MS.gene70894	2.52866	0.00268273	up
MS.gene06026	2.74699	0.0026997	up
MS.gene59541	3.00173	0.00270124	up
MS.gene042111	2.48043	0.00271106	up
MS.gene95272	3.12457	0.0027377	up
MS.gene061922	4.84436	0.00275541	up
MS.gene70839	2.43823	0.00278917	up
MS.gene057208	2.46049	0.00281354	up
MS.gene64466	3.21851	0.00281545	up
MS.gene009406	2.01609	0.00284198	up
MS.gene94076	2.26333	0.00285225	up
MS.gene01874	2.5257	0.00286574	up
MS.gene062938	2.47459	0.00289144	up
MS.gene065160	5.21388	0.00294022	up
MS.gene31280	2.10164	0.00295364	up
MS.gene027807	4.70244	0.00298043	up
MS.gene92811	2.26287	0.00300936	up
MS.gene019167	3.16108	0.00301139	up
MS.gene036485	2.73115	0.00301526	up
MS.gene001809	2.0043	0.00302298	up
MS.gene073960	3.0708	0.00305515	up
MS.gene93151	5.72625	0.00306333	up
MS.gene074295	5.97898	0.00306496	up
MS.gene050822	5.63721	0.00307595	up
MS.gene028860	4.90189	0.00309007	up
MS.gene03274	2.23975	0.00311626	up
MS.gene36242	2.02311	0.00311911	up
MS.gene26673	3.0623	0.00311911	up
MS.gene37816	2.022	0.00312558	up
MS.gene002892	4.23323	0.00312671	up
MS.gene53429	5.97122	0.00320911	up
MS.gene07002	2.64202	0.00321483	up
MS.gene83509	2.03719	0.00321588	up
MS.gene85907	2.04846	0.0032264	up
MS.gene061462	2.27474	0.00322677	up
MS.gene070777	5.61808	0.00323338	up
MS.gene04518	2.24335	0.00324203	up
MS.gene014755	6.13371	0.00332393	up
MS.gene99775	3.79958	0.00334385	up
MS.gene49143	2.10178	0.00341708	up
MS.gene056600	2.51833	0.00345878	up
MS.gene032191	2.0289	0.00346097	up
MS.gene013881	2.11134	0.00346097	up
MS.gene013206	3.07134	0.00348141	up
MS.gene065580	2.08711	0.00348279	up
MS.gene072265	2.05304	0.0035348	up
MS.gene35653	2.48091	0.00358842	up
MS.gene44245	2.24515	0.00360254	up
MS.gene010369	4.31597	0.00366408	up
MS.gene29327	4.06138	0.00369432	up
MS.gene70253	4.88832	0.0037204	up
MS.gene005411	3.56928	0.00375103	up
MS.gene53629	2.84071	0.00376675	up
MS.gene043315	3.32472	0.00380076	up
MS.gene062948	2.58005	0.00384035	up
MS.gene35731	2.98096	0.00387348	up
MS.gene011363	5.54279	0.00388096	up
MS.gene02730	2.48386	0.00389957	up
MS.gene026612	2.01536	0.00396187	up
MS.gene33862	5.14673	0.00401281	up
MS.gene018023	3.95926	0.00401358	up
MS.gene71730	2.4372	0.00401718	up
MS.gene031090	2.45912	0.00404088	up
MS.gene073778	3.06834	0.00404941	up
MS.gene028734	5.8199	0.00407589	up
MS.gene89004	2.16102	0.00410276	up
MS.gene70193	2.73931	0.00412163	up
MS.gene31383	2.67283	0.00416471	up
MS.gene058435	2.48824	0.00419804	up
MS.gene018382	2.22042	0.00420275	up
MS.gene70811	2.05049	0.0042188	up
MS.gene031899	4.95844	0.00424309	up
MS.gene030631	2.96119	0.00424528	up
MS.gene42414	2.72058	0.00425417	up
MS.gene028335	6.1371	0.00441317	up
MS.gene028987	5.50127	0.00443902	up
MS.gene26164	5.00515	0.00447158	up
MS.gene22760	3.03839	0.00449069	up
MS.gene99392	2.14814	0.00451293	up
MS.gene044216	2.09008	0.00451618	up
MS.gene61610	5.00778	0.00452374	up
MS.gene002525	4.02057	0.00452408	up
MS.gene71389	3.05758	0.00457212	up
MS.gene56482	6.06222	0.00457995	up
MS.gene35920	2.79949	0.00458019	up
MS.gene042935	5.43271	0.00460654	up
MS.gene25680	2.41089	0.00465518	up
MS.gene021990	2.00883	0.00467436	up
MS.gene37460	2.4915	0.00472717	up
MS.gene26916	3.03554	0.00473262	up
MS.gene010283	4.91437	0.00474371	up
MS.gene044077	2.37397	0.00475623	up
MS.gene072111	5.53856	0.00485262	up
MS.gene026059	3.88582	0.00488195	up
MS.gene43593	2.82167	0.00495159	up
MS.gene76105	5.41545	0.00495159	up
MS.gene020901	3.76702	0.00496243	up
MS.gene027349	2.58847	0.00499499	up
MS.gene53933	2.5584	0.00500478	up
MS.gene27592	2.07578	0.00503676	up
MS.gene23553	4.44861	0.00510231	up
MS.gene38762	2.38483	0.0051199	up
MS.gene028982	4.22577	0.00512345	up
MS.gene023821	2.0095	0.00513232	up
MS.gene52222	3.74668	0.00518298	up
MS.gene49806	2.11318	0.00518583	up
MS.gene56982	3.15483	0.00523869	up
MS.gene049995	2.56573	0.00525889	up
MS.gene99141	2.14032	0.00529776	up
MS.gene98241	2.38047	0.00541344	up
MS.gene20851	2.77608	0.00545604	up
MS.gene000689	2.43395	0.00547763	up
MS.gene87543	3.37889	0.00549931	up
MS.gene66830	3.21551	0.00550307	up
MS.gene006553	2.69467	0.00554166	up
MS.gene001182	4.9617	0.00556652	up
MS.gene053217	2.2273	0.00557168	up
MS.gene043464	2.28399	0.00569439	up
MS.gene021747	4.59379	0.00571638	up
MS.gene031822	3.91552	0.00573475	up
MS.gene52813	2.50818	0.00576453	up
MS.gene34791	2.64526	0.00584617	up
MS.gene49894	2.48411	0.0058547	up
MS.gene42474	4.28264	0.00587611	up
MS.gene23279	2.68318	0.00591797	up
MS.gene070175	3.21175	0.0059746	up
MS.gene90755	2.98379	0.00597518	up
MS.gene03929	6.1539	0.00597678	up
MS.gene021873	3.22252	0.00600531	up
MS.gene044945	4.29466	0.00608244	up
MS.gene83839	4.20191	0.00613552	up
MS.gene80408	2.2921	0.00616176	up
MS.gene072803	2.31816	0.0062017	up
MS.gene83651	5.70604	0.00624133	up
MS.gene45818	4.30992	0.00625741	up
MS.gene35745	3.76352	0.00626743	up
MS.gene022160	2.34001	0.00626839	up
MS.gene98751	2.2552	0.00627626	up
MS.gene37685	4.82465	0.0062976	up
MS.gene72667	3.46164	0.00634386	up
MS.gene00483	2.08577	0.00639187	up
MS.gene062191	5.53827	0.00643138	up
MS.gene54097	2.09036	0.0064705	up
MS.gene76304	5.5352	0.00648209	up
MS.gene008011	2.34402	0.00657671	up
MS.gene071847	3.32202	0.0065801	up
MS.gene013694	2.07191	0.00661094	up
MS.gene045031	3.07705	0.00664004	up
MS.gene071849	2.53208	0.00667597	up
MS.gene035059	2.74544	0.00668699	up
MS.gene29199	3.29116	0.0066946	up
MS.gene00877	3.05194	0.00670852	up
MS.gene77562	3.64645	0.00674915	up
MS.gene017531	2.08708	0.0067572	up
MS.gene41880	2.1968	0.00680844	up
MS.gene65926	2.57827	0.00681873	up
MS.gene61401	5.15761	0.00682347	up
MS.gene015998	5.31338	0.00687331	up
MS.gene69789	5.15762	0.00689832	up
MS.gene80074	2.51203	0.00695499	up
MS.gene015147	3.07411	0.0069663	up
MS.gene47898	2.334	0.00698733	up
MS.gene039769	2.34898	0.00699822	up
MS.gene014612	5.49066	0.00700211	up
MS.gene41744	4.44081	0.00702649	up
MS.gene74940	3.28134	0.00711479	up
MS.gene056347	2.11885	0.00713732	up
MS.gene68931	4.86143	0.0071672	up
MS.gene22342	2.71316	0.00724726	up
MS.gene050524	5.35605	0.00727262	up
MS.gene65498	2.88233	0.00735996	up
MS.gene024026	3.18929	0.00736237	up
MS.gene007615	2.4832	0.00749516	up
MS.gene59243	5.55888	0.00757467	up
MS.gene050202	4.65599	0.00757476	up
MS.gene011203	3.56092	0.00763981	up
MS.gene059496	4.52048	0.007648	up
MS.gene43733	3.2007	0.0076533	up
MS.gene046353	2.1712	0.00776643	up
MS.gene53265	4.479	0.00778579	up
MS.gene46422	3.579	0.00781025	up
MS.gene057687	2.22133	0.00782341	up
MS.gene67022	5.56301	0.00789905	up
MS.gene58390	4.2285	0.0079053	up
MS.gene047303	3.66367	0.00794093	up
MS.gene017918	2.01896	0.00795277	up
MS.gene51372	4.70587	0.00800682	up
MS.gene02678	4.34275	0.00805289	up
MS.gene65941	3.2183	0.00810315	up
MS.gene036212	3.5737	0.00812813	up
MS.gene32138	4.559	0.00814521	up
MS.gene39701	5.15245	0.00814732	up
MS.gene97146	4.11133	0.00815553	up
MS.gene21149	5.11293	0.00827834	up
MS.gene072212	3.82141	0.00834249	up
MS.gene49153	3.53596	0.00834641	up
MS.gene037019	5.2594	0.00835245	up
MS.gene43996	6.06247	0.00838382	up
MS.gene26432	4.38056	0.00841136	up
MS.gene033318	2.59147	0.00842554	up
MS.gene047888	2.95369	0.00843016	up
MS.gene49330	2.12405	0.00843919	up
MS.gene31622	2.06659	0.00844523	up
MS.gene27233	3.27049	0.00844629	up
MS.gene019763	4.80652	0.00846276	up
MS.gene067979	2.24011	0.00853546	up
MS.gene98523	3.82281	0.00854504	up
MS.gene51512	4.47925	0.00854539	up
MS.gene29175	5.36973	0.00855501	up
MS.gene047686	2.13976	0.00858839	up
MS.gene005312	5.25419	0.00860119	up
MS.gene70058	3.44592	0.00862551	up
MS.gene026259	2.72767	0.00864697	up
MS.gene015784	2.56514	0.00865465	up
MS.gene41463	4.59704	0.00870845	up
MS.gene045618	2.77048	0.00874761	up
MS.gene91619	2.15193	0.00876469	up
MS.gene39979	4.68847	0.00877754	up
MS.gene92101	2.2057	0.00879089	up
MS.gene071973	3.80533	0.00885853	up
[truncated: 5,569 more rows]

## Sheet: G3
GeneID	log2FoldChange	Adjust Pvalue	up/down
MS.gene31801	7.92038	2.44026e-94	up
MS.gene046807	6.61397	2.53537e-85	up
MS.gene054115	7.25272	4.69855e-57	up
MS.gene32362	7.8269	1.63282e-51	up
MS.gene067308	6.65729	1.23418e-41	up
MS.gene06235	6.13136	5.96468e-36	up
MS.gene26130	4.93769	3.29602e-33	up
MS.gene34486	10.9006	4.627e-31	up
MS.gene78549	4.72562	2.60306e-29	up
MS.gene84836	6.27972	4.32201e-27	up
MS.gene21745	3.84224	1.19449e-24	up
MS.gene064503	4.76055	2.96898e-24	up
MS.gene016682	9.01735	5.20903e-24	up
MS.gene41428	11.1626	7.94344e-24	up
MS.gene068413	13.5318	8.06475e-24	up
MS.gene21879	3.4748	8.58611e-24	up
MS.gene08076	2.12878	1.52664e-23	up
MS.gene73217	10.0326	2.16654e-23	up
MS.gene84723	6.12058	2.64596e-23	up
MS.gene38774	2.57321	2.83519e-23	up
MS.gene84529	8.26326	2.09386e-22	up
MS.gene064788	6.1019	4.76915e-22	up
MS.gene039190	6.72986	7.37422e-22	up
MS.gene04107	7.25793	9.53289e-22	up
MS.gene068670	6.79141	1.83194e-21	up
MS.gene021811	4.67342	3.37494e-21	up
MS.gene027890	2.23056	4.24012e-21	up
MS.gene048798	2.72045	4.59873e-21	up
MS.gene04131	3.08076	7.18015e-21	up
MS.gene87637	6.24662	3.07745e-20	up
MS.gene064236	2.85963	4.0125e-20	up
MS.gene29018	8.30141	4.67068e-20	up
MS.gene003031	3.43361	1.09219e-19	up
MS.gene063446	6.83134	1.24782e-19	up
MS.gene037710	9.27948	1.5431e-19	up
MS.gene97588	5.61154	1.56834e-19	up
MS.gene062834	7.38245	2.3063e-19	up
MS.gene032901	2.27151	2.34186e-19	up
MS.gene070570	2.43358	2.34186e-19	up
MS.gene072976	3.82023	2.43257e-19	up
MS.gene22981	7.05066	3.55455e-19	up
MS.gene037560	12.1985	8.74183e-19	up
MS.gene060510	7.54419	9.90238e-19	up
MS.gene027416	6.13389	1.11969e-18	up
MS.gene33104	2.85447	2.00285e-18	up
MS.gene45242	4.82744	2.05046e-18	up
MS.gene036301	2.74969	3.36939e-18	up
MS.gene49902	6.74686	4.76151e-18	up
MS.gene54620	5.47999	1.83163e-17	up
MS.gene49083	10.9864	2.66173e-17	up
MS.gene067857	4.54895	2.93744e-17	up
MS.gene016104	2.64039	3.86595e-17	up
MS.gene017380	4.73369	6.02072e-17	up
MS.gene049374	5.91012	6.51579e-17	up
MS.gene56967	6.05067	7.39232e-17	up
MS.gene057532	4.41323	9.42014e-17	up
MS.gene08059	6.50398	1.32725e-16	up
MS.gene006300	7.81835	1.37739e-16	up
MS.gene064146	7.70152	1.48395e-16	up
MS.gene87756	8.35483	1.51906e-16	up
MS.gene02222	4.5947	2.20169e-16	up
MS.gene08165	4.83823	2.20169e-16	up
MS.gene58531	3.07319	2.92005e-16	up
MS.gene058490	6.7533	3.96266e-16	up
MS.gene008799	6.07775	4.50495e-16	up
MS.gene85097	4.22077	4.62319e-16	up
MS.gene62238	5.24535	4.69694e-16	up
MS.gene013956	2.44455	4.69694e-16	up
MS.gene022850	7.45109	5.82632e-16	up
MS.gene77442	2.11687	6.06606e-16	up
MS.gene051480	4.94675	6.64522e-16	up
MS.gene82799	5.66861	7.67258e-16	up
MS.gene051498	2.40669	7.93805e-16	up
MS.gene87050	8.75869	8.08359e-16	up
MS.gene62237	6.64827	1.23176e-15	up
MS.gene058470	2.62212	1.5285e-15	up
MS.gene95545	6.15901	2.64428e-15	up
MS.gene86824	5.20752	2.65964e-15	up
MS.gene04388	8.1739	3.18311e-15	up
MS.gene05474	6.26453	4.07264e-15	up
MS.gene06995	4.31763	4.32159e-15	up
MS.gene023779	6.47304	4.66524e-15	up
MS.gene047338	5.49517	4.96757e-15	up
MS.gene005657	5.2689	5.16066e-15	up
MS.gene98856	5.81919	5.57133e-15	up
MS.gene44044	3.08858	6.86135e-15	up
MS.gene28555	9.88698	1.07519e-14	up
MS.gene41775	4.29079	1.09482e-14	up
MS.gene25604	2.77717	1.10937e-14	up
MS.gene011869	8.79521	1.44243e-14	up
MS.gene042699	5.97733	1.69558e-14	up
MS.gene028178	6.95434	1.85782e-14	up
MS.gene063881	6.39047	1.92469e-14	up
MS.gene008149	3.58087	1.92469e-14	up
MS.gene017772	2.54248	2.06532e-14	up
MS.gene014391	5.76285	2.40522e-14	up
MS.gene055752	7.3532	3.4142e-14	up
MS.gene013159	5.27371	3.75354e-14	up
MS.gene031502	3.9199	4.12406e-14	up
MS.gene63983	5.27516	5.67085e-14	up
MS.gene06857	7.16647	5.69003e-14	up
MS.gene008206	6.42326	7.09748e-14	up
MS.gene45091	4.2748	8.23138e-14	up
MS.gene051295	13.2317	8.23138e-14	up
MS.gene58367	3.8893	8.40759e-14	up
MS.gene34241	2.42974	8.62352e-14	up
MS.gene04366	2.57345	1.37025e-13	up
MS.gene031385	8.13441	1.42013e-13	up
MS.gene069970	4.09839	1.45374e-13	up
MS.gene055155	7.57354	1.54588e-13	up
MS.gene030980	9.26756	1.5822e-13	up
MS.gene42086	7.24619	1.61881e-13	up
MS.gene043401	4.41317	2.4819e-13	up
MS.gene32520	2.01385	3.54432e-13	up
MS.gene08345	6.72151	4.77531e-13	up
MS.gene28706	11.964	4.99267e-13	up
MS.gene36035	2.60839	5.25129e-13	up
MS.gene014016	3.17944	5.95062e-13	up
MS.gene007909	2.75467	5.97294e-13	up
MS.gene63494	3.47656	5.97761e-13	up
MS.gene50135	2.25531	7.88886e-13	up
MS.gene82350	2.97569	8.19247e-13	up
MS.gene055836	3.63944	9.79687e-13	up
MS.gene73320	13.2976	9.86184e-13	up
MS.gene044066	5.19891	1.07251e-12	up
MS.gene021101	6.12923	1.0962e-12	up
MS.gene87852	6.01947	1.11948e-12	up
MS.gene84207	4.57865	1.23431e-12	up
MS.gene025828	3.29507	1.25272e-12	up
MS.gene048489	8.33257	1.68654e-12	up
MS.gene43675	4.73688	1.83922e-12	up
MS.gene39996	3.51103	2.0799e-12	up
MS.gene072780	2.28426	2.09255e-12	up
MS.gene72150	3.00691	2.32225e-12	up
MS.gene030356	3.59679	2.32253e-12	up
MS.gene90659	2.4305	2.57617e-12	up
MS.gene065170	7.12518	2.65664e-12	up
MS.gene43907	4.34824	2.65664e-12	up
MS.gene63297	3.56339	2.65664e-12	up
MS.gene31524	7.28333	2.89647e-12	up
MS.gene004812	8.47967	3.22605e-12	up
MS.gene070443	3.7995	3.91733e-12	up
MS.gene68627	9.78821	5.41964e-12	up
MS.gene28295	2.91514	5.55384e-12	up
MS.gene028666	5.1525	6.02972e-12	up
MS.gene06099	4.60264	6.48747e-12	up
MS.gene051771	4.7961	6.87913e-12	up
MS.gene49786	3.33689	8.2425e-12	up
MS.gene043017	3.61574	9.57751e-12	up
MS.gene28392	14.1309	1.00782e-11	up
MS.gene87340	9.50171	1.11321e-11	up
MS.gene061973	3.24948	1.15681e-11	up
MS.gene045031	6.18709	1.20591e-11	up
MS.gene067815	4.74091	1.31738e-11	up
MS.gene072327	2.19795	1.52647e-11	up
MS.gene51065	5.30907	1.54237e-11	up
MS.gene90077	2.24603	1.73998e-11	up
MS.gene063288	5.35349	1.81771e-11	up
MS.gene059867	6.89263	1.89326e-11	up
MS.gene24470	3.8088	1.91172e-11	up
MS.gene074163	2.1775	2.20613e-11	up
MS.gene004053	5.90872	2.24851e-11	up
MS.gene78744	5.32556	2.25376e-11	up
MS.gene23807	3.22597	2.29074e-11	up
MS.gene09712	5.7591	2.6334e-11	up
MS.gene024093	7.5897	2.8729e-11	up
MS.gene042464	4.14477	2.8729e-11	up
MS.gene60650	7.53022	2.99847e-11	up
MS.gene052278	2.87594	3.24188e-11	up
MS.gene030158	7.35005	3.40615e-11	up
MS.gene81112	2.45752	3.50173e-11	up
MS.gene046028	4.67449	3.53481e-11	up
MS.gene05726	8.36027	3.58806e-11	up
MS.gene037580	13.108	3.92541e-11	up
MS.gene83687	5.92776	4.23858e-11	up
MS.gene044334	2.37448	4.36942e-11	up
MS.gene71307	2.56764	4.45856e-11	up
MS.gene025902	5.7941	4.64335e-11	up
MS.gene49182	7.66157	5.3898e-11	up
MS.gene073187	5.28146	5.55115e-11	up
MS.gene42800	6.5458	7.38208e-11	up
MS.gene017979	3.1359	7.66163e-11	up
MS.gene057622	4.91292	7.87528e-11	up
MS.gene87963	3.0239	7.87528e-11	up
MS.gene059618	2.30834	9.01546e-11	up
MS.gene009991	5.4611	9.13274e-11	up
MS.gene25197	6.26865	9.75939e-11	up
MS.gene55822	4.2273	1.05291e-10	up
MS.gene81108	8.36001	1.0915e-10	up
MS.gene56926	8.3188	1.0915e-10	up
MS.gene52813	6.40863	1.0915e-10	up
MS.gene91617	5.98711	1.0915e-10	up
MS.gene022556	3.61523	1.09211e-10	up
MS.gene09765	3.41725	1.09712e-10	up
MS.gene28707	13.8654	1.202e-10	up
MS.gene35664	3.21537	1.21937e-10	up
MS.gene012576	2.95814	1.30863e-10	up
MS.gene074113	11.2558	1.31397e-10	up
MS.gene57441	4.05779	1.32785e-10	up
MS.gene021682	4.21105	1.38814e-10	up
MS.gene20870	7.22391	1.42508e-10	up
MS.gene022955	11.7637	1.4795e-10	up
MS.gene033344	13.5156	1.4795e-10	up
MS.gene43088	2.26616	1.48276e-10	up
MS.gene006788	3.9948	1.69966e-10	up
MS.gene34233	2.55364	1.69966e-10	up
MS.gene037163	4.17873	2.16236e-10	up
MS.gene81687	5.72342	2.16379e-10	up
MS.gene072771	2.35465	2.30407e-10	up
MS.gene033536	7.9826	2.3508e-10	up
MS.gene83079	5.83268	2.37163e-10	up
MS.gene80329	5.69935	2.471e-10	up
MS.gene062158	5.7089	2.50734e-10	up
MS.gene22962	3.70521	2.5132e-10	up
MS.gene27226	3.33458	2.53306e-10	up
MS.gene069381	7.02066	2.56678e-10	up
MS.gene25695	2.4686	2.59716e-10	up
MS.gene49627	4.38036	2.64361e-10	up
MS.gene82727	4.31504	2.64361e-10	up
MS.gene039276	4.83928	2.81901e-10	up
MS.gene92165	3.70969	2.93175e-10	up
MS.gene97976	5.65735	3.0011e-10	up
MS.gene046792	6.49264	3.038e-10	up
MS.gene83848	4.9284	3.84436e-10	up
MS.gene49700	4.06066	4.18208e-10	up
MS.gene20485	7.41766	4.20793e-10	up
MS.gene053931	5.10056	4.34667e-10	up
MS.gene74444	5.29109	4.8997e-10	up
MS.gene41185	5.21554	5.15201e-10	up
MS.gene97913	7.97336	5.15201e-10	up
MS.gene019864	3.73146	5.35131e-10	up
MS.gene37986	2.48014	5.38151e-10	up
MS.gene059777	10.9322	5.40109e-10	up
MS.gene022010	2.25837	5.79287e-10	up
MS.gene49575	5.72076	5.94934e-10	up
MS.gene065692	2.47679	6.08773e-10	up
MS.gene062548	2.4091	6.16477e-10	up
MS.gene039109	8.27326	6.45642e-10	up
MS.gene39950	2.41763	6.84671e-10	up
MS.gene79901	2.02641	6.89213e-10	up
MS.gene77513	3.72254	7.66147e-10	up
MS.gene70125	11.6659	7.79725e-10	up
MS.gene40443	3.22995	7.82814e-10	up
MS.gene36456	12.3308	8.09257e-10	up
MS.gene006156	2.22738	8.41972e-10	up
MS.gene032266	2.41584	9.42897e-10	up
MS.gene000707	2.58643	1.00116e-09	up
MS.gene59361	11.2083	1.01197e-09	up
MS.gene65673	3.18755	1.01197e-09	up
MS.gene009824	6.67345	1.03485e-09	up
MS.gene41623	6.47299	1.0592e-09	up
MS.gene066512	3.0311	1.10857e-09	up
MS.gene025244	3.45819	1.13214e-09	up
MS.gene03964	6.64708	1.14373e-09	up
MS.gene002390	2.2891	1.15933e-09	up
MS.gene47145	4.99456	1.18884e-09	up
MS.gene62184	3.45358	1.24892e-09	up
MS.gene20217	4.74932	1.42379e-09	up
MS.gene92539	8.69223	1.4346e-09	up
MS.gene017519	3.09155	1.58651e-09	up
MS.gene36046	2.26297	1.62195e-09	up
MS.gene073428	4.32187	1.70881e-09	up
MS.gene025714	3.44296	1.86755e-09	up
MS.gene98962	5.75218	1.87724e-09	up
MS.gene003934	3.0418	1.87724e-09	up
MS.gene062159	7.71434	1.98903e-09	up
MS.gene20354	5.23845	2.20823e-09	up
MS.gene045100	3.56779	2.20823e-09	up
MS.gene039816	2.02062	2.22991e-09	up
MS.gene021902	5.32922	2.2477e-09	up
MS.gene43456	3.34575	2.2477e-09	up
MS.gene045964	5.06365	2.26531e-09	up
MS.gene44950	7.55552	2.26775e-09	up
MS.gene004373	5.86224	2.26834e-09	up
MS.gene77183	8.38629	2.30636e-09	up
MS.gene023273	5.55256	2.32094e-09	up
MS.gene03749	2.88547	2.34172e-09	up
MS.gene003028	2.39202	2.36695e-09	up
MS.gene066504	3.2127	2.50475e-09	up
MS.gene68072	2.12292	2.56601e-09	up
MS.gene93064	4.60316	2.60015e-09	up
MS.gene26726	9.34868	2.65565e-09	up
MS.gene036952	2.14888	2.68751e-09	up
MS.gene57008	5.81842	2.88244e-09	up
MS.gene062739	11.6443	3.0004e-09	up
MS.gene043840	2.40868	3.05999e-09	up
MS.gene40970	6.76048	3.2257e-09	up
MS.gene91301	4.81281	3.55439e-09	up
MS.gene21669	4.20149	3.66023e-09	up
MS.gene43149	6.67747	3.93881e-09	up
MS.gene98521	5.90106	3.95947e-09	up
MS.gene03000	3.87702	4.00017e-09	up
MS.gene053648	7.55937	4.33521e-09	up
MS.gene61993	3.14102	4.48373e-09	up
MS.gene063262	3.65563	4.53268e-09	up
MS.gene58653	3.88776	4.56267e-09	up
MS.gene92308	2.24961	4.63908e-09	up
MS.gene049951	5.27901	4.69589e-09	up
MS.gene013728	8.71622	4.76789e-09	up
MS.gene55504	5.21222	4.80747e-09	up
MS.gene041698	3.16258	5.12558e-09	up
MS.gene050334	7.14777	5.59536e-09	up
MS.gene01243	5.78241	5.62217e-09	up
MS.gene017914	6.50288	5.65474e-09	up
MS.gene50543	2.64355	5.8705e-09	up
MS.gene019411	6.27327	6.06654e-09	up
MS.gene21522	6.03176	6.33569e-09	up
MS.gene30772	2.7538	6.78114e-09	up
MS.gene24924	3.91716	7.21327e-09	up
MS.gene72748	6.12703	7.49883e-09	up
MS.gene066164	6.94406	7.55712e-09	up
MS.gene008800	5.16118	7.55712e-09	up
MS.gene069657	3.4177	7.62052e-09	up
MS.gene068711	2.38515	7.66286e-09	up
MS.gene01457	3.51013	8.06829e-09	up
MS.gene028335	13.0369	8.13494e-09	up
MS.gene44139	4.08302	8.22893e-09	up
MS.gene067916	6.09751	8.22893e-09	up
MS.gene072509	5.66863	8.91972e-09	up
MS.gene43593	6.65535	9.08224e-09	up
MS.gene013713	12.4309	9.10004e-09	up
MS.gene40833	4.15861	9.91634e-09	up
MS.gene001802	4.26773	1.06392e-08	up
MS.gene54187	5.97675	1.06548e-08	up
MS.gene003570	7.92925	1.09111e-08	up
MS.gene002377	5.93209	1.1129e-08	up
MS.gene40255	6.4831	1.13546e-08	up
MS.gene92571	3.49528	1.17606e-08	up
MS.gene21501	2.92684	1.25226e-08	up
MS.gene38041	5.84496	1.31117e-08	up
MS.gene92170	4.67577	1.31629e-08	up
MS.gene049999	7.14579	1.35606e-08	up
MS.gene37519	4.88076	1.36196e-08	up
MS.gene70469	2.37439	1.42112e-08	up
MS.gene43994	7.4144	1.42339e-08	up
MS.gene046071	7.72455	1.42339e-08	up
MS.gene32842	10.8093	1.44572e-08	up
MS.gene057464	9.96386	1.477e-08	up
MS.gene039128	5.26002	1.49831e-08	up
MS.gene061948	2.908	1.52434e-08	up
MS.gene31379	4.65655	1.54088e-08	up
MS.gene95744	5.18299	1.54115e-08	up
MS.gene55100	4.5274	1.57509e-08	up
MS.gene023030	2.28242	1.63295e-08	up
MS.gene37281	4.8108	1.64577e-08	up
MS.gene032215	3.38007	1.71052e-08	up
MS.gene032748	4.27422	1.77532e-08	up
MS.gene064881	4.14394	1.77532e-08	up
MS.gene025938	2.86106	1.77532e-08	up
MS.gene82352	7.00048	1.79814e-08	up
MS.gene047572	2.82128	1.81154e-08	up
MS.gene37450	10.3574	2.07825e-08	up
MS.gene27364	10.5317	2.12125e-08	up
MS.gene75424	5.62945	2.14387e-08	up
MS.gene010091	3.60559	2.17612e-08	up
MS.gene048954	4.45996	2.19145e-08	up
MS.gene052318	4.11484	2.2932e-08	up
MS.gene023029	2.19392	2.34691e-08	up
MS.gene070646	5.70863	2.4049e-08	up
MS.gene71681	2.42082	2.44598e-08	up
MS.gene035798	2.82586	2.50226e-08	up
MS.gene007342	5.26088	2.53793e-08	up
MS.gene033366	4.84055	2.66625e-08	up
MS.gene044273	3.38754	2.72634e-08	up
MS.gene011162	5.31555	2.72634e-08	up
MS.gene68722	7.12433	2.75652e-08	up
MS.gene33644	4.26444	2.80155e-08	up
MS.gene025821	3.7163	2.80155e-08	up
MS.gene068250	3.8824	3.11567e-08	up
MS.gene030525	11.1821	3.11567e-08	up
MS.gene027087	4.2474	3.30769e-08	up
MS.gene039155	3.45688	3.35605e-08	up
MS.gene005841	2.51745	3.39058e-08	up
MS.gene85641	2.68155	3.39665e-08	up
MS.gene64463	3.80906	3.48733e-08	up
MS.gene47126	4.83759	3.52293e-08	up
MS.gene015249	2.05991	3.55055e-08	up
MS.gene44626	5.40497	3.68121e-08	up
MS.gene052907	8.5961	3.70551e-08	up
MS.gene004787	6.26151	3.70749e-08	up
MS.gene47714	2.83423	3.71332e-08	up
MS.gene023119	6.58308	3.81621e-08	up
MS.gene71622	4.90725	3.82449e-08	up
MS.gene99928	4.2542	3.98106e-08	up
MS.gene29980	6.34535	3.98184e-08	up
MS.gene072602	3.35156	4.06577e-08	up
MS.gene007572	12.5206	4.22512e-08	up
MS.gene007864	8.39144	4.26964e-08	up
MS.gene86036	6.22379	4.29751e-08	up
MS.gene45818	6.02866	4.3008e-08	up
MS.gene94151	6.2185	4.36419e-08	up
MS.gene58527	5.05795	4.39595e-08	up
MS.gene000055	3.77754	4.41393e-08	up
MS.gene82406	2.56648	4.48625e-08	up
MS.gene074092	5.50911	4.83823e-08	up
MS.gene015512	5.87381	4.90452e-08	up
MS.gene56724	3.5483	5.04925e-08	up
MS.gene81918	9.46196	5.14204e-08	up
MS.gene88785	3.68941	5.16633e-08	up
MS.gene03712	4.32941	5.18357e-08	up
MS.gene82222	4.90608	5.2382e-08	up
MS.gene66451	2.78692	5.32047e-08	up
MS.gene020797	11.1873	5.32979e-08	up
MS.gene070436	3.42737	5.34165e-08	up
MS.gene97222	6.48094	5.36068e-08	up
MS.gene49383	2.36807	5.36508e-08	up
MS.gene81689	5.29316	5.37479e-08	up
MS.gene049749	2.1969	5.51381e-08	up
MS.gene04617	2.89989	5.58273e-08	up
MS.gene56558	8.24413	5.67008e-08	up
MS.gene060978	5.35616	5.69567e-08	up
MS.gene78446	2.76541	5.69567e-08	up
MS.gene76038	4.42614	6.0163e-08	up
MS.gene72696	5.20709	6.19392e-08	up
MS.gene40366	3.37122	6.19392e-08	up
MS.gene49263	4.79376	6.3807e-08	up
MS.gene38702	14.9134	6.52506e-08	up
MS.gene049757	4.17153	6.55754e-08	up
MS.gene56725	5.6903	6.72009e-08	up
MS.gene066730	2.44247	6.7711e-08	up
MS.gene023607	2.52455	6.78168e-08	up
MS.gene23001	2.82827	6.78168e-08	up
MS.gene033170	4.29331	6.84249e-08	up
MS.gene99638	4.97086	6.94161e-08	up
MS.gene006767	7.00319	7.55088e-08	up
MS.gene00378	3.68503	7.56559e-08	up
MS.gene27188	2.76811	7.59116e-08	up
MS.gene97973	5.14463	8.06159e-08	up
MS.gene31493	4.00899	8.08665e-08	up
MS.gene51892	3.2231	8.16363e-08	up
MS.gene035580	3.25007	8.34517e-08	up
MS.gene55478	9.40755	8.36033e-08	up
MS.gene36031	4.38284	8.65877e-08	up
MS.gene063073	6.88142	8.65877e-08	up
MS.gene006601	4.05312	8.84709e-08	up
MS.gene042904	4.22049	8.90174e-08	up
MS.gene60227	6.48639	9.04105e-08	up
MS.gene73134	3.35129	9.44838e-08	up
MS.gene72620	4.30771	9.44838e-08	up
MS.gene053335	3.23262	9.46809e-08	up
MS.gene88405	6.06335	9.46809e-08	up
MS.gene057392	3.6346	9.56872e-08	up
MS.gene07326	3.03237	9.65634e-08	up
MS.gene85095	3.37828	9.65829e-08	up
MS.gene073170	11.0127	9.69145e-08	up
MS.gene89509	7.00087	9.85411e-08	up
MS.gene062758	3.99503	1.01423e-07	up
MS.gene27315	4.79986	1.01423e-07	up
MS.gene005127	7.31963	1.03584e-07	up
MS.gene33781	2.41851	1.04933e-07	up
MS.gene063416	3.53655	1.06821e-07	up
MS.gene043843	6.77976	1.06821e-07	up
MS.gene009861	6.46658	1.06924e-07	up
MS.gene81683	3.56592	1.07043e-07	up
MS.gene93983	5.23054	1.08151e-07	up
MS.gene56097	3.2572	1.08512e-07	up
MS.gene04618	9.92882	1.09555e-07	up
MS.gene43935	8.28828	1.10221e-07	up
MS.gene35123	11.7841	1.17891e-07	up
MS.gene28072	3.63381	1.21959e-07	up
MS.gene024690	3.04203	1.22732e-07	up
MS.gene31862	3.87716	1.23538e-07	up
MS.gene074108	4.38335	1.2954e-07	up
MS.gene001512	5.89096	1.36424e-07	up
MS.gene28587	6.39543	1.42472e-07	up
MS.gene83627	3.82735	1.42699e-07	up
MS.gene23619	4.21863	1.44062e-07	up
MS.gene40705	6.4872	1.44062e-07	up
MS.gene073543	3.28796	1.47621e-07	up
MS.gene57384	10.5351	1.50375e-07	up
MS.gene033231	9.95949	1.50375e-07	up
MS.gene032661	3.93818	1.50608e-07	up
MS.gene006242	2.00649	1.53839e-07	up
MS.gene27372	2.98848	1.57498e-07	up
MS.gene36598	5.39755	1.58958e-07	up
MS.gene035612	11.0361	1.61673e-07	up
MS.gene67191	6.02985	1.63758e-07	up
MS.gene20731	7.01112	1.65532e-07	up
MS.gene050800	3.76649	1.68175e-07	up
MS.gene50190	6.16208	1.69705e-07	up
MS.gene034132	5.2634	1.70722e-07	up
MS.gene020878	6.26124	1.72649e-07	up
MS.gene73404	4.1153	1.72913e-07	up
MS.gene24127	5.11063	1.72913e-07	up
MS.gene38363	12.1473	1.73365e-07	up
MS.gene067787	3.24751	1.73365e-07	up
MS.gene065567	3.22918	1.73408e-07	up
MS.gene039275	4.0124	1.778e-07	up
MS.gene25765	3.21964	1.78643e-07	up
MS.gene012447	5.86129	1.88674e-07	up
MS.gene069420	5.56738	1.88674e-07	up
MS.gene033850	5.75826	1.9021e-07	up
MS.gene033267	3.31811	1.94008e-07	up
MS.gene068423	11.1366	1.95492e-07	up
MS.gene60696	6.31074	1.98445e-07	up
MS.gene94259	6.36768	2.03763e-07	up
MS.gene008205	4.77193	2.07603e-07	up
MS.gene70188	4.0386	2.07603e-07	up
MS.gene30551	11.905	2.09463e-07	up
MS.gene77333	4.78255	2.09662e-07	up
MS.gene45815	7.09362	2.13384e-07	up
MS.gene01777	2.37558	2.15398e-07	up
MS.gene47109	6.75832	2.17013e-07	up
MS.gene08300	5.41758	2.17734e-07	up
MS.gene55469	7.28014	2.20936e-07	up
MS.gene025738	5.2344	2.28915e-07	up
MS.gene59428	4.46571	2.33532e-07	up
MS.gene036341	3.81625	2.3646e-07	up
MS.gene77666	6.01402	2.45849e-07	up
MS.gene027888	2.3686	2.45849e-07	up
MS.gene061135	2.09563	2.45849e-07	up
MS.gene070437	2.99232	2.45849e-07	up
MS.gene073222	3.72426	2.45849e-07	up
MS.gene89331	3.10048	2.45849e-07	up
MS.gene66983	3.09662	2.45849e-07	up
MS.gene006163	4.19376	2.46221e-07	up
MS.gene066241	7.0935	2.5465e-07	up
MS.gene011326	5.60938	2.5577e-07	up
MS.gene82451	5.07883	2.56822e-07	up
MS.gene97957	2.09244	2.5842e-07	up
MS.gene025171	3.64317	2.67573e-07	up
MS.gene24141	5.52768	2.7791e-07	up
MS.gene048128	6.36982	2.79243e-07	up
MS.gene72142	2.42441	2.81288e-07	up
MS.gene045131	2.24614	2.85297e-07	up
MS.gene77577	11.5953	2.87618e-07	up
MS.gene039133	5.84749	2.87643e-07	up
MS.gene042072	3.16318	2.95749e-07	up
MS.gene004680	3.26162	2.95787e-07	up
MS.gene063263	4.49548	3.0823e-07	up
MS.gene41709	3.59037	3.16124e-07	up
MS.gene034956	10.7197	3.17493e-07	up
MS.gene22447	3.24675	3.19146e-07	up
MS.gene006830	2.34769	3.25123e-07	up
MS.gene91428	3.36185	3.49686e-07	up
MS.gene014609	5.09837	3.52345e-07	up
MS.gene98858	5.22328	3.55212e-07	up
MS.gene073486	3.55307	3.57697e-07	up
MS.gene70672	6.18767	3.7619e-07	up
MS.gene93475	9.96298	3.8401e-07	up
MS.gene48260	6.447	3.8607e-07	up
MS.gene22583	7.08097	3.91966e-07	up
MS.gene035452	2.54088	4.01646e-07	up
MS.gene012487	2.25612	4.133e-07	up
MS.gene41186	4.68568	4.30366e-07	up
MS.gene059192	5.86103	4.30366e-07	up
MS.gene29341	4.56268	4.30921e-07	up
MS.gene69750	3.13126	4.36459e-07	up
MS.gene039840	5.35131	4.43762e-07	up
MS.gene041629	6.08607	4.44994e-07	up
MS.gene043288	3.63587	4.60524e-07	up
MS.gene005624	3.73677	4.78695e-07	up
MS.gene063556	4.00738	4.78793e-07	up
MS.gene047526	3.15781	4.79984e-07	up
MS.gene063260	3.54155	4.81366e-07	up
MS.gene92036	2.55877	4.81714e-07	up
MS.gene070080	4.77342	4.83119e-07	up
MS.gene63964	3.53938	4.83416e-07	up
MS.gene72673	3.25825	4.8522e-07	up
MS.gene026783	5.03875	4.86231e-07	up
MS.gene64823	3.39219	4.93587e-07	up
MS.gene007749	4.15105	4.93587e-07	up
MS.gene09590	2.29938	4.93612e-07	up
MS.gene007372	11.2559	5.03573e-07	up
MS.gene91640	9.38532	5.09439e-07	up
MS.gene79545	4.97694	5.16323e-07	up
MS.gene073446	2.69791	5.18572e-07	up
MS.gene005177	2.13534	5.22496e-07	up
MS.gene004054	4.01964	5.25864e-07	up
MS.gene27587	4.70003	5.26814e-07	up
MS.gene049653	2.44566	5.27477e-07	up
MS.gene89687	3.34468	5.30856e-07	up
MS.gene002562	6.53199	5.39917e-07	up
MS.gene44909	5.44286	5.42484e-07	up
MS.gene027345	6.53667	5.48806e-07	up
MS.gene031090	6.64928	5.62884e-07	up
MS.gene93045	4.44271	5.68629e-07	up
MS.gene005502	5.14763	5.69764e-07	up
MS.gene63161	3.08449	5.8082e-07	up
MS.gene036699	4.24985	6.04524e-07	up
MS.gene02143	3.34203	6.06525e-07	up
MS.gene010104	6.65366	6.13844e-07	up
MS.gene037835	2.9575	6.17034e-07	up
MS.gene026671	9.75773	6.17268e-07	up
MS.gene001826	4.98983	6.18447e-07	up
MS.gene22342	9.51939	6.18629e-07	up
MS.gene82978	3.03707	6.25397e-07	up
MS.gene33379	4.13422	6.26215e-07	up
MS.gene057690	3.33493	6.27584e-07	up
MS.gene38703	4.33706	6.32018e-07	up
MS.gene011051	7.11331	6.42794e-07	up
MS.gene90448	4.2246	6.43486e-07	up
MS.gene48271	10.1299	6.44012e-07	up
MS.gene95682	3.86949	6.45239e-07	up
MS.gene67242	6.53585	6.4554e-07	up
MS.gene048332	4.64141	6.46551e-07	up
MS.gene88914	7.16031	6.48717e-07	up
MS.gene40000	7.45676	6.50556e-07	up
MS.gene044078	2.40386	6.55683e-07	up
MS.gene84478	4.23498	6.55896e-07	up
MS.gene59187	10.5126	6.7135e-07	up
MS.gene49358	2.78362	6.7492e-07	up
MS.gene63628	3.33704	6.82388e-07	up
MS.gene31199	4.30052	6.87511e-07	up
MS.gene59184	7.62941	6.9271e-07	up
MS.gene035633	2.24795	6.93216e-07	up
MS.gene07136	3.11967	6.93216e-07	up
MS.gene76714	6.02419	6.9653e-07	up
MS.gene061514	4.002	7.09172e-07	up
MS.gene073704	5.64563	7.0936e-07	up
MS.gene026541	4.98954	7.10085e-07	up
MS.gene57938	4.61121	7.11349e-07	up
MS.gene66840	4.06515	7.18608e-07	up
MS.gene41379	4.07624	7.21471e-07	up
MS.gene43836	4.44007	7.25479e-07	up
MS.gene063742	6.87858	7.34143e-07	up
MS.gene031779	9.81211	7.38085e-07	up
MS.gene87209	5.58909	7.74839e-07	up
MS.gene068725	5.41518	7.75562e-07	up
MS.gene049693	2.81978	7.80378e-07	up
MS.gene95723	3.35954	7.86554e-07	up
MS.gene45816	6.03487	7.89264e-07	up
MS.gene91812	2.85569	7.89264e-07	up
MS.gene007146	8.17762	7.98871e-07	up
MS.gene030773	3.88814	8.33064e-07	up
MS.gene60356	6.94988	8.36786e-07	up
MS.gene69677	2.79053	8.37102e-07	up
MS.gene041920	4.28067	8.37646e-07	up
MS.gene31234	5.18049	8.70589e-07	up
MS.gene08932	2.23542	8.70791e-07	up
MS.gene39442	2.36463	9.00558e-07	up
MS.gene76556	2.17517	9.01658e-07	up
MS.gene76814	4.28006	9.04989e-07	up
MS.gene74455	5.90962	9.14627e-07	up
MS.gene70525	3.08606	9.35637e-07	up
MS.gene22232	2.03501	9.44174e-07	up
MS.gene88781	3.85058	9.45742e-07	up
MS.gene045576	3.51549	9.46029e-07	up
MS.gene040499	2.6651	9.46735e-07	up
MS.gene56493	2.67934	9.53174e-07	up
MS.gene36628	5.35441	9.55582e-07	up
MS.gene23391	9.86731	9.57581e-07	up
MS.gene053083	4.18747	9.57581e-07	up
MS.gene01056	3.14551	9.74687e-07	up
MS.gene019589	3.71167	9.776e-07	up
MS.gene80641	3.17341	9.78258e-07	up
MS.gene073956	3.34965	9.95428e-07	up
MS.gene79579	9.03696	1.02382e-06	up
MS.gene57468	2.93586	1.02402e-06	up
MS.gene33802	10.7134	1.02845e-06	up
MS.gene31644	4.13415	1.05134e-06	up
MS.gene068974	17.553	1.06246e-06	up
MS.gene073189	2.16973	1.06926e-06	up
MS.gene016658	2.65457	1.06926e-06	up
MS.gene65651	5.21796	1.09339e-06	up
MS.gene074124	6.62125	1.10746e-06	up
MS.gene32576	11.0922	1.19614e-06	up
MS.gene00463	4.41787	1.222e-06	up
MS.gene81685	3.51858	1.22732e-06	up
MS.gene78366	2.14836	1.22843e-06	up
MS.gene60088	4.21603	1.25192e-06	up
MS.gene53062	6.15817	1.25688e-06	up
MS.gene012839	9.07115	1.27112e-06	up
MS.gene98068	3.92109	1.28601e-06	up
MS.gene50189	3.0934	1.28601e-06	up
MS.gene063427	3.78101	1.30434e-06	up
MS.gene46055	3.77905	1.30664e-06	up
MS.gene036168	3.25772	1.30958e-06	up
MS.gene68298	9.24289	1.31324e-06	up
MS.gene51605	2.55889	1.32435e-06	up
MS.gene042303	9.59685	1.33576e-06	up
MS.gene011756	4.50342	1.33781e-06	up
MS.gene28105	3.60005	1.34139e-06	up
MS.gene48390	9.87916	1.36118e-06	up
MS.gene09137	4.0741	1.36625e-06	up
MS.gene93063	6.96222	1.37252e-06	up
MS.gene89665	9.77279	1.37252e-06	up
MS.gene45813	6.16705	1.38718e-06	up
MS.gene068088	2.05569	1.38718e-06	up
MS.gene049185	9.67698	1.38788e-06	up
MS.gene69371	6.0033	1.39751e-06	up
MS.gene34782	2.32756	1.40386e-06	up
MS.gene25192	5.73495	1.43473e-06	up
MS.gene36376	5.07398	1.44345e-06	up
MS.gene024362	10.5364	1.4741e-06	up
MS.gene003184	3.19418	1.47612e-06	up
MS.gene008693	5.91839	1.48292e-06	up
MS.gene07990	2.90597	1.48648e-06	up
MS.gene029521	5.53675	1.51053e-06	up
MS.gene35363	2.06848	1.52002e-06	up
MS.gene033150	3.36283	1.53263e-06	up
MS.gene063676	3.13197	1.53479e-06	up
MS.gene034782	3.0085	1.57744e-06	up
MS.gene43679	5.13675	1.58105e-06	up
MS.gene85441	3.59383	1.58581e-06	up
MS.gene45758	2.50535	1.59871e-06	up
MS.gene35270	3.52078	1.6631e-06	up
MS.gene051275	7.16478	1.68578e-06	up
MS.gene08200	5.07601	1.69916e-06	up
MS.gene56527	9.14372	1.70297e-06	up
MS.gene031689	3.4574	1.70325e-06	up
MS.gene24192	3.13281	1.70954e-06	up
MS.gene80742	8.07201	1.74997e-06	up
MS.gene70222	9.67222	1.75592e-06	up
MS.gene016932	2.78561	1.75836e-06	up
MS.gene47119	8.56418	1.78244e-06	up
MS.gene91947	4.84398	1.81606e-06	up
MS.gene73286	4.0855	1.82203e-06	up
MS.gene34196	10.9853	1.89439e-06	up
MS.gene49262	2.07371	1.93686e-06	up
MS.gene63051	2.96157	1.93976e-06	up
MS.gene032315	10.662	1.99604e-06	up
MS.gene059856	2.38327	1.99642e-06	up
MS.gene92101	8.84526	2.00489e-06	up
MS.gene35984	3.01135	2.02571e-06	up
MS.gene053055	5.16965	2.02571e-06	up
MS.gene69856	13.6963	2.04228e-06	up
MS.gene58862	10.7114	2.05933e-06	up
MS.gene21964	5.09033	2.05937e-06	up
MS.gene056505	2.08023	2.131e-06	up
MS.gene057208	7.06359	2.1885e-06	up
MS.gene008792	3.59549	2.18983e-06	up
MS.gene95742	3.59929	2.19002e-06	up
MS.gene22302	2.36658	2.24461e-06	up
MS.gene063021	3.52959	2.25235e-06	up
MS.gene003025	6.15692	2.26873e-06	up
MS.gene73672	3.11156	2.26959e-06	up
MS.gene020583	4.86692	2.27404e-06	up
MS.gene050758	4.74445	2.27775e-06	up
MS.gene041565	10.6392	2.27861e-06	up
MS.gene034337	2.26689	2.34934e-06	up
MS.gene73076	9.11121	2.35988e-06	up
MS.gene014890	4.08098	2.39788e-06	up
MS.gene052353	9.58041	2.39947e-06	up
MS.gene054105	3.2518	2.42666e-06	up
MS.gene022786	5.93283	2.44847e-06	up
MS.gene031882	5.18063	2.51996e-06	up
MS.gene95029	2.69847	2.54876e-06	up
MS.gene91571	3.82425	2.55105e-06	up
MS.gene003545	3.49161	2.56429e-06	up
MS.gene031707	3.74275	2.56653e-06	up
MS.gene93633	2.23889	2.57163e-06	up
MS.gene55256	5.68241	2.6075e-06	up
MS.gene023959	2.66883	2.60807e-06	up
MS.gene073527	6.1815	2.64459e-06	up
MS.gene92118	6.99077	2.64728e-06	up
MS.gene78437	4.31326	2.65009e-06	up
MS.gene050653	2.30576	2.67158e-06	up
MS.gene019804	2.06618	2.6952e-06	up
MS.gene99927	3.48531	2.69862e-06	up
MS.gene31525	2.6403	2.69895e-06	up
MS.gene009971	2.68788	2.69895e-06	up
MS.gene31794	3.94959	2.72801e-06	up
MS.gene056482	8.57168	2.76627e-06	up
MS.gene93004	2.2887	2.7916e-06	up
MS.gene031821	3.61026	2.86064e-06	up
MS.gene043392	3.09804	2.9021e-06	up
MS.gene022282	4.57373	2.95002e-06	up
MS.gene004235	6.57555	2.95963e-06	up
MS.gene008776	2.99534	2.95963e-06	up
MS.gene92946	4.75696	2.96316e-06	up
MS.gene24429	3.93186	2.96316e-06	up
MS.gene019531	3.35466	2.97152e-06	up
MS.gene76713	2.53302	2.99742e-06	up
MS.gene002485	3.07429	2.9989e-06	up
MS.gene056466	2.65472	3.00491e-06	up
MS.gene029589	2.27127	3.03334e-06	up
MS.gene066363	6.78467	3.04011e-06	up
MS.gene81623	5.49386	3.04239e-06	up
MS.gene79717	2.72571	3.05893e-06	up
MS.gene033166	2.3161	3.06953e-06	up
MS.gene47640	2.70691	3.0834e-06	up
MS.gene006739	2.11445	3.09623e-06	up
MS.gene00427	3.45035	3.13964e-06	up
MS.gene48521	5.22454	3.13964e-06	up
MS.gene66977	6.13638	3.15863e-06	up
MS.gene23594	9.31568	3.27673e-06	up
MS.gene029726	6.00754	3.29663e-06	up
MS.gene057694	2.43446	3.30712e-06	up
MS.gene073771	4.5632	3.33991e-06	up
MS.gene05869	7.65632	3.38417e-06	up
MS.gene046858	2.19377	3.38417e-06	up
MS.gene72851	2.77775	3.3845e-06	up
MS.gene46954	2.5424	3.42403e-06	up
MS.gene052416	3.1009	3.43993e-06	up
MS.gene015044	8.57871	3.48094e-06	up
MS.gene24440	2.29044	3.51989e-06	up
MS.gene22882	2.16534	3.51989e-06	up
MS.gene072632	2.83041	3.51989e-06	up
MS.gene22239	2.38366	3.54318e-06	up
MS.gene028582	2.11222	3.59139e-06	up
MS.gene65429	3.32793	3.64921e-06	up
MS.gene50738	2.89862	3.66506e-06	up
MS.gene02759	2.83857	3.69534e-06	up
MS.gene07109	5.722	3.73387e-06	up
MS.gene011370	2.1133	3.73396e-06	up
MS.gene21543	3.64048	3.7383e-06	up
MS.gene31966	5.50721	3.7383e-06	up
MS.gene053856	3.75885	3.75988e-06	up
MS.gene012118	8.70263	3.76958e-06	up
MS.gene055211	2.74967	3.81343e-06	up
MS.gene31311	8.95111	3.85101e-06	up
MS.gene034122	3.29418	3.92928e-06	up
MS.gene44893	3.75719	3.93556e-06	up
MS.gene49758	9.49023	3.96865e-06	up
MS.gene98236	2.23129	4.02758e-06	up
MS.gene006620	3.28795	4.03462e-06	up
MS.gene42638	2.48599	4.03628e-06	up
MS.gene027960	3.47789	4.07766e-06	up
MS.gene49697	6.21865	4.0844e-06	up
MS.gene073427	2.9299	4.08778e-06	up
MS.gene030624	8.98931	4.09317e-06	up
MS.gene60616	3.63236	4.09543e-06	up
MS.gene98697	9.4168	4.1143e-06	up
MS.gene004785	5.17173	4.11499e-06	up
MS.gene032280	3.53159	4.15936e-06	up
MS.gene040727	5.34617	4.27023e-06	up
MS.gene019134	2.60672	4.27023e-06	up
MS.gene22704	5.03612	4.27023e-06	up
MS.gene047330	8.81971	4.28041e-06	up
MS.gene90363	3.79763	4.29463e-06	up
MS.gene069574	2.42525	4.30558e-06	up
MS.gene54177	3.47965	4.3207e-06	up
MS.gene78901	4.03407	4.37535e-06	up
MS.gene97961	3.6526	4.42953e-06	up
MS.gene79719	3.46332	4.49645e-06	up
MS.gene37825	2.10156	4.5162e-06	up
MS.gene87819	4.97607	4.5162e-06	up
MS.gene032743	3.24953	4.54457e-06	up
MS.gene39194	2.74171	4.54977e-06	up
MS.gene032263	4.05895	4.58382e-06	up
MS.gene31785	7.15632	4.61084e-06	up
MS.gene072986	2.63452	4.64338e-06	up
MS.gene21633	8.76026	4.64943e-06	up
MS.gene37957	8.86151	4.67834e-06	up
MS.gene073345	2.35141	4.74229e-06	up
MS.gene28292	5.99601	4.81882e-06	up
MS.gene05718	2.11548	4.84842e-06	up
MS.gene70234	6.15677	4.87229e-06	up
MS.gene66533	2.12854	4.94149e-06	up
MS.gene27136	9.33447	4.96308e-06	up
MS.gene42146	10.1534	5.01074e-06	up
MS.gene050990	5.18313	5.06352e-06	up
MS.gene84094	7.16213	5.09879e-06	up
MS.gene026758	8.78054	5.18915e-06	up
MS.gene48988	3.04782	5.27997e-06	up
MS.gene79720	3.15079	5.34407e-06	up
MS.gene014754	2.10523	5.35534e-06	up
MS.gene072398	2.80112	5.36875e-06	up
MS.gene20536	3.01593	5.42218e-06	up
MS.gene94266	4.44671	5.42304e-06	up
MS.gene79226	4.34025	5.43493e-06	up
MS.gene09279	8.77744	5.5154e-06	up
MS.gene047510	5.46601	5.56218e-06	up
MS.gene008542	2.45627	5.64468e-06	up
MS.gene038444	4.42781	5.67119e-06	up
MS.gene51300	6.29959	5.72404e-06	up
MS.gene09310	2.47831	5.73209e-06	up
MS.gene010101	3.57863	5.76574e-06	up
MS.gene46972	2.56225	6.03388e-06	up
MS.gene039378	3.81883	6.05593e-06	up
MS.gene00747	5.71882	6.06674e-06	up
MS.gene65654	4.95353	6.0674e-06	up
MS.gene049774	2.09595	6.15345e-06	up
MS.gene38696	2.50019	6.15345e-06	up
MS.gene96781	7.30199	6.15345e-06	up
MS.gene060977	3.20108	6.29983e-06	up
MS.gene87478	4.21236	6.32364e-06	up
MS.gene031461	4.93874	6.33158e-06	up
MS.gene009084	2.60255	6.33438e-06	up
MS.gene56902	3.61648	6.35805e-06	up
MS.gene34910	4.82185	6.35805e-06	up
MS.gene007359	2.9615	6.35857e-06	up
MS.gene059051	3.01549	6.39614e-06	up
MS.gene83628	2.3261	6.43207e-06	up
MS.gene75239	4.7859	6.43765e-06	up
MS.gene34246	3.57755	6.43945e-06	up
MS.gene54859	4.21971	6.45926e-06	up
MS.gene30654	3.03652	6.45926e-06	up
MS.gene73450	3.37913	6.50632e-06	up
MS.gene028332	8.1502	6.50632e-06	up
MS.gene026118	4.27447	6.6458e-06	up
MS.gene64701	3.48726	6.67142e-06	up
MS.gene68069	5.51916	6.70603e-06	up
MS.gene072297	4.91939	6.71096e-06	up
MS.gene08779	2.7559	6.81885e-06	up
MS.gene012149	4.63711	6.91049e-06	up
MS.gene065302	9.46766	6.93541e-06	up
MS.gene025103	4.23238	6.94768e-06	up
MS.gene017049	5.30639	7.00747e-06	up
MS.gene95693	2.87043	7.00747e-06	up
MS.gene009882	3.58892	7.01252e-06	up
MS.gene036618	9.02966	7.02189e-06	up
MS.gene066772	5.51045	7.02422e-06	up
MS.gene61485	8.71646	7.02879e-06	up
MS.gene23321	3.14596	7.26463e-06	up
MS.gene62260	2.80985	7.26463e-06	up
MS.gene003677	4.76464	7.26463e-06	up
MS.gene051204	2.82579	7.27436e-06	up
MS.gene64245	3.17301	7.28889e-06	up
MS.gene003741	2.47719	7.2944e-06	up
MS.gene92141	2.77393	7.2944e-06	up
MS.gene57009	2.85435	7.30318e-06	up
MS.gene049377	3.458	7.31159e-06	up
MS.gene03359	3.32143	7.46175e-06	up
MS.gene023496	6.18404	7.51664e-06	up
MS.gene00423	4.81583	7.59827e-06	up
MS.gene70078	2.55734	7.60167e-06	up
MS.gene042538	3.82195	7.60167e-06	up
MS.gene59721	4.23024	7.62768e-06	up
MS.gene012593	2.09631	7.62768e-06	up
MS.gene40119	5.0676	7.65669e-06	up
MS.gene053825	2.99288	7.7539e-06	up
MS.gene57366	9.52527	7.8173e-06	up
MS.gene055897	2.19932	7.87643e-06	up
MS.gene032799	4.47766	7.92562e-06	up
MS.gene031462	3.79848	7.98983e-06	up
MS.gene45860	7.10311	8.02336e-06	up
MS.gene73557	6.15554	8.04033e-06	up
MS.gene29975	3.24578	8.07407e-06	up
MS.gene83605	4.03798	8.14059e-06	up
MS.gene001157	4.60784	8.14709e-06	up
MS.gene032626	4.89019	8.27445e-06	up
MS.gene062501	2.92867	8.27968e-06	up
MS.gene021197	8.84525	8.29895e-06	up
MS.gene60992	4.83496	8.34289e-06	up
MS.gene45820	10.0716	8.34305e-06	up
MS.gene006819	2.6092	8.37932e-06	up
MS.gene07197	5.83347	8.40819e-06	up
MS.gene41838	4.23735	8.49048e-06	up
MS.gene000959	2.98573	8.51677e-06	up
MS.gene90220	3.67247	8.53771e-06	up
MS.gene94155	2.17883	8.61903e-06	up
MS.gene016863	2.2381	8.61903e-06	up
MS.gene036196	3.25135	8.64997e-06	up
MS.gene85636	4.1119	8.6716e-06	up
MS.gene59221	3.54472	8.6934e-06	up
MS.gene56727	3.9938	8.71594e-06	up
MS.gene31491	2.9806	8.82072e-06	up
MS.gene035282	2.95356	8.82072e-06	up
MS.gene043160	3.59253	8.89045e-06	up
MS.gene82100	3.49155	8.90361e-06	up
MS.gene79229	3.70425	8.92566e-06	up
MS.gene051769	4.16421	8.9652e-06	up
MS.gene023034	6.35938	9.04001e-06	up
MS.gene029439	6.68675	9.11797e-06	up
MS.gene066406	2.21689	9.1546e-06	up
MS.gene067303	7.34338	9.20492e-06	up
MS.gene73871	2.16383	9.22267e-06	up
MS.gene002383	3.97526	9.25333e-06	up
MS.gene071802	4.11931	9.27076e-06	up
MS.gene09432	3.7725	9.33213e-06	up
MS.gene063023	2.89431	9.33927e-06	up
MS.gene071889	3.06427	9.39628e-06	up
MS.gene54188	2.85374	9.39628e-06	up
MS.gene011069	5.04837	9.47005e-06	up
MS.gene23067	4.46166	9.48762e-06	up
MS.gene34235	2.83383	9.54579e-06	up
MS.gene24725	7.25038	9.63542e-06	up
MS.gene002296	7.06932	9.65274e-06	up
MS.gene066386	2.91577	9.68703e-06	up
MS.gene070824	3.8139	9.71504e-06	up
MS.gene038289	8.13567	9.82592e-06	up
MS.gene008366	4.19207	9.83235e-06	up
MS.gene36783	4.45356	9.92067e-06	up
MS.gene021869	7.46444	9.97134e-06	up
MS.gene044359	2.08481	1.00664e-05	up
MS.gene015804	9.51099	1.0105e-05	up
MS.gene021102	4.8665	1.01244e-05	up
MS.gene025855	4.72791	1.01963e-05	up
MS.gene026075	3.85452	1.02845e-05	up
MS.gene010108	2.15978	1.02845e-05	up
MS.gene36707	10.1908	1.02845e-05	up
MS.gene68426	5.31764	1.04825e-05	up
MS.gene26654	2.61131	1.04845e-05	up
MS.gene51911	8.48119	1.05417e-05	up
MS.gene036195	2.19311	1.05565e-05	up
MS.gene036431	2.31297	1.05656e-05	up
MS.gene007339	4.55938	1.05656e-05	up
MS.gene043469	2.46786	1.0707e-05	up
MS.gene052954	3.94931	1.07206e-05	up
MS.gene007344	4.04634	1.07515e-05	up
MS.gene44643	3.83584	1.0765e-05	up
MS.gene065582	3.84283	1.08549e-05	up
MS.gene50352	2.56463	1.09103e-05	up
MS.gene008893	5.55087	1.10292e-05	up
MS.gene86911	4.80933	1.10989e-05	up
MS.gene033682	3.4141	1.11614e-05	up
MS.gene042080	5.35484	1.11736e-05	up
MS.gene69943	6.08847	1.13699e-05	up
MS.gene003351	2.40749	1.14819e-05	up
MS.gene006239	6.5083	1.15664e-05	up
MS.gene030564	2.66773	1.16629e-05	up
MS.gene013532	6.87943	1.17732e-05	up
MS.gene051399	5.44822	1.18465e-05	up
MS.gene072704	4.38393	1.18574e-05	up
MS.gene96026	2.75835	1.20573e-05	up
MS.gene59410	2.96387	1.21941e-05	up
MS.gene030587	4.3175	1.21941e-05	up
MS.gene84725	2.48471	1.22451e-05	up
MS.gene62014	4.62188	1.22618e-05	up
MS.gene020128	3.06309	1.23644e-05	up
MS.gene04899	9.09224	1.23989e-05	up
MS.gene03131	2.71879	1.24751e-05	up
MS.gene006481	3.66459	1.25384e-05	up
MS.gene048806	2.0016	1.25626e-05	up
MS.gene005986	6.05994	1.26083e-05	up
MS.gene46971	2.43712	1.26282e-05	up
MS.gene85785	2.73286	1.26821e-05	up
MS.gene033998	2.39882	1.28427e-05	up
MS.gene038277	3.78412	1.29111e-05	up
MS.gene31786	2.99589	1.29307e-05	up
MS.gene031395	2.50423	1.29584e-05	up
MS.gene35206	6.7965	1.31415e-05	up
MS.gene024593	2.7507	1.31448e-05	up
MS.gene001162	2.09169	1.33259e-05	up
MS.gene94150	6.06066	1.34783e-05	up
MS.gene82938	3.60382	1.35844e-05	up
MS.gene32098	3.66932	1.36763e-05	up
MS.gene005488	9.98185	1.36877e-05	up
MS.gene036282	2.86875	1.37481e-05	up
MS.gene030826	3.37532	1.38054e-05	up
MS.gene96906	2.79959	1.38273e-05	up
MS.gene28057	10.0539	1.38362e-05	up
MS.gene059048	2.59466	1.39184e-05	up
MS.gene56999	3.50255	1.39585e-05	up
MS.gene62786	2.06708	1.41031e-05	up
MS.gene75837	2.02439	1.41243e-05	up
MS.gene07333	7.26866	1.41243e-05	up
MS.gene029500	3.01023	1.41243e-05	up
MS.gene015806	5.6197	1.42579e-05	up
MS.gene48334	4.52385	1.42787e-05	up
MS.gene78449	2.54493	1.43213e-05	up
MS.gene045596	3.17798	1.43388e-05	up
MS.gene010203	6.29452	1.44509e-05	up
MS.gene85308	3.45928	1.44553e-05	up
MS.gene26449	3.43143	1.45968e-05	up
MS.gene35634	2.83028	1.47635e-05	up
MS.gene55243	4.53053	1.47858e-05	up
MS.gene44856	2.10494	1.4793e-05	up
MS.gene016270	2.23297	1.4793e-05	up
MS.gene059468	3.06715	1.50134e-05	up
MS.gene91081	2.9835	1.51243e-05	up
MS.gene30166	4.5381	1.52613e-05	up
MS.gene95985	3.66763	1.55354e-05	up
MS.gene78958	3.43048	1.56047e-05	up
MS.gene061729	2.9219	1.57216e-05	up
MS.gene64665	4.14777	1.57357e-05	up
MS.gene24464	3.32836	1.58107e-05	up
MS.gene57915	3.72365	1.58457e-05	up
MS.gene064784	6.88474	1.59757e-05	up
MS.gene63905	8.71475	1.60767e-05	up
MS.gene51034	4.53223	1.61195e-05	up
MS.gene035660	4.44102	1.62583e-05	up
MS.gene040057	7.58458	1.64319e-05	up
MS.gene017867	4.95197	1.65325e-05	up
MS.gene039269	4.52173	1.66726e-05	up
MS.gene049682	3.96695	1.67155e-05	up
MS.gene75463	3.70533	1.68287e-05	up
MS.gene060298	4.88653	1.68961e-05	up
MS.gene051762	2.94587	1.68966e-05	up
MS.gene96344	4.94131	1.69147e-05	up
MS.gene69945	7.84959	1.69703e-05	up
MS.gene37900	2.14197	1.70055e-05	up
MS.gene93916	3.13606	1.70055e-05	up
MS.gene72244	4.26057	1.70055e-05	up
MS.gene022918	4.04488	1.70246e-05	up
MS.gene32887	2.74673	1.70274e-05	up
MS.gene06643	8.67262	1.70274e-05	up
MS.gene64907	2.76698	1.71283e-05	up
MS.gene021445	4.10034	1.75078e-05	up
MS.gene42873	10.4448	1.75211e-05	up
MS.gene073220	4.32908	1.75221e-05	up
MS.gene06626	3.27555	1.75436e-05	up
MS.gene000054	3.33161	1.75667e-05	up
MS.gene047365	3.79388	1.77932e-05	up
MS.gene065752	6.63616	1.78326e-05	up
MS.gene011406	2.07098	1.78386e-05	up
MS.gene22220	2.90511	1.79157e-05	up
MS.gene39978	2.01698	1.80535e-05	up
MS.gene024650	8.93139	1.80535e-05	up
MS.gene66768	2.0184	1.80535e-05	up
MS.gene064556	2.89532	1.81652e-05	up
MS.gene09329	3.9539	1.81797e-05	up
MS.gene059765	8.15538	1.81903e-05	up
MS.gene44512	4.10671	1.8345e-05	up
MS.gene069890	7.90876	1.83519e-05	up
MS.gene030393	2.22617	1.85448e-05	up
MS.gene021315	2.416	1.85448e-05	up
MS.gene054104	4.80925	1.86017e-05	up
MS.gene34230	3.7471	1.86443e-05	up
MS.gene072311	8.77654	1.86849e-05	up
MS.gene59612	2.2434	1.89655e-05	up
MS.gene84419	2.62948	1.90406e-05	up
MS.gene000392	2.35808	1.94003e-05	up
MS.gene027867	2.91919	1.94024e-05	up
MS.gene33647	8.03154	1.94673e-05	up
MS.gene018708	8.96682	1.96418e-05	up
MS.gene034606	2.10426	1.9751e-05	up
MS.gene81319	8.34568	1.98241e-05	up
MS.gene80838	2.07142	1.98908e-05	up
MS.gene039107	4.73168	2.00077e-05	up
MS.gene57985	3.34536	2.02183e-05	up
MS.gene013162	8.14163	2.04475e-05	up
MS.gene41401	2.29203	2.04536e-05	up
MS.gene26784	2.48531	2.04714e-05	up
MS.gene43995	6.43037	2.05196e-05	up
MS.gene55272	9.06261	2.05317e-05	up
MS.gene057396	2.07438	2.08726e-05	up
MS.gene046484	3.69414	2.08867e-05	up
MS.gene032313	8.97412	2.10008e-05	up
MS.gene026535	5.45952	2.11619e-05	up
MS.gene69234	3.91684	2.11822e-05	up
MS.gene26783	8.31869	2.14056e-05	up
MS.gene073461	2.29345	2.15478e-05	up
MS.gene016458	4.16199	2.19184e-05	up
MS.gene018764	2.06562	2.21055e-05	up
MS.gene24337	2.61204	2.21413e-05	up
MS.gene28056	2.15126	2.21759e-05	up
MS.gene009993	3.5149	2.22284e-05	up
MS.gene028968	8.28676	2.24271e-05	up
MS.gene22559	8.28664	2.27118e-05	up
MS.gene010651	4.34514	2.28709e-05	up
MS.gene062847	2.74289	2.29846e-05	up
MS.gene063365	6.52444	2.3208e-05	up
MS.gene055350	3.30628	2.35759e-05	up
MS.gene031880	6.67521	2.35759e-05	up
MS.gene015413	2.83045	2.37917e-05	up
MS.gene016512	5.41126	2.38528e-05	up
MS.gene49905	7.22566	2.41865e-05	up
MS.gene011405	4.52461	2.47152e-05	up
MS.gene047631	4.52114	2.47309e-05	up
MS.gene028933	2.91491	2.49066e-05	up
MS.gene047447	5.1846	2.50182e-05	up
MS.gene48582	3.27137	2.50182e-05	up
MS.gene043504	4.65766	2.52249e-05	up
MS.gene056073	3.6589	2.53375e-05	up
MS.gene003836	3.87372	2.5567e-05	up
MS.gene026234	2.72135	2.56531e-05	up
MS.gene36450	2.898	2.57112e-05	up
MS.gene34461	2.12123	2.58184e-05	up
MS.gene47414	5.39456	2.58365e-05	up
MS.gene039955	4.91825	2.58798e-05	up
MS.gene56858	2.23133	2.58817e-05	up
MS.gene27711	5.68526	2.60256e-05	up
MS.gene29211	3.42523	2.63577e-05	up
MS.gene003534	2.79379	2.63962e-05	up
MS.gene033292	2.05422	2.64407e-05	up
MS.gene021137	6.48338	2.65463e-05	up
MS.gene043323	2.36996	2.6603e-05	up
MS.gene004256	3.90039	2.68973e-05	up
MS.gene32061	6.76079	2.68973e-05	up
MS.gene37657	3.1922	2.68973e-05	up
MS.gene021716	5.40328	2.68973e-05	up
MS.gene060976	3.20504	2.71851e-05	up
MS.gene014392	3.69177	2.73205e-05	up
MS.gene49170	3.36377	2.73823e-05	up
MS.gene93643	2.47193	2.748e-05	up
MS.gene97113	3.23099	2.75507e-05	up
MS.gene29213	3.5931	2.7782e-05	up
MS.gene20537	3.82466	2.80529e-05	up
MS.gene24338	7.63812	2.81279e-05	up
MS.gene026953	3.90585	2.83089e-05	up
MS.gene01361	3.47158	2.85227e-05	up
MS.gene93174	4.10398	2.85277e-05	up
MS.gene94265	4.50175	2.90462e-05	up
MS.gene21410	3.6701	2.94883e-05	up
MS.gene64726	2.93712	2.97693e-05	up
MS.gene31590	3.53355	2.97831e-05	up
MS.gene96408	2.16112	3.03478e-05	up
MS.gene004183	4.86436	3.04558e-05	up
MS.gene53311	2.73019	3.06085e-05	up
MS.gene011471	2.82147	3.08451e-05	up
MS.gene78643	2.00759	3.09763e-05	up
MS.gene21792	5.37191	3.11497e-05	up
MS.gene84662	2.60951	3.14264e-05	up
MS.gene066166	6.82475	3.18736e-05	up
MS.gene002609	2.34854	3.18886e-05	up
MS.gene004813	7.02958	3.18886e-05	up
MS.gene02505	5.43011	3.19108e-05	up
MS.gene69399	3.52478	3.24287e-05	up
MS.gene60767	3.88454	3.25625e-05	up
MS.gene88934	7.78753	3.26118e-05	up
MS.gene29210	3.89504	3.28144e-05	up
MS.gene020541	4.07415	3.31528e-05	up
MS.gene045063	4.26593	3.32419e-05	up
MS.gene048571	2.83063	3.32749e-05	up
MS.gene07746	4.03477	3.34566e-05	up
MS.gene068947	3.28623	3.34604e-05	up
MS.gene46953	3.22495	3.38809e-05	up
MS.gene76845	3.89047	3.38893e-05	up
MS.gene021446	5.01231	3.40889e-05	up
MS.gene064550	3.43381	3.40889e-05	up
MS.gene063833	3.88631	3.42954e-05	up
MS.gene63872	8.69371	3.43939e-05	up
MS.gene039314	7.496	3.43944e-05	up
MS.gene01419	3.05281	3.43944e-05	up
MS.gene027766	4.74443	3.46624e-05	up
MS.gene000238	6.65049	3.50962e-05	up
MS.gene016457	4.06145	3.51683e-05	up
MS.gene07507	7.52156	3.52617e-05	up
MS.gene019247	2.73656	3.5342e-05	up
MS.gene23017	3.8902	3.54383e-05	up
MS.gene87337	5.81787	3.55919e-05	up
MS.gene007962	4.54199	3.57367e-05	up
MS.gene028734	6.38079	3.57629e-05	up
MS.gene055018	4.17319	3.59365e-05	up
MS.gene015994	3.19505	3.59442e-05	up
MS.gene00227	2.45395	3.60796e-05	up
MS.gene47582	4.2614	3.62854e-05	up
MS.gene054070	2.38162	3.62945e-05	up
MS.gene43594	3.30431	3.6477e-05	up
MS.gene061576	4.00321	3.67519e-05	up
MS.gene70359	3.31397	3.6895e-05	up
MS.gene072263	4.11794	3.69011e-05	up
MS.gene067087	2.17474	3.75749e-05	up
MS.gene010691	8.17372	3.77052e-05	up
MS.gene061077	8.9835	3.79114e-05	up
MS.gene94677	3.14116	3.79114e-05	up
MS.gene22593	8.04264	3.80683e-05	up
MS.gene047611	5.26471	3.8227e-05	up
MS.gene31859	9.68213	3.84362e-05	up
MS.gene56620	4.58914	3.84629e-05	up
MS.gene050917	5.66185	3.84732e-05	up
MS.gene32159	3.61341	3.86801e-05	up
MS.gene063261	4.39596	3.87512e-05	up
MS.gene059576	3.40938	3.89795e-05	up
MS.gene04898	4.6149	3.95493e-05	up
MS.gene072804	2.56767	3.96098e-05	up
MS.gene047892	4.09873	3.97257e-05	up
MS.gene87339	5.53374	4.00931e-05	up
MS.gene35986	4.39129	4.0191e-05	up
MS.gene043338	2.13177	4.0485e-05	up
MS.gene71587	3.06295	4.0485e-05	up
MS.gene71446	8.12008	4.05293e-05	up
MS.gene013875	2.9947	4.05293e-05	up
MS.gene85784	2.73701	4.05293e-05	up
MS.gene054108	3.22728	4.06916e-05	up
MS.gene96813	7.44186	4.07148e-05	up
MS.gene40642	3.4822	4.11847e-05	up
MS.gene64334	2.81343	4.22832e-05	up
MS.gene08166	4.14477	4.33406e-05	up
MS.gene90585	2.16465	4.33773e-05	up
MS.gene069226	3.92199	4.36292e-05	up
MS.gene027385	2.11302	4.36387e-05	up
MS.gene059820	2.99918	4.40832e-05	up
MS.gene63349	4.91365	4.42323e-05	up
MS.gene009009	4.30552	4.4299e-05	up
MS.gene016897	6.77074	4.43446e-05	up
MS.gene029498	2.63678	4.4369e-05	up
MS.gene67512	3.07276	4.44833e-05	up
MS.gene062738	2.232	4.46647e-05	up
MS.gene002275	9.43966	4.47502e-05	up
MS.gene04506	2.57264	4.50583e-05	up
MS.gene83298	3.01837	4.50583e-05	up
MS.gene047974	3.1254	4.5136e-05	up
MS.gene057772	6.40212	4.54383e-05	up
MS.gene71193	3.84818	4.55017e-05	up
MS.gene23651	5.30938	4.57392e-05	up
MS.gene65029	2.1091	4.57392e-05	up
MS.gene011683	2.97169	4.60532e-05	up
MS.gene24718	6.54287	4.61663e-05	up
MS.gene017210	4.1388	4.64686e-05	up
MS.gene44949	7.70031	4.66411e-05	up
MS.gene09777	2.60272	4.68272e-05	up
MS.gene006228	3.56914	4.69928e-05	up
MS.gene33622	3.73289	4.71761e-05	up
MS.gene81071	4.25334	4.76888e-05	up
MS.gene62239	3.35904	4.80942e-05	up
MS.gene018307	3.65098	4.82832e-05	up
MS.gene70957	2.15727	4.85104e-05	up
MS.gene069238	3.22614	4.86263e-05	up
MS.gene064787	3.45484	4.87036e-05	up
MS.gene042861	3.59525	4.92933e-05	up
MS.gene45047	2.51647	4.9379e-05	up
MS.gene013400	4.79562	4.95223e-05	up
MS.gene90673	4.27812	4.96064e-05	up
MS.gene057174	2.50295	4.96231e-05	up
MS.gene06302	7.95582	5.00232e-05	up
MS.gene88620	4.09154	5.00784e-05	up
MS.gene063386	4.15165	5.01012e-05	up
MS.gene072763	7.91377	5.05978e-05	up
MS.gene75928	5.41568	5.06119e-05	up
MS.gene39418	3.08999	5.06119e-05	up
MS.gene69302	2.56748	5.07276e-05	up
MS.gene039758	3.10119	5.11202e-05	up
MS.gene041780	6.36243	5.13322e-05	up
MS.gene013213	4.05729	5.17717e-05	up
MS.gene74858	4.55329	5.20062e-05	up
MS.gene84168	8.5286	5.23369e-05	up
MS.gene48638	2.68896	5.25943e-05	up
MS.gene51298	5.286	5.27815e-05	up
MS.gene046027	3.00061	5.28836e-05	up
MS.gene22278	2.20068	5.31064e-05	up
MS.gene000091	2.82258	5.32941e-05	up
MS.gene031822	3.66264	5.32941e-05	up
MS.gene028220	2.14153	5.34728e-05	up
MS.gene39295	3.22805	5.35769e-05	up
MS.gene062852	3.3715	5.36122e-05	up
MS.gene01063	4.44968	5.41916e-05	up
MS.gene57308	4.84395	5.49615e-05	up
MS.gene002595	2.21219	5.49644e-05	up
MS.gene56911	3.32648	5.55742e-05	up
MS.gene53581	2.7349	5.57169e-05	up
MS.gene027865	2.72997	5.58994e-05	up
MS.gene014878	3.75714	5.62673e-05	up
MS.gene29058	3.52518	5.6352e-05	up
MS.gene026588	2.89184	5.67192e-05	up
MS.gene055333	2.13751	5.73499e-05	up
MS.gene70293	2.60535	5.74425e-05	up
MS.gene07155	3.88571	5.74955e-05	up
MS.gene006227	2.94216	5.79317e-05	up
MS.gene31503	2.93237	5.80614e-05	up
MS.gene071042	3.81805	5.83257e-05	up
MS.gene21653	3.97895	5.83257e-05	up
MS.gene013563	3.1865	5.83257e-05	up
MS.gene25115	2.63998	5.83257e-05	up
MS.gene068274	3.87541	5.87053e-05	up
MS.gene23686	7.78443	5.88222e-05	up
MS.gene76610	4.35332	5.88454e-05	up
MS.gene34186	4.26298	5.88454e-05	up
MS.gene004278	3.43905	5.90487e-05	up
MS.gene43797	3.58608	5.93934e-05	up
MS.gene07152	2.20686	5.95033e-05	up
MS.gene007891	3.04923	5.95581e-05	up
MS.gene006747	4.35035	6.01706e-05	up
MS.gene06022	2.01515	6.02751e-05	up
MS.gene28291	7.44998	6.03172e-05	up
MS.gene040599	4.11922	6.03439e-05	up
MS.gene60157	4.52715	6.03439e-05	up
MS.gene023776	2.9442	6.04371e-05	up
MS.gene044946	8.38412	6.07263e-05	up
MS.gene60714	2.67001	6.07608e-05	up
MS.gene039821	4.32393	6.07608e-05	up
MS.gene051309	2.05348	6.08909e-05	up
MS.gene97745	3.22367	6.10424e-05	up
MS.gene059540	2.52108	6.12504e-05	up
MS.gene20052	2.3504	6.15104e-05	up
MS.gene21770	2.06759	6.15321e-05	up
MS.gene91900	2.98508	6.16104e-05	up
MS.gene55676	8.78992	6.16893e-05	up
MS.gene28447	5.76891	6.17349e-05	up
MS.gene028584	2.11549	6.19819e-05	up
MS.gene02631	5.53236	6.19819e-05	up
MS.gene027788	2.14671	6.21667e-05	up
MS.gene007632	2.72861	6.21845e-05	up
MS.gene020542	8.45702	6.22732e-05	up
MS.gene96121	2.97019	6.23567e-05	up
MS.gene28060	3.26503	6.24215e-05	up
MS.gene014297	3.39544	6.34252e-05	up
MS.gene017439	4.95075	6.35543e-05	up
MS.gene84175	2.51821	6.41509e-05	up
MS.gene84114	3.42455	6.48066e-05	up
MS.gene55783	3.90571	6.494e-05	up
MS.gene02270	2.78381	6.57931e-05	up
MS.gene82502	3.16997	6.59659e-05	up
MS.gene064939	2.90015	6.60366e-05	up
MS.gene48581	3.3232	6.60366e-05	up
MS.gene004769	3.59254	6.60908e-05	up
MS.gene066970	3.50877	6.61296e-05	up
MS.gene034987	5.0905	6.65539e-05	up
MS.gene23771	4.51431	6.65539e-05	up
MS.gene33867	4.88027	6.7491e-05	up
MS.gene059224	2.21248	6.75134e-05	up
MS.gene062559	3.18247	6.75955e-05	up
MS.gene73199	2.5953	6.81355e-05	up
MS.gene50566	2.80034	6.82304e-05	up
MS.gene055766	2.42506	6.893e-05	up
MS.gene48325	2.43373	6.90692e-05	up
MS.gene007896	3.0222	6.91269e-05	up
MS.gene79790	3.36291	6.9143e-05	up
MS.gene005012	2.70599	6.94009e-05	up
MS.gene070643	3.70057	6.96916e-05	up
MS.gene31707	2.15982	7.04871e-05	up
MS.gene21722	2.28663	7.06325e-05	up
MS.gene030963	2.61566	7.11236e-05	up
MS.gene006212	2.15257	7.18234e-05	up
MS.gene061968	5.1198	7.226e-05	up
MS.gene060274	4.05505	7.23818e-05	up
MS.gene22751	3.29496	7.25688e-05	up
MS.gene46156	2.02119	7.25688e-05	up
MS.gene021916	2.88304	7.33525e-05	up
MS.gene025436	2.13785	7.34831e-05	up
MS.gene010578	3.2181	7.3555e-05	up
MS.gene08379	2.00224	7.36018e-05	up
MS.gene006813	2.50635	7.39104e-05	up
MS.gene66406	2.09195	7.4266e-05	up
MS.gene48016	3.99289	7.4271e-05	up
MS.gene28775	2.48793	7.51478e-05	up
MS.gene014877	2.20436	7.53082e-05	up
MS.gene051976	3.32901	7.53934e-05	up
MS.gene016667	2.27582	7.6118e-05	up
MS.gene060083	2.10796	7.6423e-05	up
MS.gene22520	2.23483	7.64351e-05	up
MS.gene02626	8.81469	7.64351e-05	up
MS.gene031427	2.96907	7.65007e-05	up
MS.gene71334	2.52449	7.65007e-05	up
MS.gene96832	3.76628	7.65448e-05	up
MS.gene017676	2.79686	7.72731e-05	up
MS.gene62122	3.22413	7.77099e-05	up
MS.gene82378	3.14398	7.7722e-05	up
MS.gene005602	3.94332	7.82526e-05	up
MS.gene024692	3.07178	7.83905e-05	up
MS.gene80827	2.01267	7.84364e-05	up
MS.gene28626	4.13002	7.85698e-05	up
MS.gene018738	4.13241	7.86994e-05	up
MS.gene065717	3.78235	7.88487e-05	up
MS.gene79637	4.05855	7.91113e-05	up
MS.gene39953	3.04093	7.93304e-05	up
MS.gene056363	2.51836	7.969e-05	up
MS.gene52510	4.43577	8.00983e-05	up
MS.gene019598	3.90328	8.02163e-05	up
MS.gene44647	3.00342	8.04677e-05	up
MS.gene20730	2.80497	8.04831e-05	up
MS.gene44627	4.97241	8.05941e-05	up
MS.gene05943	6.83753	8.07532e-05	up
MS.gene28027	2.69562	8.12377e-05	up
MS.gene067173	2.32705	8.13628e-05	up
MS.gene21170	2.09563	8.15704e-05	up
MS.gene043996	3.48561	8.16833e-05	up
MS.gene84729	6.13696	8.24795e-05	up
MS.gene08012	3.51751	8.25726e-05	up
MS.gene97384	3.50673	8.2723e-05	up
MS.gene053124	2.31932	8.2723e-05	up
MS.gene011321	3.10894	8.28808e-05	up
MS.gene028624	5.67004	8.31482e-05	up
MS.gene027089	2.75197	8.3924e-05	up
MS.gene002512	8.08792	8.44504e-05	up
MS.gene36453	3.76992	8.45577e-05	up
MS.gene029925	3.26567	8.53172e-05	up
MS.gene89075	9.30692	8.55416e-05	up
MS.gene027623	2.46518	8.56719e-05	up
MS.gene062645	3.30684	8.60348e-05	up
MS.gene24282	3.56085	8.62464e-05	up
MS.gene54708	5.1879	8.62476e-05	up
MS.gene057239	6.01733	8.67678e-05	up
MS.gene60673	2.65122	8.68767e-05	up
MS.gene010557	3.17875	8.68767e-05	up
MS.gene073343	3.45365	8.71312e-05	up
MS.gene41274	2.98819	8.71874e-05	up
MS.gene01450	7.42123	8.74072e-05	up
MS.gene067783	4.89424	8.74653e-05	up
MS.gene041334	2.25071	8.79035e-05	up
MS.gene80821	8.11507	8.82638e-05	up
MS.gene03263	5.8023	8.83569e-05	up
MS.gene011385	8.46718	8.83654e-05	up
MS.gene018379	4.51859	8.86388e-05	up
MS.gene064303	7.94409	8.89471e-05	up
MS.gene71750	2.16115	8.92431e-05	up
MS.gene65380	2.42167	8.96708e-05	up
MS.gene74935	3.31617	8.9717e-05	up
MS.gene033566	2.87185	8.98292e-05	up
MS.gene32433	2.17899	9.01778e-05	up
MS.gene045639	4.96518	9.02977e-05	up
MS.gene76835	4.51155	9.03118e-05	up
MS.gene22701	2.8031	9.06075e-05	up
MS.gene028480	2.2622	9.06075e-05	up
MS.gene007732	2.72377	9.06952e-05	up
MS.gene005813	2.21947	9.08677e-05	up
MS.gene065180	2.5799	9.09972e-05	up
MS.gene018418	3.85609	9.13002e-05	up
MS.gene056502	3.23692	9.1562e-05	up
MS.gene26363	7.44001	9.16089e-05	up
MS.gene47480	3.14041	9.16127e-05	up
MS.gene06502	3.08046	9.18145e-05	up
MS.gene056064	3.51728	9.25122e-05	up
MS.gene71748	3.10843	9.29671e-05	up
MS.gene43116	3.09045	9.30841e-05	up
MS.gene043222	3.69567	9.40171e-05	up
MS.gene015091	2.66755	9.41849e-05	up
MS.gene50170	4.0994	9.43164e-05	up
MS.gene033287	4.01813	9.48734e-05	up
MS.gene019156	2.66864	9.48748e-05	up
MS.gene053175	3.30575	9.51522e-05	up
MS.gene070637	4.16359	9.55819e-05	up
MS.gene99075	2.34632	9.56808e-05	up
MS.gene27210	2.76511	9.63501e-05	up
MS.gene89884	2.75517	9.65599e-05	up
MS.gene40759	4.8926	9.68764e-05	up
MS.gene95699	2.80736	9.72787e-05	up
MS.gene76513	3.75823	9.74484e-05	up
MS.gene05626	2.01918	9.74484e-05	up
MS.gene026594	3.4722	9.75659e-05	up
MS.gene31537	8.75007	9.78536e-05	up
MS.gene46443	3.87194	9.83564e-05	up
MS.gene24581	5.3449	9.85341e-05	up
MS.gene057472	7.56495	9.8557e-05	up
MS.gene95463	3.34891	9.86736e-05	up
MS.gene60916	7.62232	9.86736e-05	up
MS.gene35122	3.03679	9.90936e-05	up
MS.gene50275	4.66308	9.92347e-05	up
MS.gene91141	3.35504	9.92357e-05	up
MS.gene017435	3.17179	9.93898e-05	up
MS.gene39506	4.85469	9.93898e-05	up
MS.gene017160	4.3837	9.9631e-05	up
MS.gene073531	2.96524	9.96368e-05	up
MS.gene013646	4.41822	0.000100114	up
MS.gene043287	2.25193	0.000100114	up
MS.gene46385	2.64754	0.000100376	up
MS.gene037072	4.31429	0.000102067	up
MS.gene020084	2.09438	0.000102098	up
MS.gene95324	3.02935	0.00010248	up
MS.gene87168	4.91402	0.00010435	up
MS.gene030155	3.51542	0.00010455	up
MS.gene059573	2.36793	0.000104582	up
MS.gene022928	5.11411	0.000104738	up
MS.gene043507	2.69529	0.000104754	up
MS.gene054384	4.61343	0.000104834	up
MS.gene64188	3.72023	0.000105653	up
MS.gene002586	4.8656	0.000106744	up
MS.gene03399	2.25614	0.000107904	up
MS.gene86524	2.30527	0.000108371	up
MS.gene002840	3.01055	0.000108591	up
MS.gene29481	2.83366	0.000109867	up
MS.gene045301	9.01483	0.000110806	up
MS.gene42827	10.5881	0.000111071	up
MS.gene47380	8.69409	0.000111093	up
MS.gene062650	2.48237	0.000111093	up
MS.gene58420	2.60808	0.000111682	up
MS.gene023495	5.0565	0.000112575	up
MS.gene55660	2.8467	0.000113977	up
MS.gene88345	2.9844	0.000114336	up
MS.gene030591	6.95336	0.00011491	up
MS.gene021509	2.52478	0.000115305	up
MS.gene053519	3.07296	0.000115305	up
MS.gene66447	3.28452	0.000115497	up
MS.gene049182	3.35616	0.000115606	up
MS.gene48485	5.97996	0.000116805	up
MS.gene39751	4.29945	0.000117316	up
MS.gene01769	3.68401	0.000117319	up
MS.gene051177	5.5552	0.00011735	up
MS.gene20981	4.78748	0.000117991	up
MS.gene60686	2.96195	0.000118838	up
MS.gene001359	6.16585	0.000119042	up
MS.gene024888	2.01449	0.000119723	up
MS.gene68785	2.33183	0.000121074	up
MS.gene020979	3.26733	0.000121144	up
MS.gene059089	3.6161	0.000121254	up
MS.gene27037	2.30355	0.000121254	up
MS.gene31782	3.75346	0.00012143	up
MS.gene05845	3.97414	0.000121625	up
MS.gene026657	3.86679	0.000122399	up
MS.gene072560	5.41301	0.000123726	up
MS.gene68575	2.43935	0.000124023	up
MS.gene83073	4.8601	0.000124045	up
MS.gene48512	3.27755	0.000125468	up
MS.gene008876	4.34884	0.00012584	up
MS.gene75379	4.83434	0.000127162	up
MS.gene074324	7.24096	0.000127187	up
MS.gene67570	3.1026	0.000129854	up
MS.gene58342	2.58512	0.000129854	up
MS.gene90238	2.53133	0.000130243	up
MS.gene97063	3.19492	0.000130849	up
MS.gene20414	3.78031	0.000130919	up
MS.gene025771	3.67355	0.000131744	up
MS.gene010552	9.33877	0.000132474	up
MS.gene65352	7.18372	0.000132919	up
MS.gene32090	2.69187	0.000133035	up
MS.gene045043	4.64173	0.000133052	up
MS.gene35563	5.15415	0.000133142	up
MS.gene023471	3.66368	0.000133147	up
MS.gene99888	4.51999	0.000133986	up
MS.gene038531	2.21117	0.000133988	up
MS.gene49156	3.81406	0.00013501	up
MS.gene33139	4.06986	0.000135237	up
MS.gene024227	3.48809	0.000135566	up
MS.gene56667	3.74017	0.00013601	up
MS.gene04818	3.78693	0.000136484	up
MS.gene92110	4.67614	0.000137035	up
MS.gene23514	3.32676	0.000137123	up
MS.gene64723	3.06174	0.000137195	up
MS.gene76424	3.10995	0.00013805	up
MS.gene063188	2.57047	0.000139177	up
MS.gene021731	3.53196	0.000139177	up
MS.gene07135	2.96261	0.00014058	up
MS.gene79644	4.08514	0.000141006	up
MS.gene046787	2.43507	0.000141855	up
MS.gene60604	2.18701	0.000141913	up
MS.gene27882	2.08331	0.000142254	up
MS.gene063157	4.36242	0.000142361	up
MS.gene60615	3.32466	0.000143062	up
MS.gene52993	6.62971	0.000143099	up
MS.gene063026	2.02423	0.000143547	up
MS.gene056161	2.54377	0.000143765	up
MS.gene025202	6.37377	0.000144878	up
MS.gene57124	3.77104	0.000145877	up
MS.gene43808	8.55362	0.00014605	up
MS.gene06719	3.10988	0.000146758	up
MS.gene49062	2.62015	0.000147185	up
MS.gene36867	8.92064	0.000147185	up
MS.gene037322	2.24416	0.00014833	up
MS.gene36423	4.97703	0.000148388	up
MS.gene060518	6.72698	0.000149293	up
MS.gene037746	7.52027	0.000150196	up
MS.gene073239	2.9766	0.000150431	up
MS.gene026315	3.61258	0.000150993	up
MS.gene89511	5.66293	0.000151039	up
MS.gene34992	2.0718	0.000151212	up
MS.gene68292	8.50412	0.000151489	up
MS.gene32677	2.35447	0.000151719	up
MS.gene38123	3.20153	0.000151794	up
MS.gene92775	2.75808	0.000152764	up
MS.gene48787	3.39877	0.000152981	up
MS.gene53669	3.77624	0.000153161	up
MS.gene43906	2.20624	0.000153713	up
MS.gene003644	2.9753	0.000153754	up
MS.gene98143	2.69947	0.000154141	up
MS.gene28904	2.52116	0.000154682	up
MS.gene41597	2.46512	0.000154682	up
MS.gene023583	5.05315	0.000155712	up
MS.gene28584	4.56631	0.000155712	up
MS.gene46056	4.2208	0.000156394	up
MS.gene45495	3.7338	0.000157428	up
MS.gene029503	2.87406	0.000157453	up
MS.gene04154	3.55813	0.000158105	up
MS.gene02417	2.57466	0.000158845	up
MS.gene56130	2.90692	0.000158845	up
MS.gene069590	8.14434	0.000158961	up
MS.gene05803	7.57203	0.000159142	up
MS.gene70641	2.69237	0.000159228	up
MS.gene94198	5.62176	0.000160818	up
MS.gene47791	4.73111	0.000160818	up
MS.gene003544	3.00987	0.000161729	up
MS.gene040526	3.31867	0.000163253	up
MS.gene019494	6.1842	0.000163432	up
MS.gene34236	2.5467	0.000163664	up
MS.gene69010	3.31023	0.000163807	up
MS.gene38656	2.20776	0.000164065	up
MS.gene025173	2.63516	0.000164299	up
MS.gene055811	2.73882	0.000164869	up
MS.gene50169	3.24234	0.000165857	up
MS.gene36457	8.19228	0.000165857	up
MS.gene014382	3.66472	0.000165913	up
MS.gene001107	2.12784	0.000167077	up
MS.gene49005	4.8902	0.000167281	up
MS.gene29794	6.25527	0.000167551	up
MS.gene053602	8.40755	0.000167702	up
MS.gene92139	2.04593	0.000168569	up
MS.gene55169	2.14116	0.000169707	up
MS.gene033502	3.10588	0.000170588	up
MS.gene048533	2.54987	0.000171288	up
MS.gene92068	8.95199	0.0001726	up
MS.gene41702	8.0145	0.000172701	up
MS.gene65244	5.90457	0.000172709	up
MS.gene074125	4.69906	0.000174722	up
MS.gene033428	9.0616	0.000174865	up
MS.gene011102	8.96724	0.000174921	up
MS.gene94431	6.93674	0.000175056	up
MS.gene79876	3.70691	0.000175377	up
MS.gene028636	3.81504	0.000175636	up
MS.gene016740	4.63547	0.000176677	up
MS.gene95979	3.90451	0.000177449	up
MS.gene59206	2.3428	0.000177678	up
MS.gene85493	2.7749	0.000177764	up
MS.gene043398	4.83017	0.000178168	up
MS.gene58042	2.63105	0.000178171	up
MS.gene44644	2.80966	0.00017897	up
MS.gene007855	3.63464	0.000179841	up
MS.gene70164	3.14269	0.00018092	up
MS.gene044101	3.38289	0.000181433	up
MS.gene65942	5.9095	0.000181666	up
MS.gene85272	3.16411	0.000182289	up
MS.gene014138	4.05486	0.0001823	up
MS.gene99800	2.19556	0.000182302	up
MS.gene84647	2.7881	0.0001846	up
MS.gene45855	2.74187	0.000184625	up
MS.gene032566	7.09963	0.000185797	up
MS.gene002688	5.01792	0.000185891	up
MS.gene30403	2.3793	0.000185962	up
MS.gene85787	2.78942	0.000185989	up
MS.gene017559	3.95212	0.000186236	up
MS.gene072183	3.43476	0.000186425	up
MS.gene060975	4.32755	0.00018677	up
MS.gene42415	5.70423	0.00018677	up
MS.gene044112	3.55161	0.000188269	up
MS.gene99191	5.54585	0.000188497	up
MS.gene86480	5.52032	0.000188723	up
MS.gene057691	2.89738	0.000189423	up
MS.gene79645	3.73638	0.000189747	up
MS.gene45616	4.72622	0.000190075	up
MS.gene40127	8.3026	0.000190516	up
MS.gene004927	2.98802	0.000191283	up
MS.gene93057	2.57563	0.000191634	up
MS.gene071530	4.74579	0.000192558	up
MS.gene036721	2.6342	0.000192558	up
MS.gene45933	2.08262	0.000193091	up
MS.gene23269	2.31902	0.000194362	up
MS.gene028506	8.38979	0.00019441	up
MS.gene27362	3.28609	0.000194918	up
MS.gene08014	2.30039	0.000196024	up
MS.gene055765	3.44048	0.000197886	up
MS.gene023438	2.74718	0.00019841	up
MS.gene032655	2.04287	0.000200497	up
MS.gene025556	3.32278	0.000200556	up
MS.gene65890	3.12816	0.000201406	up
MS.gene64614	3.55495	0.00020198	up
MS.gene068123	3.80509	0.0002021	up
MS.gene072708	9.36096	0.000203519	up
MS.gene96068	4.29057	0.000205795	up
MS.gene86510	3.25152	0.000206245	up
MS.gene73344	2.20397	0.000206645	up
MS.gene070069	2.87974	0.000206645	up
MS.gene60248	6.75899	0.000207877	up
MS.gene91595	2.90898	0.000208695	up
MS.gene018365	3.70164	0.000208945	up
MS.gene050505	2.54832	0.000209022	up
MS.gene28834	2.16098	0.000209037	up
MS.gene072370	8.54854	0.000209037	up
MS.gene049068	3.50433	0.000209331	up
MS.gene95917	2.03762	0.000209333	up
MS.gene38762	7.82046	0.000209547	up
MS.gene70138	3.07998	0.000210423	up
MS.gene006894	2.05405	0.000210997	up
MS.gene062929	3.10562	0.000211137	up
MS.gene034057	4.65605	0.000211681	up
MS.gene46474	2.19001	0.000212882	up
MS.gene58570	2.46427	0.000213041	up
MS.gene35633	2.10224	0.000213294	up
MS.gene37703	3.6574	0.000213731	up
MS.gene89156	3.03246	0.000214157	up
MS.gene005824	4.60727	0.000215198	up
MS.gene31472	3.06787	0.000215283	up
MS.gene035897	2.19618	0.000215283	up
MS.gene95625	2.05583	0.000215482	up
MS.gene008960	3.77554	0.000215551	up
MS.gene006689	2.09179	0.000215551	up
MS.gene015382	4.95035	0.000216002	up
MS.gene055913	2.13202	0.000217596	up
MS.gene056427	3.86101	0.000217596	up
MS.gene070823	4.50318	0.000217904	up
MS.gene95952	2.13209	0.000217904	up
MS.gene98248	2.62193	0.000218631	up
MS.gene22519	3.5086	0.000218635	up
MS.gene026168	3.21595	0.000218837	up
MS.gene045348	3.81612	0.000219484	up
MS.gene069185	2.06382	0.000219534	up
MS.gene37167	8.01864	0.000220055	up
MS.gene032791	2.59576	0.000220059	up
MS.gene32183	3.02014	0.000220828	up
MS.gene32715	3.09858	0.000222673	up
MS.gene060371	5.60398	0.000222711	up
MS.gene56474	3.48607	0.000223324	up
MS.gene034078	3.27789	0.000225154	up
MS.gene012244	2.19548	0.000229269	up
MS.gene012012	2.70617	0.000230165	up
MS.gene32575	9.14583	0.000230696	up
MS.gene08977	2.19809	0.000231973	up
MS.gene49157	4.19	0.000232947	up
MS.gene06500	7.1428	0.000233671	up
MS.gene83853	8.39478	0.000233706	up
MS.gene052922	9.11543	0.0002354	up
MS.gene064121	2.1061	0.000235423	up
MS.gene008813	3.95028	0.000235715	up
MS.gene25879	3.3707	0.000235772	up
MS.gene60035	7.36685	0.000236126	up
MS.gene034186	3.10885	0.000237888	up
MS.gene56168	3.74231	0.000239072	up
MS.gene004158	3.59762	0.000240051	up
MS.gene067478	3.80811	0.000242131	up
MS.gene82321	5.41698	0.000243335	up
MS.gene067188	3.01661	0.000244333	up
MS.gene09259	4.34565	0.000245543	up
MS.gene52195	2.0255	0.000246066	up
MS.gene040516	3.09288	0.000246113	up
MS.gene20362	5.84308	0.000246146	up
MS.gene32560	5.34975	0.000246146	up
MS.gene70365	2.12405	0.000246146	up
MS.gene020581	8.55182	0.000247714	up
MS.gene43861	4.49293	0.00024773	up
MS.gene065694	8.9827	0.00024773	up
MS.gene013215	7.82318	0.00024773	up
MS.gene05469	2.31248	0.000247748	up
MS.gene036407	2.64635	0.000248565	up
MS.gene041214	2.04037	0.000248565	up
MS.gene93873	3.78309	0.000248848	up
MS.gene02255	5.97535	0.000250014	up
MS.gene32011	6.98185	0.000250311	up
MS.gene62977	3.98456	0.000250661	up
MS.gene056985	2.72132	0.000251292	up
MS.gene28009	4.69602	0.000252137	up
MS.gene010242	8.50505	0.000252305	up
MS.gene08811	6.03199	0.000252305	up
MS.gene05942	5.03272	0.000252952	up
MS.gene029955	2.21018	0.000253434	up
MS.gene80209	3.36329	0.000254312	up
MS.gene07556	2.27167	0.00025447	up
MS.gene045279	2.68817	0.000255599	up
MS.gene43424	5.16725	0.000256323	up
MS.gene84054	3.02643	0.000256579	up
MS.gene061227	3.70959	0.000256579	up
MS.gene016678	4.75114	0.00025748	up
MS.gene36458	8.74604	0.000257503	up
MS.gene79733	2.71857	0.000257903	up
MS.gene32562	5.32125	0.000259216	up
MS.gene80680	6.97701	0.000259834	up
MS.gene050802	6.07291	0.000260008	up
MS.gene39896	6.34256	0.000260617	up
MS.gene017679	2.0253	0.000260617	up
MS.gene023243	3.98229	0.000260675	up
MS.gene94992	2.03119	0.000260894	up
MS.gene000140	3.34153	0.000261096	up
MS.gene80531	2.09526	0.000263192	up
MS.gene63052	7.86887	0.000263654	up
MS.gene21358	6.16069	0.000264361	up
MS.gene072635	2.88513	0.000264563	up
MS.gene047988	5.12029	0.000264654	up
MS.gene76600	2.34154	0.000265053	up
MS.gene51601	3.21784	0.000265149	up
MS.gene051547	7.22989	0.000265232	up
MS.gene43952	3.16787	0.000265253	up
MS.gene000409	7.66983	0.0002662	up
MS.gene011868	5.59462	0.000266239	up
MS.gene36554	4.2279	0.000266389	up
MS.gene48786	9.17414	0.00026645	up
MS.gene40128	3.63212	0.000267829	up
MS.gene66256	2.41991	0.000267829	up
MS.gene51842	2.40352	0.000267904	up
MS.gene91596	2.68921	0.000267904	up
MS.gene048762	6.71094	0.000267916	up
MS.gene20006	2.90746	0.000268511	up
MS.gene06076	4.02959	0.000268671	up
MS.gene52887	3.09243	0.000268852	up
MS.gene069368	4.19609	0.000268852	up
MS.gene55715	2.64732	0.000270378	up
MS.gene002391	2.38474	0.000271693	up
MS.gene066328	7.86599	0.000272027	up
MS.gene36742	4.42194	0.000272162	up
MS.gene70963	2.29738	0.000272458	up
MS.gene41836	2.64164	0.000274423	up
MS.gene97685	4.23715	0.000276959	up
MS.gene88000	8.26489	0.00027735	up
MS.gene064234	3.0214	0.00027841	up
MS.gene037807	3.73467	0.000280486	up
MS.gene75150	2.12235	0.000281223	up
MS.gene05415	2.07028	0.000281661	up
MS.gene043846	3.16416	0.00028217	up
MS.gene010275	3.54279	0.000282463	up
MS.gene030088	2.42345	0.000282682	up
MS.gene56692	2.95242	0.000283616	up
MS.gene059776	6.72961	0.000283754	up
MS.gene46061	7.50617	0.000284446	up
MS.gene042099	9.22408	0.000285422	up
MS.gene034827	4.47488	0.000285716	up
MS.gene65568	2.40798	0.00028595	up
MS.gene059189	8.44558	0.000286504	up
MS.gene74706	3.4299	0.000286504	up
MS.gene043948	6.37139	0.000288646	up
MS.gene013032	2.60124	0.000290122	up
MS.gene36708	3.24205	0.000290771	up
MS.gene026971	2.0488	0.000293372	up
MS.gene29614	4.02082	0.000294059	up
MS.gene051115	3.56339	0.000294059	up
MS.gene024762	4.75812	0.000295	up
MS.gene24952	4.75347	0.000295596	up
MS.gene01064	7.31058	0.000296924	up
MS.gene012160	2.63654	0.000296924	up
MS.gene032172	2.21231	0.000296946	up
MS.gene045036	3.67664	0.00029738	up
MS.gene069078	2.6791	0.000297834	up
MS.gene52630	2.44193	0.000298576	up
MS.gene48615	3.20983	0.000298667	up
MS.gene33262	4.63387	0.00029966	up
MS.gene08006	2.86339	0.000300603	up
MS.gene030718	2.83474	0.000302502	up
MS.gene055841	2.7932	0.000303396	up
MS.gene63351	5.08543	0.000303508	up
MS.gene74859	2.07082	0.00030454	up
MS.gene032147	4.70303	0.000304811	up
MS.gene32238	2.61297	0.000306817	up
MS.gene52870	2.84316	0.000311642	up
MS.gene03838	5.39904	0.00031191	up
MS.gene021604	2.05843	0.000312292	up
MS.gene029288	3.73721	0.000312951	up
MS.gene005533	3.9808	0.000312951	up
MS.gene23273	5.92111	0.000312951	up
MS.gene44432	2.77397	0.000314631	up
MS.gene026714	2.80374	0.000314852	up
MS.gene031460	6.5645	0.000316475	up
MS.gene039318	2.25957	0.000317096	up
MS.gene039471	6.82685	0.000317171	up
MS.gene019960	5.68969	0.000317985	up
MS.gene43289	2.86765	0.000317985	up
MS.gene21938	3.79289	0.000318757	up
MS.gene08019	2.27004	0.000320575	up
MS.gene039468	3.49932	0.000321636	up
MS.gene95130	3.69574	0.000321698	up
MS.gene039822	6.78681	0.00032216	up
MS.gene049073	7.44816	0.000322704	up
MS.gene80794	2.02945	0.000322818	up
MS.gene97662	6.92484	0.00032527	up
MS.gene030228	5.09425	0.000325297	up
MS.gene71789	2.8585	0.000325962	up
MS.gene96909	3.51126	0.000326585	up
MS.gene32718	6.22738	0.000328391	up
MS.gene043438	2.43735	0.0003285	up
MS.gene054717	3.82422	0.000329658	up
MS.gene43987	2.50146	0.000330061	up
MS.gene006150	9.11027	0.000330332	up
MS.gene50167	4.87968	0.000330498	up
MS.gene95595	2.27012	0.000330787	up
MS.gene37289	2.90897	0.00033301	up
MS.gene012578	5.36281	0.000333135	up
MS.gene64615	7.71424	0.000333159	up
MS.gene016463	3.98419	0.000333159	up
MS.gene61588	3.08626	0.00033503	up
MS.gene074096	5.6473	0.00033554	up
MS.gene94149	3.0707	0.000335615	up
MS.gene030404	2.33192	0.000335615	up
MS.gene050961	5.45834	0.000335615	up
MS.gene21349	3.71594	0.000336278	up
MS.gene028017	3.32346	0.000337689	up
MS.gene54761	3.62596	0.000337913	up
MS.gene035155	7.04082	0.000338431	up
MS.gene49725	2.93667	0.000341017	up
MS.gene29611	2.25036	0.000342408	up
MS.gene22762	4.63427	0.000342563	up
MS.gene010556	3.02995	0.000342914	up
MS.gene049790	4.63683	0.000344446	up
MS.gene20839	4.21795	0.000344937	up
MS.gene046962	3.34981	0.000344988	up
MS.gene08736	3.68436	0.000345887	up
MS.gene99020	2.65686	0.000346701	up
MS.gene007535	4.30041	0.000346766	up
MS.gene057287	2.25458	0.000347908	up
MS.gene33895	4.49725	0.000347908	up
MS.gene013452	2.00171	0.000347908	up
MS.gene26283	4.08071	0.000347959	up
MS.gene53084	2.14971	0.000348548	up
MS.gene050363	9.23755	0.000349518	up
MS.gene27958	4.7469	0.000350301	up
MS.gene072443	2.95677	0.000352742	up
MS.gene93030	2.07694	0.000353121	up
MS.gene22915	3.63115	0.000353943	up
MS.gene40636	4.20182	0.000354988	up
MS.gene015403	3.18478	0.00035583	up
MS.gene71883	6.56576	0.00035684	up
MS.gene040820	2.2631	0.000357542	up
MS.gene40033	2.04273	0.000357884	up
MS.gene22312	7.89269	0.000358635	up
MS.gene071846	2.14008	0.000359994	up
MS.gene56611	4.06302	0.000360081	up
MS.gene062410	4.77203	0.000361423	up
MS.gene32903	6.99899	0.000361548	up
MS.gene71298	7.15786	0.000361652	up
MS.gene002405	6.54635	0.000362389	up
MS.gene058843	2.40754	0.000362503	up
MS.gene034489	4.97148	0.000365484	up
MS.gene032928	2.3973	0.000368677	up
MS.gene07615	4.39937	0.000370446	up
MS.gene023443	4.86543	0.000370843	up
MS.gene005044	2.52154	0.000373209	up
MS.gene93158	8.96283	0.000373665	up
MS.gene51895	6.28002	0.000373665	up
MS.gene06891	3.51324	0.000375063	up
MS.gene36079	8.81251	0.000377121	up
MS.gene58999	4.86581	0.000378519	up
MS.gene84834	2.51285	0.000378519	up
MS.gene03262	7.02016	0.000379056	up
MS.gene04071	2.74347	0.000382152	up
MS.gene023325	4.36666	0.00038343	up
MS.gene03398	2.48366	0.000385229	up
MS.gene87999	3.31412	0.000386079	up
MS.gene070293	2.58759	0.000386631	up
MS.gene70671	4.88045	0.000386701	up
MS.gene050380	9.06274	0.000386944	up
MS.gene007581	2.83097	0.000388599	up
MS.gene07181	3.76389	0.000390146	up
MS.gene22999	3.30916	0.000390436	up
MS.gene017072	2.91169	0.000392455	up
MS.gene34021	7.90475	0.000392886	up
MS.gene48879	4.62684	0.000393086	up
MS.gene26356	2.28425	0.000393103	up
MS.gene53948	2.17826	0.000393698	up
MS.gene038321	3.51908	0.000393922	up
MS.gene84943	4.83396	0.000394462	up
MS.gene63517	2.43912	0.000394794	up
MS.gene36825	7.12743	0.000395523	up
MS.gene50168	3.36071	0.000396346	up
MS.gene27111	5.52419	0.00039692	up
MS.gene071971	4.63138	0.000398694	up
MS.gene072181	8.91544	0.000399318	up
MS.gene028579	2.09166	0.000399318	up
MS.gene61248	2.71196	0.000399425	up
MS.gene069003	3.82974	0.000400348	up
MS.gene014005	5.69071	0.00040108	up
MS.gene60381	2.59152	0.000401546	up
MS.gene54097	2.31472	0.000402471	up
MS.gene044341	2.38555	0.000403736	up
MS.gene012268	7.37725	0.000404104	up
MS.gene03896	2.76548	0.000404104	up
MS.gene039171	2.89254	0.000406573	up
MS.gene23490	8.23321	0.000408619	up
MS.gene003902	8.39508	0.000410463	up
MS.gene035919	6.10705	0.000412124	up
MS.gene60547	3.46308	0.000413379	up
MS.gene024820	8.23195	0.00041631	up
MS.gene066732	4.02784	0.000417904	up
MS.gene030864	2.65664	0.000420154	up
MS.gene052295	2.45992	0.000423332	up
[truncated: 7,467 more rows]

## Sheet: G4
GeneID	log2FoldChange	Adjust Pvalue	up/down
MS.gene31801	4.6669	3.51436e-71	up
MS.gene046807	4.73112	7.93297e-64	up
MS.gene32362	4.75629	3.49137e-53	up
MS.gene054115	4.61225	9.17563e-50	up
MS.gene87637	3.89998	3.00491e-38	up
MS.gene08076	2.29036	3.26929e-37	up
MS.gene38774	2.72443	1.11904e-33	up
MS.gene57151	3.27378	9.68109e-28	up
MS.gene017979	4.40216	8.55394e-27	up
MS.gene037835	5.18036	3.62311e-24	up
MS.gene027416	4.54279	9.9604e-24	up
MS.gene04131	2.3717	1.73885e-23	up
MS.gene84529	5.47967	3.06973e-22	up
MS.gene04388	5.77803	1.17805e-21	up
MS.gene068670	5.7706	2.96157e-20	up
MS.gene039190	5.60752	2.96157e-20	up
MS.gene074113	6.07609	2.96157e-20	up
MS.gene017772	2.9274	7.14248e-20	up
MS.gene75359	7.41533	9.87009e-20	up
MS.gene47119	6.46606	1.8928e-19	up
MS.gene067308	3.93845	3.61999e-19	up
MS.gene04107	5.76997	7.47429e-19	up
MS.gene04617	4.13226	2.65772e-18	up
MS.gene008800	5.85536	2.69201e-18	up
MS.gene063446	5.65194	3.35111e-18	up
MS.gene008799	5.33093	1.43378e-17	up
MS.gene04366	2.42754	1.59023e-17	up
MS.gene040580	5.31788	1.95605e-17	up
MS.gene014016	2.6897	2.78929e-17	up
MS.gene99928	5.13341	4.00433e-17	up
MS.gene55478	5.64764	4.85846e-17	up
MS.gene051480	4.23405	9.14984e-17	up
MS.gene062834	5.67599	9.2231e-17	up
MS.gene93063	5.87304	1.15077e-16	up
MS.gene055836	3.60794	1.36744e-16	up
MS.gene037580	9.08945	1.99771e-16	up
MS.gene068413	8.58289	2.50666e-16	up
MS.gene54620	4.36745	3.7677e-16	up
MS.gene048798	2.09351	5.88868e-16	up
MS.gene45091	3.80292	6.52333e-16	up
MS.gene59476	4.9972	1.07237e-15	up
MS.gene06976	5.18393	1.19377e-15	up
MS.gene49083	7.92636	1.46492e-15	up
MS.gene39141	2.82522	1.46492e-15	up
MS.gene97976	6.30746	1.4788e-15	up
MS.gene99187	4.3762	1.92531e-15	up
MS.gene08059	5.49255	2.63425e-15	up
MS.gene95744	5.14118	2.63425e-15	up
MS.gene71883	5.83777	6.54639e-15	up
MS.gene84836	3.92949	1.48398e-14	up
MS.gene005496	3.15119	2.07755e-14	up
MS.gene73320	8.0494	3.68086e-14	up
MS.gene29018	5.61134	4.28701e-14	up
MS.gene39996	3.23862	4.38188e-14	up
MS.gene63351	4.61571	4.38307e-14	up
MS.gene072398	3.89182	4.7137e-14	up
MS.gene068423	8.91957	6.06262e-14	up
MS.gene34486	6.18067	1.67438e-13	up
MS.gene070443	3.57198	1.67438e-13	up
MS.gene22981	5.03348	3.68832e-13	up
MS.gene41428	6.29008	3.9914e-13	up
MS.gene056483	6.00143	4.51702e-13	up
MS.gene041364	2.74391	5.69356e-13	up
MS.gene05718	2.35776	5.69356e-13	up
MS.gene043401	3.63535	6.52653e-13	up
MS.gene022850	9.53039	7.50311e-13	up
MS.gene41898	2.57452	8.62664e-13	up
MS.gene049374	4.48272	9.40001e-13	up
MS.gene84723	3.84021	9.97088e-13	up
MS.gene97973	6.48123	1.33842e-12	up
MS.gene53892	2.62157	3.75069e-12	up
MS.gene021682	2.73368	5.50556e-12	up
MS.gene63051	3.12923	7.69556e-12	up
MS.gene046028	4.19419	9.5751e-12	up
MS.gene91617	4.97322	1.00403e-11	up
MS.gene93064	4.53656	1.61051e-11	up
MS.gene62238	4.44599	1.79446e-11	up
MS.gene77513	3.60551	1.87786e-11	up
MS.gene062158	3.24192	1.90032e-11	up
MS.gene59361	8.20266	2.09743e-11	up
MS.gene07326	3.49196	2.24653e-11	up
MS.gene97588	3.69637	2.83257e-11	up
MS.gene28555	6.1267	3.88775e-11	up
MS.gene048249	4.09939	4.11045e-11	up
MS.gene01450	6.50355	4.68507e-11	up
MS.gene073220	5.26883	5.2309e-11	up
MS.gene62240	7.39761	5.31117e-11	up
MS.gene70125	8.35497	5.8284e-11	up
MS.gene033344	8.97829	5.8284e-11	up
MS.gene74749	2.16258	6.30874e-11	up
MS.gene65673	2.42821	7.33862e-11	up
MS.gene033231	5.67474	7.33862e-11	up
MS.gene021811	2.89986	7.89125e-11	up
MS.gene94708	2.30374	9.36859e-11	up
MS.gene034078	4.72603	1.06936e-10	up
MS.gene055706	2.36163	1.06936e-10	up
MS.gene037560	9.91968	1.18989e-10	up
MS.gene006300	5.56191	1.3502e-10	up
MS.gene21522	4.40489	1.52397e-10	up
MS.gene37281	4.60161	1.81749e-10	up
MS.gene008206	4.05663	1.87795e-10	up
MS.gene026758	9.90604	2.0111e-10	up
MS.gene021902	4.83691	2.55599e-10	up
MS.gene068088	2.18005	2.55599e-10	up
MS.gene49758	7.49404	2.74489e-10	up
MS.gene28392	7.5374	2.76305e-10	up
MS.gene05128	2.62261	2.78179e-10	up
MS.gene031564	2.81811	3.26394e-10	up
MS.gene27364	5.87907	3.46825e-10	up
MS.gene73217	5.83981	3.49391e-10	up
MS.gene013000	3.49674	3.75311e-10	up
MS.gene051295	4.73861	4.24474e-10	up
MS.gene61485	5.20703	4.67342e-10	up
MS.gene91301	4.49827	4.89893e-10	up
MS.gene017439	6.95551	5.09354e-10	up
MS.gene09712	4.33743	6.19364e-10	up
MS.gene036230	3.29245	7.10722e-10	up
MS.gene049593	2.47379	7.42132e-10	up
MS.gene053317	5.42156	9.87007e-10	up
MS.gene86824	3.4223	1.05989e-09	up
MS.gene008149	2.57005	1.07376e-09	up
MS.gene95545	4.14393	1.07376e-09	up
MS.gene24338	5.32996	1.22068e-09	up
MS.gene035326	2.18489	1.26223e-09	up
MS.gene63349	4.45972	1.67091e-09	up
MS.gene72150	2.32821	1.94904e-09	up
MS.gene58671	3.99263	2.12157e-09	up
MS.gene45242	3.0235	2.27955e-09	up
MS.gene07920	3.30067	2.52967e-09	up
MS.gene43605	2.96254	3.09684e-09	up
MS.gene76714	6.35996	3.22315e-09	up
MS.gene26130	2.26606	3.26454e-09	up
MS.gene22882	2.02844	3.26454e-09	up
MS.gene49697	3.80341	3.59185e-09	up
MS.gene062159	3.23502	3.81929e-09	up
MS.gene030591	4.71242	3.94637e-09	up
MS.gene034079	4.05894	3.9919e-09	up
MS.gene008893	5.50248	3.9919e-09	up
MS.gene060510	4.53112	4.17442e-09	up
MS.gene81319	6.29037	4.79489e-09	up
MS.gene86607	4.56377	5.27329e-09	up
MS.gene037710	5.49597	5.48888e-09	up
MS.gene062739	5.84454	5.61549e-09	up
MS.gene63017	4.51486	7.84133e-09	up
MS.gene033150	3.49977	9.96118e-09	up
MS.gene06235	2.60071	1.01714e-08	up
MS.gene017774	2.74649	1.1036e-08	up
MS.gene07507	3.12834	1.15632e-08	up
MS.gene60035	9.17609	1.22768e-08	up
MS.gene76713	2.68536	1.28267e-08	up
MS.gene048128	6.25122	1.32527e-08	up
MS.gene020797	6.31682	1.39268e-08	up
MS.gene49902	4.11628	1.39747e-08	up
MS.gene057690	3.09645	1.59284e-08	up
MS.gene005596	6.0156	1.67117e-08	up
MS.gene010691	9.11233	1.74018e-08	up
MS.gene043253	2.8336	1.91041e-08	up
MS.gene48271	8.07021	1.9393e-08	up
MS.gene030404	3.13508	2.0014e-08	up
MS.gene008205	3.37808	2.08775e-08	up
MS.gene81375	2.07	2.37195e-08	up
MS.gene31493	3.88767	2.39211e-08	up
MS.gene58367	2.46389	3.60327e-08	up
MS.gene07756	2.76634	3.73926e-08	up
MS.gene39140	2.00698	3.87925e-08	up
MS.gene00399	4.31646	4.0943e-08	up
MS.gene070646	5.15578	4.55741e-08	up
MS.gene063365	5.82939	4.71942e-08	up
MS.gene63494	2.41223	6.01416e-08	up
MS.gene82221	2.57978	6.03886e-08	up
MS.gene047330	8.61043	6.17899e-08	up
MS.gene023495	6.09281	6.85241e-08	up
MS.gene014344	3.2586	7.03132e-08	up
MS.gene88811	9.12523	7.20688e-08	up
MS.gene030624	8.71672	7.65524e-08	up
MS.gene95029	2.0543	8.0511e-08	up
MS.gene070437	2.47804	8.29738e-08	up
MS.gene35368	4.17495	8.8037e-08	up
MS.gene21687	9.19659	8.89394e-08	up
MS.gene98856	3.71135	8.96816e-08	up
MS.gene035798	2.37891	9.74405e-08	up
MS.gene004680	2.85705	1.02299e-07	up
MS.gene058490	3.58822	1.02444e-07	up
MS.gene02222	2.74498	1.0263e-07	up
MS.gene026642	4.10594	1.02753e-07	up
MS.gene073446	2.74684	1.02798e-07	up
MS.gene74799	2.43386	1.08581e-07	up
MS.gene63297	2.47501	1.17249e-07	up
MS.gene052546	2.68931	1.20917e-07	up
MS.gene76814	4.22791	1.26118e-07	up
MS.gene62184	2.53859	1.26805e-07	up
MS.gene030158	4.23944	1.26805e-07	up
MS.gene060978	3.90734	1.31805e-07	up
MS.gene01243	3.48632	1.61192e-07	up
MS.gene019864	2.48809	1.6317e-07	up
MS.gene62237	3.91855	1.6728e-07	up
MS.gene79579	3.97315	1.74228e-07	up
MS.gene053825	2.77188	1.84867e-07	up
MS.gene013400	4.47396	1.94124e-07	up
MS.gene060274	4.25073	2.03547e-07	up
MS.gene27958	4.24748	2.16116e-07	up
MS.gene83687	4.21532	2.17278e-07	up
MS.gene04897	3.46569	2.25822e-07	up
MS.gene004354	3.32654	2.26026e-07	up
MS.gene06500	4.5414	2.30761e-07	up
MS.gene056482	6.00426	2.54892e-07	up
MS.gene069420	4.80899	2.56769e-07	up
MS.gene26726	6.02213	2.67505e-07	up
MS.gene051771	4.22095	2.83275e-07	up
MS.gene057532	2.52906	3.04025e-07	up
MS.gene035212	2.55926	3.37934e-07	up
MS.gene047409	2.80088	3.41912e-07	up
MS.gene039276	4.10955	3.53735e-07	up
MS.gene64614	2.53806	3.58321e-07	up
MS.gene072602	2.8587	3.66039e-07	up
MS.gene35627	4.85756	3.77716e-07	up
MS.gene045031	3.82517	3.84242e-07	up
MS.gene023273	3.23184	4.00694e-07	up
MS.gene56926	5.21482	4.18579e-07	up
MS.gene06995	2.58093	4.31392e-07	up
MS.gene052278	2.10803	4.40139e-07	up
MS.gene92539	6.22988	4.92447e-07	up
MS.gene78744	3.4527	4.95077e-07	up
MS.gene32196	3.48375	5.03367e-07	up
MS.gene000409	8.71307	5.04278e-07	up
MS.gene49700	2.93506	5.09222e-07	up
MS.gene43085	3.75085	5.25706e-07	up
MS.gene056626	3.62492	5.51541e-07	up
MS.gene015044	3.36069	6.58093e-07	up
MS.gene69435	3.30691	6.58093e-07	up
MS.gene62239	3.53058	7.40595e-07	up
MS.gene012114	2.23781	7.51122e-07	up
MS.gene52654	7.76657	8.22105e-07	up
MS.gene85097	2.34687	8.85985e-07	up
MS.gene92240	7.87249	8.901e-07	up
MS.gene071889	2.98902	9.25766e-07	up
MS.gene27372	2.51485	9.57123e-07	up
MS.gene26075	6.82631	9.97079e-07	up
MS.gene73199	2.3966	1.00077e-06	up
MS.gene74058	2.61268	1.04442e-06	up
MS.gene031385	4.7099	1.04517e-06	up
MS.gene23391	4.95591	1.08726e-06	up
MS.gene037027	2.59137	1.11577e-06	up
MS.gene067916	4.5718	1.12573e-06	up
MS.gene37075	3.83169	1.14987e-06	up
MS.gene08966	5.89529	1.16613e-06	up
MS.gene59612	2.10044	1.19381e-06	up
MS.gene065170	4.54056	1.47103e-06	up
MS.gene025771	3.47338	1.48704e-06	up
MS.gene70963	2.55858	1.57166e-06	up
MS.gene022832	2.82326	1.64987e-06	up
MS.gene04899	5.48812	1.66586e-06	up
MS.gene037028	2.38666	1.67352e-06	up
MS.gene064787	3.86861	1.67355e-06	up
MS.gene072311	8.29108	1.67888e-06	up
MS.gene60356	5.46923	1.80544e-06	up
MS.gene72748	4.26049	1.82756e-06	up
MS.gene82451	4.01199	1.82934e-06	up
MS.gene43907	2.56446	1.83384e-06	up
MS.gene52653	4.5167	2.18693e-06	up
MS.gene88781	2.6771	2.30638e-06	up
MS.gene69326	3.24002	2.33106e-06	up
MS.gene042303	8.0172	2.39981e-06	up
MS.gene44626	5.6704	2.4731e-06	up
MS.gene48390	5.04171	2.49295e-06	up
MS.gene59892	2.59438	2.56251e-06	up
MS.gene008803	2.1629	2.69521e-06	up
MS.gene71622	3.65314	2.78292e-06	up
MS.gene013713	6.54011	2.88885e-06	up
MS.gene87340	5.6226	2.88885e-06	up
MS.gene030228	6.91825	2.95351e-06	up
MS.gene064146	3.69885	3.09576e-06	up
MS.gene04896	4.08542	3.21209e-06	up
MS.gene012839	4.1572	3.29864e-06	up
MS.gene08811	4.62004	3.39003e-06	up
MS.gene40642	3.50694	3.4681e-06	up
MS.gene21941	7.82464	3.63235e-06	up
MS.gene23807	2.09006	3.90316e-06	up
MS.gene045100	2.36667	4.08189e-06	up
MS.gene048219	9.04954	4.20895e-06	up
MS.gene066508	2.78779	4.39227e-06	up
MS.gene96121	2.40585	4.48757e-06	up
MS.gene066597	2.31065	4.5629e-06	up
MS.gene97662	7.31054	4.58765e-06	up
MS.gene017519	2.14062	4.76534e-06	up
MS.gene04898	2.98745	4.92229e-06	up
MS.gene07109	5.09033	4.99625e-06	up
MS.gene055155	4.32237	5.14048e-06	up
MS.gene33139	3.37244	5.22628e-06	up
MS.gene93475	4.62055	5.41529e-06	up
MS.gene50189	2.58015	5.42698e-06	up
MS.gene059867	4.2715	5.47411e-06	up
MS.gene70188	3.09866	5.88692e-06	up
MS.gene054327	2.17552	5.8994e-06	up
MS.gene32842	4.11623	6.25289e-06	up
MS.gene003545	2.8928	6.2752e-06	up
MS.gene36571	3.86893	6.79918e-06	up
MS.gene017380	2.35016	7.10935e-06	up
MS.gene05474	3.40848	7.24998e-06	up
MS.gene32806	2.86494	7.6769e-06	up
MS.gene009882	3.37063	8.01976e-06	up
MS.gene40443	2.19366	8.64648e-06	up
MS.gene041698	2.23785	9.35422e-06	up
MS.gene015374	4.38349	1.07215e-05	up
MS.gene069381	4.53564	1.10613e-05	up
MS.gene044960	2.40569	1.11673e-05	up
MS.gene44950	4.55916	1.14061e-05	up
MS.gene38242	3.6565	1.14236e-05	up
MS.gene53312	6.79325	1.17037e-05	up
MS.gene86911	4.14461	1.17372e-05	up
MS.gene019110	2.66002	1.17372e-05	up
MS.gene069657	2.33104	1.17589e-05	up
MS.gene08165	2.49618	1.20097e-05	up
MS.gene41775	2.33981	1.23828e-05	up
MS.gene066164	5.46644	1.25231e-05	up
MS.gene007941	5.19544	1.25711e-05	up
MS.gene000054	4.57738	1.35303e-05	up
MS.gene063188	2.48358	1.40325e-05	up
MS.gene26783	4.19457	1.47672e-05	up
MS.gene77397	2.09292	1.55257e-05	up
MS.gene27226	2.12577	1.67019e-05	up
MS.gene006227	2.83277	1.69603e-05	up
MS.gene042089	5.08924	1.70062e-05	up
MS.gene20737	3.16899	1.72019e-05	up
MS.gene38702	9.2704	1.73224e-05	up
MS.gene95648	2.36405	1.74129e-05	up
MS.gene57739	4.83751	1.75526e-05	up
MS.gene69372	3.48689	1.85417e-05	up
MS.gene014392	3.26406	2.00218e-05	up
MS.gene073527	4.48023	2.11715e-05	up
MS.gene013646	3.98405	2.18444e-05	up
MS.gene051301	2.14511	2.22163e-05	up
MS.gene031261	2.32651	2.24857e-05	up
MS.gene043368	4.94754	2.25611e-05	up
MS.gene74748	3.87225	2.28712e-05	up
MS.gene60916	6.34896	2.32166e-05	up
MS.gene57009	2.44347	2.36998e-05	up
MS.gene56602	3.04532	2.39642e-05	up
MS.gene37450	3.58621	2.43035e-05	up
MS.gene003836	3.58109	2.47266e-05	up
MS.gene86608	4.23773	2.4959e-05	up
MS.gene79229	2.75545	2.55528e-05	up
MS.gene36448	2.95035	2.61718e-05	up
MS.gene02780	6.67893	2.61994e-05	up
MS.gene032215	2.32132	2.67643e-05	up
MS.gene06857	3.55402	2.67965e-05	up
MS.gene024093	4.46056	2.68117e-05	up
MS.gene072399	5.86038	2.68117e-05	up
MS.gene89264	4.35726	2.6889e-05	up
MS.gene011385	7.80029	2.7501e-05	up
MS.gene056985	2.64057	2.7758e-05	up
MS.gene86455	3.26645	2.7933e-05	up
MS.gene032539	2.51283	2.83156e-05	up
MS.gene011869	5.1165	2.93808e-05	up
MS.gene80949	8.13048	3.01567e-05	up
MS.gene60616	2.87996	3.06694e-05	up
MS.gene38363	7.39575	3.17659e-05	up
MS.gene43299	2.65974	3.17659e-05	up
MS.gene021101	3.45109	3.17659e-05	up
MS.gene71246	5.32417	3.17659e-05	up
MS.gene006744	2.49582	3.29648e-05	up
MS.gene053931	3.13314	3.30688e-05	up
MS.gene88785	2.599	3.35755e-05	up
MS.gene036618	4.4465	3.45051e-05	up
MS.gene89208	7.03097	3.57142e-05	up
MS.gene057208	4.09347	3.67408e-05	up
MS.gene022547	5.54307	3.82152e-05	up
MS.gene036917	3.30815	3.94791e-05	up
MS.gene03838	6.73872	4.01297e-05	up
MS.gene49648	3.38213	4.10138e-05	up
MS.gene22962	2.27273	4.1356e-05	up
MS.gene051275	5.83657	4.38994e-05	up
MS.gene55822	2.84056	4.47495e-05	up
MS.gene01888	3.5013	4.49623e-05	up
MS.gene040499	2.04926	4.54278e-05	up
MS.gene54097	2.34239	4.66104e-05	up
MS.gene028178	3.34452	4.76269e-05	up
MS.gene036812	6.11068	4.80085e-05	up
MS.gene91822	4.21203	4.81074e-05	up
MS.gene025714	2.20842	4.83509e-05	up
MS.gene86508	2.21077	5.01523e-05	up
MS.gene77333	2.58397	5.01523e-05	up
MS.gene81464	2.13351	5.11594e-05	up
MS.gene59297	2.09535	5.1926e-05	up
MS.gene066504	2.04506	5.19837e-05	up
MS.gene003544	2.93073	5.20428e-05	up
MS.gene44242	2.32722	5.28148e-05	up
MS.gene039109	5.24363	5.30093e-05	up
MS.gene82978	2.28927	5.40589e-05	up
MS.gene76929	6.50828	5.49191e-05	up
MS.gene74444	4.23588	5.59062e-05	up
MS.gene045574	2.22956	5.60023e-05	up
MS.gene051769	3.38238	6.02773e-05	up
MS.gene023034	5.29272	6.03028e-05	up
MS.gene02673	4.18514	6.11158e-05	up
MS.gene055157	4.43435	6.15097e-05	up
MS.gene41196	2.29629	6.15567e-05	up
MS.gene013936	2.34445	6.24775e-05	up
MS.gene042968	3.13894	6.28744e-05	up
MS.gene015008	2.7007	6.41558e-05	up
MS.gene02845	2.31017	6.50819e-05	up
MS.gene87852	2.72218	6.58881e-05	up
MS.gene011131	3.85697	6.66993e-05	up
MS.gene80209	3.27993	6.68554e-05	up
MS.gene002499	4.01904	7.1276e-05	up
MS.gene051976	2.81813	7.20012e-05	up
MS.gene44139	2.66914	7.22623e-05	up
MS.gene24395	2.77025	7.28054e-05	up
MS.gene44627	4.73232	7.28054e-05	up
MS.gene49627	2.62561	7.58434e-05	up
MS.gene36453	3.03396	8.22087e-05	up
MS.gene58042	2.49855	8.24805e-05	up
MS.gene072635	2.82565	8.32691e-05	up
MS.gene005813	2.01486	8.35299e-05	up
MS.gene43797	3.19745	8.36603e-05	up
MS.gene067815	2.63443	8.39899e-05	up
MS.gene02510	4.70017	8.51246e-05	up
MS.gene040727	4.23309	8.54306e-05	up
MS.gene03784	7.45435	8.54306e-05	up
MS.gene95242	5.59144	8.56689e-05	up
MS.gene068250	2.57142	9.13394e-05	up
MS.gene93016	2.52764	9.24043e-05	up
MS.gene41186	3.39074	9.85219e-05	up
MS.gene01038	4.69876	9.85774e-05	up
MS.gene65995	3.56165	9.91215e-05	up
MS.gene86321	2.76833	0.000101316	up
MS.gene86613	5.50524	0.000101674	up
MS.gene04618	6.50774	0.000101718	up
MS.gene008204	4.21452	0.000103221	up
MS.gene070015	2.12124	0.000104436	up
MS.gene004256	3.50869	0.000105184	up
MS.gene69183	3.44842	0.000106548	up
MS.gene53487	4.00384	0.000107341	up
MS.gene73062	2.28001	0.000107584	up
MS.gene37417	2.52805	0.00010913	up
MS.gene055752	2.97207	0.000109287	up
MS.gene050340	6.85843	0.000109287	up
MS.gene064788	2.64274	0.000109774	up
MS.gene36345	3.85761	0.00010986	up
MS.gene06643	4.37876	0.000110028	up
MS.gene65668	2.90426	0.000114373	up
MS.gene063021	2.59979	0.000115945	up
MS.gene95693	2.20339	0.000116093	up
MS.gene84207	2.35879	0.000121508	up
MS.gene031332	2.72909	0.000123571	up
MS.gene003570	4.14661	0.000123571	up
MS.gene004053	3.27734	0.000125491	up
MS.gene28713	2.75175	0.000126432	up
MS.gene28229	3.37783	0.000127276	up
MS.gene80742	5.54506	0.000131195	up
MS.gene033536	4.58838	0.000132111	up
MS.gene59431	2.24877	0.000132412	up
MS.gene042699	2.49868	0.000132594	up
MS.gene03745	2.05649	0.000133321	up
MS.gene43802	2.40131	0.000134162	up
MS.gene09279	3.40873	0.000134907	up
MS.gene59243	6.42488	0.000135633	up
MS.gene021602	2.8302	0.000137898	up
MS.gene039468	3.46789	0.000138949	up
MS.gene09021	2.53532	0.000139138	up
MS.gene35117	3.52319	0.000143031	up
MS.gene47470	3.7415	0.000144571	up
MS.gene32011	3.46039	0.000150486	up
MS.gene012906	7.08527	0.000156214	up
MS.gene021102	3.88767	0.000158482	up
MS.gene09777	2.19313	0.000161004	up
MS.gene51911	3.60672	0.000161114	up
MS.gene44893	2.86567	0.000163119	up
MS.gene063742	4.85015	0.000165905	up
MS.gene02626	5.98988	0.000165905	up
MS.gene49157	2.9545	0.000166623	up
MS.gene21633	3.50706	0.000168595	up
MS.gene070080	2.70246	0.000173909	up
MS.gene82222	3.14828	0.000178285	up
MS.gene061729	2.1899	0.000178787	up
MS.gene071688	4.01991	0.000186126	up
MS.gene63629	2.19378	0.000186745	up
MS.gene24924	2.42245	0.000190736	up
MS.gene036269	2.72429	0.000191155	up
MS.gene39502	2.16879	0.000194231	up
MS.gene013213	3.41295	0.000195385	up
MS.gene40833	2.56224	0.000204533	up
MS.gene072016	2.50898	0.000207622	up
MS.gene02478	2.17972	0.000209888	up
MS.gene46061	4.0218	0.000220238	up
MS.gene017775	2.0928	0.000220732	up
MS.gene43424	5.29	0.000221017	up
MS.gene24725	4.45124	0.000225948	up
MS.gene78437	2.72781	0.000227368	up
MS.gene79226	2.10398	0.000230841	up
MS.gene85281	2.17182	0.000234091	up
MS.gene035580	2.06157	0.00023739	up
MS.gene35366	3.24753	0.000241925	up
MS.gene004059	8.1795	0.000241925	up
MS.gene85611	2.95677	0.000249641	up
MS.gene051937	2.23854	0.000256627	up
MS.gene024473	2.84435	0.000259061	up
MS.gene026012	2.32483	0.000260039	up
MS.gene027571	4.37059	0.0002604	up
MS.gene32903	3.80295	0.00026361	up
MS.gene71380	6.91243	0.000264679	up
MS.gene84419	2.15726	0.000288589	up
MS.gene61280	2.73875	0.000290952	up
MS.gene58527	2.96237	0.000294566	up
MS.gene44036	6.58439	0.000309314	up
MS.gene93195	6.27802	0.000320736	up
MS.gene86452	2.26267	0.000320966	up
MS.gene037746	5.7528	0.000323776	up
MS.gene00398	2.73055	0.000328385	up
MS.gene034852	7.05499	0.000328939	up
MS.gene016051	2.95526	0.000328939	up
MS.gene073788	6.04101	0.000328939	up
MS.gene74060	2.62339	0.000330278	up
MS.gene08345	3.05948	0.000331755	up
MS.gene32131	5.4957	0.000331914	up
MS.gene69371	2.73224	0.00034279	up
MS.gene005270	2.58002	0.000344743	up
MS.gene08847	4.44228	0.000349387	up
MS.gene84480	3.31267	0.000349739	up
MS.gene021197	3.92719	0.000349739	up
MS.gene029521	3.58928	0.000351804	up
MS.gene29058	2.17263	0.000351804	up
MS.gene065582	2.91577	0.000354813	up
MS.gene27768	4.75952	0.000355721	up
MS.gene67726	2.32712	0.000357171	up
MS.gene54575	7.13683	0.000360127	up
MS.gene23594	3.81126	0.000360365	up
MS.gene50129	2.55995	0.000368386	up
MS.gene80329	2.89251	0.000369231	up
MS.gene071001	2.21737	0.00037345	up
MS.gene009779	7.24955	0.000374401	up
MS.gene27315	2.19897	0.000381012	up
MS.gene27099	2.62389	0.000393398	up
MS.gene24718	4.67146	0.000393658	up
MS.gene012959	6.5224	0.00040803	up
MS.gene013532	3.54649	0.000416277	up
MS.gene010357	3.84071	0.00041675	up
MS.gene95682	2.6278	0.000422294	up
MS.gene50229	4.22749	0.000428001	up
MS.gene010803	2.10895	0.000428001	up
MS.gene062456	2.59978	0.000429241	up
MS.gene005458	6.26031	0.000433965	up
MS.gene028343	2.57724	0.000433965	up
MS.gene013782	2.40367	0.000436387	up
MS.gene045378	3.10692	0.000436609	up
MS.gene068489	2.43601	0.00043997	up
MS.gene053826	6.84	0.00044064	up
MS.gene26199	3.22241	0.000445642	up
MS.gene002932	3.94358	0.000446852	up
MS.gene75691	6.16409	0.000451601	up
MS.gene33597	2.3578	0.000454426	up
MS.gene95723	2.15821	0.000455644	up
MS.gene56967	3.64309	0.000472031	up
MS.gene064550	2.25591	0.000473649	up
MS.gene032172	2.0107	0.000474843	up
MS.gene010521	2.1001	0.00048103	up
MS.gene51042	2.0854	0.000491556	up
MS.gene015806	4.19174	0.000491556	up
MS.gene27136	3.89538	0.000508064	up
MS.gene54188	2.06704	0.000510103	up
MS.gene30742	2.43742	0.000511791	up
MS.gene009875	2.23338	0.000513506	up
MS.gene012314	6.12485	0.000527857	up
MS.gene015919	2.87281	0.000542914	up
MS.gene052458	2.44722	0.000557159	up
MS.gene79403	3.64321	0.000564491	up
MS.gene79707	2.65915	0.000566427	up
MS.gene63893	2.22671	0.00056665	up
MS.gene062047	2.55711	0.000568125	up
MS.gene031732	2.46947	0.000590642	up
MS.gene065845	6.66128	0.000597506	up
MS.gene018208	5.23265	0.000597506	up
MS.gene022294	4.22207	0.000604391	up
MS.gene056780	2.42108	0.000609446	up
MS.gene35192	3.73743	0.000637514	up
MS.gene22559	4.04284	0.000647195	up
MS.gene01056	2.08984	0.000648589	up
MS.gene025821	2.08475	0.000651171	up
MS.gene08967	5.1101	0.000651614	up
MS.gene31379	2.73384	0.000652895	up
MS.gene85912	4.17755	0.000652895	up
MS.gene022648	3.03247	0.000653738	up
MS.gene057622	2.52854	0.000666805	up
MS.gene063023	2.07149	0.000677412	up
MS.gene92946	3.28414	0.000684204	up
MS.gene51573	3.1231	0.000686081	up
MS.gene006249	2.83538	0.000691772	up
MS.gene77577	6.16712	0.000695888	up
MS.gene28626	2.79565	0.000696219	up
MS.gene011051	4.14944	0.00070823	up
MS.gene40410	3.31262	0.000711428	up
MS.gene82449	2.02814	0.000713697	up
MS.gene77374	2.50681	0.000715219	up
MS.gene99338	2.33847	0.000719737	up
MS.gene036721	2.22843	0.000733139	up
MS.gene021095	6.50821	0.000733856	up
MS.gene64463	2.26344	0.000765214	up
MS.gene49176	3.78205	0.000767226	up
MS.gene039608	2.43316	0.000774969	up
MS.gene032927	2.88126	0.000780572	up
MS.gene87762	4.4451	0.000788029	up
MS.gene021716	3.70818	0.000798119	up
MS.gene68627	2.84329	0.000816352	up
MS.gene71758	2.36717	0.000822321	up
MS.gene89509	3.76069	0.000827222	up
MS.gene052954	2.82438	0.000832751	up
MS.gene028624	2.62042	0.000835216	up
MS.gene004054	2.58276	0.000845209	up
MS.gene72696	3.10687	0.000848776	up
MS.gene28672	3.74483	0.000852361	up
MS.gene026636	4.93204	0.00085286	up
MS.gene06099	2.12467	0.000863886	up
MS.gene64615	4.60071	0.000870363	up
MS.gene040910	3.86371	0.000872279	up
MS.gene055900	3.26853	0.000872279	up
MS.gene00677	2.30456	0.000907415	up
MS.gene06626	2.40263	0.000907415	up
MS.gene39952	2.47673	0.000910507	up
MS.gene23098	3.22497	0.000940022	up
MS.gene011386	6.97619	0.000952985	up
MS.gene074449	2.61791	0.000956214	up
MS.gene35815	5.19554	0.000963218	up
MS.gene55281	4.09807	0.000971714	up
MS.gene023496	5.53439	0.000973597	up
MS.gene06232	3.16716	0.000975674	up
MS.gene061325	2.27412	0.000979606	up
MS.gene073343	2.74265	0.000985279	up
MS.gene55136	5.25117	0.000989744	up
MS.gene77398	7.14008	0.000995501	up
MS.gene000860	5.01968	0.000998701	up
MS.gene55504	5.68796	0.00100774	up
MS.gene066833	3.99945	0.00102475	up
MS.gene23273	3.50811	0.00102762	up
MS.gene81108	3.41619	0.00104612	up
MS.gene50029	2.38219	0.00104632	up
MS.gene33379	2.52186	0.00106277	up
MS.gene06937	3.10332	0.00108536	up
MS.gene98294	3.82437	0.00109129	up
MS.gene76599	3.45194	0.00111531	up
MS.gene94786	3.36868	0.0011911	up
MS.gene067854	2.15036	0.00121009	up
MS.gene049372	3.05242	0.00121328	up
MS.gene29793	3.84924	0.00122046	up
MS.gene004743	6.74082	0.00122713	up
MS.gene010275	3.49692	0.00123552	up
MS.gene026535	3.9799	0.00123589	up
MS.gene030220	6.86997	0.00123589	up
MS.gene30916	5.30282	0.00123645	up
MS.gene061594	4.0289	0.00124707	up
MS.gene35121	3.05912	0.00126153	up
MS.gene82501	3.37879	0.00126315	up
MS.gene77772	2.11913	0.00133074	up
MS.gene83848	2.46134	0.0013344	up
MS.gene030587	2.90381	0.00134597	up
MS.gene048426	3.44363	0.00134597	up
MS.gene47918	3.41506	0.0013535	up
MS.gene21660	5.76648	0.00136602	up
MS.gene057645	2.63431	0.00137715	up
MS.gene014391	2.42335	0.00137715	up
MS.gene79790	2.57084	0.00138171	up
MS.gene030915	3.39161	0.0013922	up
MS.gene064062	2.08867	0.00139382	up
MS.gene056073	2.71493	0.00139559	up
MS.gene036994	2.13905	0.00139922	up
MS.gene012268	4.89786	0.00140505	up
MS.gene056361	4.92467	0.00140621	up
MS.gene011814	2.82925	0.00141691	up
MS.gene21661	5.71129	0.00142812	up
MS.gene025539	2.17993	0.00143021	up
MS.gene60696	3.65688	0.00143506	up
MS.gene073704	3.51344	0.00145363	up
MS.gene073239	2.27159	0.00147278	up
MS.gene032748	2.35867	0.00149052	up
MS.gene50169	2.23453	0.00151382	up
MS.gene08200	2.59427	0.00151382	up
MS.gene057392	2.12308	0.00153398	up
MS.gene49209	4.09774	0.00154776	up
MS.gene67535	2.36876	0.00156865	up
MS.gene51065	2.53114	0.00157595	up
MS.gene001359	4.67429	0.00158231	up
MS.gene63905	3.57956	0.00164344	up
MS.gene051226	3.59456	0.00164441	up
MS.gene002485	2.00213	0.00165166	up
MS.gene048793	3.32922	0.00167022	up
MS.gene08532	2.48933	0.00168707	up
MS.gene74852	6.19151	0.0017074	up
MS.gene032263	2.63129	0.0017074	up
MS.gene006775	2.87792	0.0017159	up
MS.gene012407	5.72353	0.00172729	up
MS.gene48831	2.48235	0.00173206	up
MS.gene70138	3.29055	0.00173697	up
MS.gene026671	5.04497	0.00178686	up
MS.gene63964	2.05678	0.0018398	up
MS.gene021731	2.62963	0.00184564	up
MS.gene026723	4.6347	0.0018587	up
MS.gene88914	3.93388	0.00186145	up
MS.gene25705	3.31559	0.00186145	up
MS.gene93505	4.84138	0.00187856	up
MS.gene063747	6.39539	0.00188693	up
MS.gene026612	2.61553	0.00188835	up
MS.gene035257	2.03155	0.0018911	up
MS.gene94837	3.5907	0.00189708	up
MS.gene89609	2.05101	0.00189768	up
MS.gene50774	2.40778	0.00195184	up
MS.gene92508	4.51825	0.00196519	up
MS.gene072721	2.01928	0.00200689	up
MS.gene063478	2.51354	0.00201502	up
MS.gene73669	6.61047	0.00202614	up
MS.gene63052	5.56408	0.00203239	up
MS.gene066621	4.35801	0.00203651	up
MS.gene048332	2.797	0.00205291	up
MS.gene44899	2.15164	0.0020571	up
MS.gene98721	2.34321	0.00207338	up
MS.gene028666	2.33911	0.00208826	up
MS.gene010243	4.31367	0.00208826	up
MS.gene030127	2.64652	0.00208826	up
MS.gene014017	2.66235	0.00208933	up
MS.gene30654	2.10308	0.00208933	up
MS.gene47380	6.3632	0.00211419	up
MS.gene88946	3.16881	0.00212059	up
MS.gene055753	3.11296	0.00212886	up
MS.gene071741	2.09595	0.00214498	up
MS.gene002264	2.72924	0.00215671	up
MS.gene30851	3.4568	0.0021618	up
MS.gene64665	2.58267	0.0021655	up
MS.gene41185	2.55899	0.00218108	up
MS.gene024680	5.80989	0.00221474	up
MS.gene91478	3.35633	0.00221819	up
MS.gene29450	4.61528	0.00223194	up
MS.gene051829	6.06974	0.00226633	up
MS.gene040057	3.84887	0.00227468	up
MS.gene08493	3.96956	0.00228301	up
MS.gene034495	3.8522	0.00234037	up
MS.gene008207	2.42275	0.00234037	up
MS.gene22342	3.44047	0.00235783	up
MS.gene049182	2.49278	0.00236981	up
MS.gene014867	5.29593	0.00239806	up
MS.gene041339	5.22735	0.00241251	up
MS.gene81290	3.91878	0.00245744	up
MS.gene01472	4.47831	0.00246329	up
MS.gene70222	5.75536	0.00247668	up
MS.gene44046	2.01506	0.002477	up
MS.gene30902	4.6451	0.00255972	up
MS.gene073347	2.02009	0.00256492	up
MS.gene76933	5.85788	0.00256492	up
MS.gene82536	2.24672	0.00257069	up
MS.gene60157	2.52978	0.00258812	up
MS.gene32722	3.27381	0.00259266	up
MS.gene057024	2.22972	0.00268281	up
MS.gene30634	2.07366	0.00271586	up
MS.gene012149	2.95277	0.00274266	up
MS.gene50285	2.1076	0.0027493	up
MS.gene83073	3.63984	0.00277461	up
MS.gene014382	2.96489	0.00277639	up
MS.gene41626	3.29075	0.00278257	up
MS.gene22312	6.06114	0.00279546	up
MS.gene001826	2.50112	0.00279859	up
MS.gene29370	3.72326	0.00287382	up
MS.gene63577	3.28263	0.00288545	up
MS.gene32444	3.21395	0.00292565	up
MS.gene028338	2.8785	0.00292596	up
MS.gene054446	3.30319	0.00296345	up
MS.gene038807	6.53963	0.00296774	up
MS.gene013162	2.6111	0.00297482	up
MS.gene057691	2.19849	0.00302063	up
MS.gene067788	2.34012	0.00305398	up
MS.gene048881	4.63994	0.00313983	up
MS.gene71197	4.10865	0.00319648	up
MS.gene37519	2.42937	0.00323631	up
MS.gene034956	5.89466	0.00325557	up
MS.gene44420	6.6708	0.00327451	up
MS.gene52078	3.39498	0.00332596	up
MS.gene27840	2.06545	0.00332781	up
MS.gene82500	5.81182	0.0033319	up
MS.gene031472	2.81536	0.0033645	up
MS.gene017972	2.12886	0.00336469	up
MS.gene028928	4.10722	0.00342257	up
MS.gene002471	5.71355	0.00344578	up
MS.gene031689	2.07089	0.00350136	up
MS.gene034080	4.49683	0.00361101	up
MS.gene42091	4.13138	0.00361306	up
MS.gene90121	3.31623	0.0037004	up
MS.gene05548	2.72701	0.00372489	up
MS.gene066195	3.38527	0.00372803	up
MS.gene007247	5.9208	0.00376561	up
MS.gene37796	2.67958	0.00398209	up
MS.gene07110	4.98527	0.00399025	up
MS.gene065185	2.38794	0.00400739	up
MS.gene039171	2.24775	0.00403437	up
MS.gene52770	4.02715	0.00404024	up
MS.gene44812	2.26037	0.00409037	up
MS.gene048311	2.99336	0.00409743	up
MS.gene047681	5.8232	0.00409776	up
MS.gene43594	2.31582	0.00412689	up
MS.gene61599	2.64474	0.00414052	up
MS.gene057153	5.65278	0.0041441	up
MS.gene94257	5.50897	0.00418651	up
MS.gene64493	2.55888	0.00422705	up
MS.gene35563	3.97297	0.00424974	up
MS.gene012310	2.91864	0.00435283	up
MS.gene047571	4.46202	0.00436061	up
MS.gene85188	5.66345	0.00437862	up
MS.gene007940	3.61784	0.00445127	up
MS.gene56784	2.25713	0.00452531	up
MS.gene063427	2.72559	0.00453789	up
MS.gene50168	2.48317	0.00467463	up
MS.gene067188	2.23531	0.0046958	up
MS.gene060503	2.29915	0.00470514	up
MS.gene030707	3.0379	0.00475241	up
MS.gene60168	2.60029	0.00476116	up
MS.gene044464	2.26923	0.00476117	up
MS.gene83611	4.27154	0.00478625	up
MS.gene024362	4.78209	0.00484572	up
MS.gene016682	4.68748	0.00485457	up
MS.gene99206	2.82936	0.00486499	up
MS.gene066423	3.27882	0.00487563	up
MS.gene050334	2.71241	0.00487632	up
MS.gene02654	2.15071	0.00496116	up
MS.gene94259	4.28908	0.00496116	up
MS.gene002734	3.62544	0.00496518	up
MS.gene073578	2.09126	0.00497667	up
MS.gene051329	2.36727	0.00498829	up
MS.gene98661	4.8939	0.00503655	up
MS.gene068457	2.14959	0.00513769	up
MS.gene09833	3.01649	0.00515419	up
MS.gene025103	2.59486	0.00521733	up
MS.gene00427	2.03452	0.00526047	up
MS.gene042777	2.14617	0.00533861	up
MS.gene22550	6.97373	0.00539399	up
MS.gene054445	5.60578	0.0054185	up
MS.gene28706	4.53121	0.00546987	up
MS.gene22593	2.87013	0.00547451	up
MS.gene008032	2.11923	0.00548344	up
MS.gene047354	5.59418	0.00550292	up
MS.gene007145	4.64502	0.00550372	up
MS.gene063129	2.09093	0.00557991	up
MS.gene08164	2.71283	0.00560818	up
MS.gene20354	2.48084	0.00563061	up
MS.gene25192	3.29907	0.00564534	up
MS.gene47966	4.36268	0.00568039	up
MS.gene063746	6.13357	0.005737	up
MS.gene78414	2.03551	0.00574713	up
MS.gene32563	2.87822	0.00577216	up
MS.gene21581	2.31289	0.00583508	up
MS.gene073187	2.10845	0.00586453	up
MS.gene60690	2.63626	0.00592024	up
MS.gene30737	4.28613	0.00592024	up
MS.gene025337	2.06531	0.00592084	up
MS.gene052922	6.43771	0.00595342	up
MS.gene047303	5.32364	0.00596229	up
MS.gene29260	2.19769	0.00597914	up
MS.gene98068	2.20972	0.0060669	up
MS.gene022896	5.41904	0.00610978	up
MS.gene62692	2.14733	0.00613011	up
MS.gene99469	2.17142	0.006209	up
MS.gene49835	4.50742	0.00631237	up
MS.gene033287	2.43127	0.00631959	up
MS.gene91482	5.3185	0.00631979	up
MS.gene027345	4.68531	0.00633265	up
MS.gene88346	2.09525	0.00633725	up
MS.gene34246	2.13445	0.00640892	up
MS.gene074485	3.46995	0.00649211	up
MS.gene55135	2.24338	0.00649732	up
MS.gene31719	2.83649	0.0065215	up
MS.gene041435	5.18994	0.00657328	up
MS.gene066970	2.35484	0.00662084	up
MS.gene23067	2.168	0.00666659	up
MS.gene49246	2.51874	0.00672759	up
MS.gene059575	2.11442	0.00681665	up
MS.gene023680	2.18563	0.00701458	up
MS.gene23514	2.32822	0.00701458	up
MS.gene020523	5.89453	0.00707311	up
MS.gene56460	2.74133	0.00708172	up
MS.gene71278	5.06172	0.00717024	up
MS.gene048867	2.89722	0.00727976	up
MS.gene011669	7.17484	0.0072945	up
MS.gene73755	2.25221	0.00734229	up
MS.gene064837	2.69096	0.00734444	up
MS.gene030539	2.0989	0.00737323	up
MS.gene81071	2.26936	0.00738398	up
MS.gene43935	3.80931	0.00741592	up
MS.gene35562	4.14806	0.00741592	up
MS.gene40863	2.5736	0.00743124	up
MS.gene72353	2.51285	0.00743322	up
MS.gene032573	2.87229	0.00753709	up
MS.gene52814	4.84075	0.00756027	up
MS.gene81569	4.92069	0.00756415	up
MS.gene45534	5.41826	0.00757544	up
MS.gene028718	3.07559	0.00762275	up
MS.gene058840	2.84369	0.00767171	up
MS.gene069557	2.48459	0.00767171	up
MS.gene84094	3.92273	0.00769299	up
MS.gene28553	2.12964	0.00772453	up
MS.gene75085	2.00108	0.00773224	up
MS.gene79876	2.48982	0.0077969	up
MS.gene074093	2.35743	0.00781121	up
MS.gene57131	3.31489	0.00783898	up
MS.gene43236	5.10411	0.00786169	up
MS.gene31290	5.41889	0.00795937	up
MS.gene56095	3.27402	0.00800672	up
MS.gene039840	2.81973	0.00801499	up
MS.gene056502	2.1623	0.00808631	up
MS.gene99208	3.21969	0.00811288	up
MS.gene25007	3.40833	0.00811606	up
MS.gene002723	7.16707	0.00822358	up
MS.gene004061	3.22206	0.00825691	up
MS.gene037151	2.66219	0.008285	up
MS.gene56911	2.1153	0.00831074	up
MS.gene60595	2.48561	0.00835727	up
MS.gene067247	2.39396	0.00838013	up
MS.gene063532	4.58358	0.00838224	up
MS.gene92975	3.94041	0.00840086	up
MS.gene025738	2.67802	0.00843692	up
MS.gene01064	5.02312	0.00844213	up
MS.gene54708	3.48417	0.00845454	up
MS.gene98962	2.6125	0.0085749	up
MS.gene28009	2.65765	0.00861902	up
MS.gene040147	6.0668	0.00863256	up
MS.gene011872	2.01878	0.00863928	up
MS.gene88342	2.71103	0.0086461	up
MS.gene62468	2.31399	0.00866369	up
MS.gene97913	3.30541	0.00871207	up
MS.gene82342	3.77993	0.00882271	up
MS.gene50275	2.01738	0.00884835	up
MS.gene047631	2.78836	0.00887917	up
MS.gene019411	2.17533	0.0088801	up
MS.gene35889	3.60909	0.00890491	up
MS.gene36456	4.66113	0.00891007	up
MS.gene65034	2.13724	0.00896705	up
MS.gene43592	2.53668	0.00901231	up
MS.gene37957	4.89486	0.00910336	up
MS.gene92072	2.80053	0.00917292	up
MS.gene053405	3.04629	0.00933228	up
MS.gene52590	2.34445	0.00934441	up
MS.gene008983	3.42877	0.0094634	up
MS.gene01396	5.33254	0.00950604	up
MS.gene31790	2.16205	0.00951172	up
MS.gene051083	2.12872	0.00954998	up
MS.gene045964	2.31343	0.00961917	up
MS.gene95310	2.17085	0.00962131	up
MS.gene025902	2.7394	0.00962769	up
MS.gene026120	2.66117	0.00967628	up
MS.gene073771	2.43938	0.00971444	up
MS.gene74445	2.45709	0.00972604	up
MS.gene046780	2.18829	0.00980135	up
MS.gene057772	5.22656	0.0098644	up
MS.gene98967	3.31604	0.010016	up
MS.gene003123	4.60827	0.0100236	up
MS.gene25962	3.18968	0.0100985	up
MS.gene062736	4.79695	0.0101368	up
MS.gene71730	2.41786	0.0101681	up
MS.gene37404	2.1111	0.0102514	up
MS.gene76706	5.51477	0.0103299	up
MS.gene72902	5.16325	0.0104304	up
MS.gene047970	5.20408	0.0104507	up
MS.gene022346	2.39451	0.0106356	up
MS.gene42873	5.6958	0.0106711	up
MS.gene44238	4.80917	0.0106763	up
MS.gene50167	3.14303	0.0106993	up
MS.gene045443	6.18738	0.0107004	up
MS.gene95893	5.36851	0.0107627	up
MS.gene74797	4.40264	0.0108657	up
MS.gene33867	2.32867	0.0109098	up
MS.gene28708	3.71634	0.0109179	up
MS.gene031331	2.34226	0.0110115	up
MS.gene003184	2.09598	0.0110197	up
MS.gene24282	2.18592	0.0110361	up
MS.gene92639	2.42473	0.0111102	up
MS.gene065302	4.78478	0.011154	up
MS.gene36866	3.00042	0.0112157	up
MS.gene33718	2.01596	0.0112439	up
MS.gene07708	5.79525	0.0112689	up
MS.gene48297	2.30383	0.0113231	up
MS.gene89156	2.04563	0.0113423	up
MS.gene74402	3.23374	0.0113423	up
MS.gene42800	2.36221	0.0114053	up
MS.gene035695	5.67052	0.0114276	up
MS.gene23619	2.04259	0.0114362	up
MS.gene043504	2.67906	0.0114461	up
MS.gene46020	4.40765	0.0114764	up
MS.gene65672	4.48262	0.0114925	up
MS.gene003568	6.32526	0.0116221	up
MS.gene04959	3.07038	0.0117489	up
MS.gene57351	2.69269	0.0117634	up
MS.gene057148	5.39357	0.0117634	up
MS.gene001146	2.16723	0.0117973	up
MS.gene51624	2.77872	0.0117999	up
MS.gene010203	3.78187	0.0118426	up
MS.gene004970	3.58139	0.0119876	up
MS.gene003402	2.33344	0.0119876	up
MS.gene82799	2.15135	0.0119876	up
MS.gene42544	3.39508	0.0119989	up
MS.gene51591	4.69066	0.0120227	up
MS.gene070081	4.65958	0.0120792	up
MS.gene030098	3.85268	0.0120946	up
MS.gene88977	3.32952	0.0121213	up
MS.gene027453	2.24044	0.0122054	up
MS.gene73790	2.59919	0.0122929	up
MS.gene064841	2.16418	0.0122945	up
MS.gene069187	2.27208	0.0124492	up
MS.gene09112	2.07543	0.0124658	up
MS.gene08491	2.63991	0.01248	up
MS.gene026541	2.57711	0.0124875	up
MS.gene006822	5.45217	0.0125213	up
MS.gene86507	3.04858	0.0125394	up
MS.gene21792	2.48058	0.0125774	up
MS.gene55137	2.46036	0.0126115	up
MS.gene62467	2.09334	0.0126115	up
MS.gene01451	2.79491	0.0126363	up
MS.gene85350	2.06921	0.012642	up
MS.gene057096	2.05032	0.0126523	up
MS.gene23957	2.31531	0.0126801	up
MS.gene58652	2.94232	0.012692	up
MS.gene005169	4.59292	0.0127994	up
MS.gene01247	2.22998	0.0130197	up
MS.gene043948	4.14819	0.0131341	up
MS.gene055511	2.41695	0.0131553	up
MS.gene32097	3.90144	0.0131714	up
MS.gene73267	2.09397	0.0133503	up
MS.gene73985	5.23952	0.0133991	up
MS.gene058000	2.20467	0.0134117	up
MS.gene057409	2.4658	0.0134137	up
MS.gene80526	2.50012	0.0134469	up
MS.gene062549	2.005	0.0134715	up
MS.gene03262	2.63388	0.013511	up
MS.gene44915	2.34436	0.0135564	up
MS.gene035947	3.03981	0.0136087	up
MS.gene028817	2.80708	0.0136983	up
MS.gene26774	2.55218	0.013803	up
MS.gene014537	3.65424	0.013803	up
MS.gene79568	2.32719	0.0138552	up
MS.gene064931	2.72565	0.013978	up
MS.gene066431	2.41592	0.0140055	up
MS.gene74259	3.30662	0.0141368	up
MS.gene61414	2.33431	0.0141621	up
MS.gene69234	2.26075	0.0142778	up
MS.gene20870	2.523	0.0143085	up
MS.gene044087	3.48523	0.0143085	up
MS.gene002377	2.43848	0.0143908	up
MS.gene063881	2.18054	0.0144231	up
MS.gene08166	2.30911	0.0144231	up
MS.gene047510	2.65348	0.01447	up
MS.gene030155	2.17968	0.0144787	up
MS.gene047331	3.05309	0.0144949	up
MS.gene048762	3.80416	0.0146441	up
MS.gene20414	2.38833	0.0146685	up
MS.gene34008	2.13702	0.0147972	up
MS.gene82976	2.26437	0.0147972	up
MS.gene022992	2.05585	0.0147972	up
MS.gene005006	4.69311	0.0148497	up
MS.gene012118	3.0275	0.0149846	up
MS.gene026288	2.43734	0.0150204	up
MS.gene067531	2.72606	0.015065	up
MS.gene46072	2.15505	0.0151159	up
MS.gene20603	3.02525	0.0151618	up
MS.gene29744	2.28626	0.0152559	up
MS.gene67606	4.73671	0.0153525	up
MS.gene042861	2.16943	0.0153525	up
MS.gene045301	5.49242	0.0153871	up
MS.gene049951	2.27172	0.0154478	up
MS.gene82214	5.32703	0.0155878	up
MS.gene09026	2.05081	0.0156068	up
MS.gene52081	2.07757	0.0156607	up
MS.gene00839	3.65297	0.0156914	up
MS.gene34090	5.12892	0.0156942	up
MS.gene003739	3.77715	0.0157301	up
MS.gene072763	4.18698	0.0157476	up
MS.gene045648	3.77985	0.0157533	up
MS.gene053567	4.63616	0.0158831	up
MS.gene22710	4.48746	0.015949	up
MS.gene064681	2.36579	0.0159729	up
MS.gene046484	2.11835	0.0160643	up
MS.gene84478	2.11899	0.0161299	up
MS.gene89326	2.60962	0.0161938	up
MS.gene05868	2.16038	0.0162669	up
MS.gene060024	7.44973	0.0163062	up
MS.gene77488	5.89656	0.0163519	up
MS.gene28709	2.15071	0.0163789	up
MS.gene000818	2.02782	0.0164688	up
MS.gene61097	5.69202	0.0164835	up
MS.gene04684	2.01496	0.016617	up
MS.gene81918	3.64907	0.0166426	up
MS.gene42146	3.99064	0.0166692	up
MS.gene01063	2.66675	0.0166862	up
MS.gene01880	2.29676	0.0167115	up
MS.gene070482	3.50651	0.0167269	up
MS.gene035612	3.23819	0.016766	up
MS.gene44949	3.99955	0.0167946	up
MS.gene80821	4.43745	0.0167956	up
MS.gene96237	2.92552	0.0168952	up
MS.gene016154	4.94694	0.0169941	up
MS.gene059822	2.1431	0.017017	up
MS.gene42086	2.46023	0.0171259	up
MS.gene85959	2.3954	0.0171943	up
MS.gene67381	2.74359	0.0172456	up
MS.gene028335	4.07749	0.0172716	up
MS.gene052699	2.86514	0.0174184	up
MS.gene49133	2.90629	0.0175407	up
MS.gene041593	3.65027	0.0176309	up
MS.gene033850	2.71603	0.0177457	up
MS.gene028875	3.44949	0.0178521	up
MS.gene06945	2.76041	0.0178521	up
MS.gene071042	2.24781	0.0178742	up
MS.gene033113	3.9525	0.017883	up
MS.gene011326	2.27735	0.0178907	up
MS.gene71882	5.29351	0.017892	up
MS.gene014136	3.33881	0.0180467	up
MS.gene062268	4.17479	0.0181975	up
MS.gene054892	3.26941	0.0183219	up
MS.gene072714	3.09645	0.0183241	up
MS.gene045454	3.83189	0.0185456	up
MS.gene010101	2.62314	0.0185849	up
MS.gene070232	2.44527	0.0186649	up
MS.gene060387	2.12646	0.0186649	up
MS.gene010495	4.85577	0.0187079	up
MS.gene87783	2.13342	0.0189405	up
MS.gene79327	4.26563	0.0190317	up
MS.gene46846	3.0767	0.0190343	up
MS.gene063833	2.20956	0.0191675	up
MS.gene31859	5.42755	0.0191827	up
MS.gene20610	2.13833	0.0192872	up
MS.gene057422	2.27502	0.0193779	up
MS.gene75363	2.57591	0.0193824	up
MS.gene67590	4.48127	0.0194894	up
MS.gene86599	2.61485	0.0196267	up
MS.gene070637	2.186	0.0196468	up
MS.gene063690	2.587	0.0196468	up
MS.gene24614	3.29338	0.0197885	up
MS.gene57604	5.24786	0.0198598	up
MS.gene39213	2.40909	0.0198996	up
MS.gene016512	2.95916	0.0202972	up
MS.gene034413	2.83567	0.0203166	up
MS.gene012791	3.64766	0.0203651	up
MS.gene28150	4.3494	0.0203721	up
MS.gene06372	3.73283	0.0203741	up
MS.gene81359	3.94636	0.0203771	up
MS.gene30633	2.73407	0.0203964	up
MS.gene48334	2.43419	0.0207187	up
MS.gene28299	2.93235	0.0207376	up
MS.gene30929	2.43223	0.0208605	up
MS.gene46128	2.10899	0.0209219	up
MS.gene24620	4.05994	0.0209613	up
MS.gene024993	7.22556	0.0210212	up
MS.gene27996	2.03763	0.0210475	up
MS.gene87049	2.56182	0.0210757	up
MS.gene052016	3.17624	0.0210766	up
MS.gene043470	2.24088	0.0211462	up
MS.gene99203	2.50182	0.0211685	up
MS.gene000113	4.53646	0.021212	up
MS.gene011868	3.73366	0.021292	up
MS.gene91431	4.33515	0.0213044	up
MS.gene46339	4.39645	0.0213142	up
MS.gene031945	2.39092	0.0213205	up
MS.gene040788	2.9643	0.0213914	up
MS.gene004322	2.28768	0.0214054	up
MS.gene009452	2.60253	0.0214713	up
MS.gene039838	2.36556	0.0214844	up
MS.gene023423	3.6929	0.0216778	up
MS.gene011303	2.32597	0.0217386	up
MS.gene81051	2.66395	0.0217822	up
MS.gene030415	3.78034	0.0222885	up
MS.gene00993	3.29142	0.0223292	up
MS.gene031025	2.57534	0.0223883	up
MS.gene046483	2.70291	0.0223923	up
MS.gene050928	2.54945	0.0224903	up
MS.gene83432	3.72534	0.0225275	up
MS.gene07902	4.57692	0.0225409	up
MS.gene069178	2.8831	0.0225654	up
MS.gene013515	2.31634	0.0225992	up
MS.gene59624	2.24606	0.0227329	up
MS.gene07632	5.55778	0.0227573	up
MS.gene015544	2.43212	0.0227661	up
MS.gene01287	2.78256	0.0228144	up
MS.gene83079	2.25379	0.0228821	up
MS.gene007146	3.36539	0.0228821	up
MS.gene053631	2.54468	0.022913	up
MS.gene046381	2.6033	0.0229199	up
MS.gene053602	4.99342	0.0232554	up
MS.gene034132	2.40455	0.0233701	up
MS.gene96832	2.20331	0.0234278	up
MS.gene88665	4.90722	0.0235509	up
MS.gene46998	2.97832	0.0236956	up
MS.gene039607	2.14428	0.0238297	up
MS.gene044071	4.59613	0.0238361	up
MS.gene67311	2.73046	0.023844	up
MS.gene26363	3.74286	0.0239056	up
MS.gene47146	2.20667	0.0239111	up
MS.gene061227	2.08457	0.0240192	up
MS.gene025273	2.27491	0.0240314	up
MS.gene27019	3.80705	0.024087	up
MS.gene25093	3.00863	0.0244673	up
MS.gene054717	2.38223	0.0245515	up
MS.gene31689	2.71004	0.0246724	up
MS.gene066248	4.54358	0.0246871	up
MS.gene21012	5.88495	0.0247009	up
MS.gene01908	4.39231	0.0247686	up
MS.gene73572	2.01357	0.0249427	up
MS.gene07711	5.80517	0.0252383	up
MS.gene52645	2.46774	0.0252695	up
MS.gene013008	2.95901	0.0253538	up
MS.gene37029	2.36245	0.0254808	up
MS.gene007814	2.13667	0.025512	up
MS.gene85169	2.15779	0.0256545	up
MS.gene23679	3.50879	0.0257274	up
MS.gene063083	4.21056	0.0258417	up
MS.gene47144	2.2838	0.0258417	up
MS.gene041565	4.71012	0.0259511	up
MS.gene42288	3.94541	0.0260846	up
MS.gene48568	2.55158	0.0261072	up
MS.gene07550	5.16285	0.0261332	up
MS.gene049391	2.24747	0.0263461	up
MS.gene54703	2.08447	0.0264024	up
MS.gene022713	5.99907	0.0266968	up
MS.gene050761	2.63606	0.026838	up
MS.gene07133	3.11845	0.0269104	up
MS.gene09773	3.20714	0.027155	up
MS.gene034920	2.03541	0.0271662	up
MS.gene78432	2.16208	0.0271662	up
MS.gene000547	2.79966	0.0275775	up
MS.gene020509	5.37599	0.0277204	up
MS.gene012605	2.7138	0.0279632	up
MS.gene79084	4.33617	0.0280216	up
MS.gene005502	2.22247	0.0281919	up
MS.gene028179	4.35359	0.0283357	up
MS.gene67245	2.23908	0.0283985	up
MS.gene047632	3.10865	0.0284164	up
MS.gene011176	3.13244	0.0285046	up
MS.gene034919	2.04797	0.0285111	up
MS.gene027542	5.06807	0.0286249	up
MS.gene007839	4.17043	0.0286952	up
MS.gene030218	4.43809	0.028717	up
MS.gene54237	2.15626	0.0287325	up
MS.gene45515	2.12879	0.0288497	up
MS.gene052907	3.04245	0.0289901	up
MS.gene006747	2.39227	0.0291068	up
MS.gene072825	6.37444	0.029164	up
MS.gene57124	2.21503	0.02944	up
MS.gene023201	4.94868	0.0296186	up
MS.gene069318	2.31551	0.0297816	up
MS.gene56524	3.51302	0.029797	up
MS.gene052007	3.29675	0.0298962	up
MS.gene64667	2.20238	0.0301629	up
MS.gene50170	2.32967	0.030195	up
MS.gene51300	2.76765	0.0304187	up
MS.gene06617	3.34374	0.0307087	up
MS.gene58055	4.32493	0.0308876	up
MS.gene022909	4.30936	0.0308876	up
MS.gene057697	2.39591	0.0310038	up
MS.gene38012	2.22307	0.0312912	up
MS.gene95622	4.77265	0.0312912	up
MS.gene036674	2.09316	0.0314495	up
MS.gene96344	2.47475	0.0314495	up
MS.gene058527	2.88432	0.0314495	up
MS.gene42656	2.61738	0.031568	up
MS.gene030278	3.32868	0.0318241	up
MS.gene48521	2.21521	0.0318596	up
MS.gene23784	4.65816	0.0319773	up
MS.gene05869	2.7215	0.0321808	up
MS.gene016424	2.61809	0.0323131	up
MS.gene035652	2.51593	0.0325111	up
MS.gene070408	2.20105	0.0327593	up
MS.gene22319	2.9544	0.0327593	up
MS.gene28074	2.07234	0.0327593	up
MS.gene34516	2.26827	0.0327593	up
MS.gene36554	2.0071	0.0327593	up
MS.gene038103	2.73914	0.0328073	up
MS.gene35217	2.31064	0.0328674	up
MS.gene049281	2.58352	0.0329219	up
MS.gene056445	3.78951	0.0329376	up
MS.gene053641	2.44274	0.0331288	up
MS.gene037141	2.18565	0.033129	up
MS.gene21328	2.13792	0.0333714	up
MS.gene010242	3.51623	0.0333866	up
MS.gene002462	2.06566	0.0337304	up
MS.gene63379	3.38643	0.0337541	up
MS.gene99058	3.10017	0.0338046	up
MS.gene61281	2.26114	0.0338973	up
MS.gene38598	5.23549	0.0339821	up
MS.gene040442	2.63314	0.0339861	up
MS.gene015512	2.34818	0.0340203	up
MS.gene017914	2.52552	0.0340473	up
MS.gene43097	4.15266	0.0341288	up
MS.gene39468	4.42874	0.0342124	up
MS.gene30938	2.06761	0.0342818	up
MS.gene00667	2.17162	0.034644	up
MS.gene008390	2.18611	0.0346681	up
MS.gene58072	3.15329	0.0347119	up
MS.gene073306	2.32319	0.03483	up
MS.gene022751	2.66972	0.0351171	up
MS.gene61544	2.11368	0.035124	up
MS.gene019866	4.40145	0.0352336	up
MS.gene29794	4.37297	0.0352465	up
MS.gene83394	4.82321	0.0352838	up
MS.gene60156	2.53236	0.0353773	up
MS.gene22411	2.25197	0.0355239	up
MS.gene78691	3.14165	0.0355335	up
MS.gene46064	2.06752	0.0355678	up
MS.gene98295	3.44589	0.0357545	up
MS.gene050619	3.49412	0.0358434	up
MS.gene21520	3.99935	0.0359659	up
MS.gene064726	3.84045	0.0360826	up
MS.gene065653	4.33199	0.0361023	up
MS.gene25197	2.22554	0.0361023	up
MS.gene016642	2.47563	0.0361456	up
MS.gene37302	4.4339	0.0362165	up
MS.gene53265	2.88612	0.0362256	up
MS.gene36455	6.64821	0.0362409	up
MS.gene06026	2.57366	0.0365918	up
MS.gene050189	2.25412	0.0366611	up
MS.gene08468	5.02398	0.0367373	up
MS.gene045043	2.05793	0.0368134	up
MS.gene82384	2.59163	0.0370371	up
MS.gene006886	2.03487	0.0370971	up
MS.gene035919	2.63232	0.0373724	up
MS.gene007864	4.16787	0.0375469	up
MS.gene070483	2.445	0.0375514	up
MS.gene24294	2.81392	0.0379282	up
MS.gene047407	4.10369	0.0379522	up
MS.gene02570	3.02259	0.0380623	up
MS.gene72694	4.15626	0.0382843	up
MS.gene006563	2.48301	0.0382965	up
MS.gene059365	2.22506	0.0383638	up
MS.gene028597	2.42854	0.0389918	up
MS.gene37041	4.62698	0.039019	up
MS.gene054957	3.15384	0.0390311	up
MS.gene53795	2.55126	0.0391183	up
MS.gene039108	4.78573	0.0391664	up
MS.gene05439	3.40829	0.0392162	up
MS.gene40052	5.2622	0.0392937	up
MS.gene046792	2.11493	0.039321	up
MS.gene024053	2.31222	0.0394585	up
MS.gene028934	3.96684	0.0396743	up
MS.gene77074	2.70957	0.0399973	up
MS.gene84289	2.72131	0.0400913	up
MS.gene60198	3.74585	0.0402184	up
MS.gene27111	3.68786	0.0405669	up
MS.gene29694	2.49533	0.0405864	up
MS.gene09246	4.50378	0.0408337	up
MS.gene026015	2.98674	0.0411305	up
MS.gene051837	3.58162	0.0411926	up
MS.gene033163	3.95212	0.0411926	up
MS.gene84718	4.27468	0.0411926	up
MS.gene069613	3.68046	0.0413315	up
MS.gene90533	2.19367	0.0413385	up
MS.gene036232	3.43519	0.0414261	up
MS.gene024982	3.45406	0.0415073	up
MS.gene066519	2.17493	0.0415679	up
MS.gene49575	2.04202	0.0416071	up
MS.gene042116	2.04508	0.0416325	up
MS.gene28994	2.58691	0.0420226	up
MS.gene054437	3.56291	0.0422709	up
MS.gene93166	2.71187	0.0426005	up
MS.gene009521	2.45602	0.0428803	up
MS.gene012679	3.49887	0.0432001	up
MS.gene018076	3.40848	0.0432148	up
MS.gene067401	3.27402	0.0433277	up
MS.gene83224	2.90957	0.0433685	up
MS.gene61294	2.77137	0.0437112	up
MS.gene048066	2.09205	0.0437717	up
MS.gene007960	2.78197	0.0438796	up
MS.gene98705	2.61312	0.0440399	up
MS.gene89075	4.8673	0.0440555	up
MS.gene31785	2.17429	0.0440592	up
MS.gene59463	3.31753	0.0440937	up
MS.gene40000	3.26936	0.0441713	up
MS.gene053217	4.1778	0.0443574	up
MS.gene28498	2.28091	0.0444175	up
MS.gene39751	2.28227	0.0444329	up
MS.gene25624	2.55747	0.0444675	up
MS.gene77183	2.55973	0.0446483	up
MS.gene92675	2.76074	0.0448436	up
MS.gene96748	2.65502	0.0448705	up
MS.gene60227	2.12912	0.0449409	up
MS.gene00476	2.70717	0.0451754	up
MS.gene68298	3.38243	0.0451754	up
MS.gene28703	4.01203	0.0452063	up
MS.gene69904	3.11316	0.0453824	up
MS.gene062780	3.97206	0.045383	up
MS.gene069590	2.79183	0.0454574	up
MS.gene89665	3.42563	0.0454591	up
MS.gene56785	2.19077	0.0456153	up
MS.gene50190	2.32559	0.0459344	up
MS.gene91947	2.16652	0.0460665	up
MS.gene77068	2.62948	0.0461185	up
MS.gene004422	2.88248	0.0462237	up
MS.gene022787	2.39398	0.0463418	up
MS.gene67045	2.70751	0.046347	up
MS.gene064796	3.44133	0.0467969	up
MS.gene014797	2.83046	0.0470016	up
MS.gene92442	2.16404	0.0471173	up
MS.gene061353	4.09781	0.0474432	up
MS.gene26249	2.18854	0.0475251	up
MS.gene073206	2.50623	0.0478252	up
MS.gene83618	3.05538	0.0479117	up
MS.gene71995	2.95808	0.0480486	up
MS.gene82038	2.94812	0.0482273	up
MS.gene014005	3.06741	0.0484861	up
MS.gene044454	3.70392	0.0485193	up
MS.gene51171	3.7473	0.048613	up
MS.gene059936	2.33803	0.0486208	up
MS.gene039269	2.07616	0.0487467	up
MS.gene34071	2.57401	0.0488558	up
MS.gene96804	4.24924	0.0489376	up
MS.gene94256	2.1402	0.0489904	up
MS.gene046078	3.99858	0.0490425	up
MS.gene005533	2.21928	0.0490831	up
MS.gene75239	2.14096	0.0492972	up
MS.gene49844	6.07541	0.0493542	up
MS.gene53776	2.79798	0.0495658	up
MS.gene35333	3.06265	0.0496859	up
MS.gene060139	2.4621	0.049701	up
MS.gene071551	2.37886	0.0497521	up
MS.gene035698	4.52405	0.049923	up
MS.gene54327	2.16525	0.0499746	up
MS.gene030061	2.02639	0.0504398	up
MS.gene037951	4.45416	0.0505325	up
MS.gene32936	5.07351	0.0505934	up
MS.gene75466	3.9499	0.0506272	up
MS.gene009854	2.1357	0.0506434	up
MS.gene050630	3.86394	0.0506778	up
MS.gene067785	2.89442	0.0509871	up
MS.gene06537	2.2891	0.0510043	up
MS.gene49271	3.11164	0.0510134	up
MS.gene020565	4.08095	0.0511709	up
MS.gene61079	4.47591	0.0514107	up
MS.gene45114	3.61886	0.0514551	up
MS.gene015380	3.12295	0.0514845	up
MS.gene85143	4.79981	0.051741	up
MS.gene26683	4.14465	0.0519533	up
MS.gene69361	2.61806	0.0519637	up
MS.gene074341	2.41824	0.0521075	up
MS.gene031182	3.47106	0.0522013	up
MS.gene059765	2.02576	0.0523874	up
MS.gene20839	2.92117	0.0523898	up
MS.gene29496	2.93639	0.0524008	up
MS.gene07194	2.58228	0.0524999	up
MS.gene73622	2.31243	0.0526721	up
MS.gene55243	2.10112	0.0530256	up
MS.gene51611	4.24943	0.0530784	up
MS.gene63513	2.36847	0.0532082	up
MS.gene024203	2.08528	0.0532102	up
MS.gene23272	2.04863	0.0533306	up
MS.gene059776	3.59491	0.0534434	up
MS.gene66977	2.78258	0.0534434	up
MS.gene24363	3.37726	0.0534518	up
MS.gene59468	2.46306	0.0535765	up
MS.gene24853	2.41625	0.0537041	up
MS.gene73079	2.10466	0.0537231	up
MS.gene58304	3.43889	0.0537313	up
MS.gene79316	3.09051	0.0537374	up
MS.gene032092	2.06949	0.0539879	up
MS.gene67107	2.75221	0.0541113	up
MS.gene59453	3.4148	0.0541279	up
MS.gene84574	2.43336	0.0542197	up
MS.gene96835	2.48595	0.0543992	up
MS.gene046153	2.11283	0.054448	up
MS.gene70678	2.14888	0.0544931	up
MS.gene015522	4.52574	0.0546583	up
MS.gene70794	3.71361	0.0547377	up
MS.gene38335	2.95098	0.0548097	up
MS.gene003879	2.03363	0.0551038	up
MS.gene81522	2.5162	0.0552553	up
MS.gene84311	4.73277	0.0554467	up
MS.gene05627	2.01278	0.0560867	up
MS.gene037541	2.53356	0.0561793	up
MS.gene067008	3.34009	0.0566058	up
MS.gene59733	2.61238	0.0566483	up
MS.gene072520	2.80145	0.056747	up
MS.gene07873	2.47035	0.056747	up
MS.gene36870	3.16558	0.056747	up
MS.gene073393	2.83014	0.056802	up
MS.gene053685	3.68392	0.0569263	up
MS.gene79528	2.32764	0.0570565	up
MS.gene79835	2.97532	0.0574167	up
MS.gene61508	2.6042	0.0574221	up
MS.gene028815	3.59381	0.0574251	up
MS.gene051780	4.44452	0.0575495	up
MS.gene50973	2.40612	0.0582177	up
MS.gene85798	3.89427	0.0584967	up
MS.gene024708	5.92454	0.0587516	up
MS.gene64500	3.72498	0.0588062	up
MS.gene99910	4.26087	0.0588466	up
MS.gene78541	2.11361	0.0591305	up
MS.gene48835	5.78122	0.0595782	up
MS.gene041437	3.79847	0.0597125	up
MS.gene57519	2.3834	0.0597681	up
MS.gene20875	2.69951	0.0598844	up
MS.gene032799	2.01665	0.0600827	up
MS.gene02749	2.24391	0.0604393	up
MS.gene87758	3.83929	0.0604678	up
MS.gene044325	2.61417	0.060576	up
MS.gene030980	2.50983	0.0606717	up
MS.gene014116	2.23392	0.0608576	up
MS.gene70477	2.256	0.0609737	up
MS.gene06615	2.64107	0.0614886	up
MS.gene007865	2.98981	0.0616314	up
MS.gene005765	2.25548	0.0616879	up
MS.gene44409	2.65025	0.061734	up
MS.gene30996	4.22669	0.061755	up
MS.gene32061	3.14441	0.0619217	up
MS.gene39506	2.04326	0.0620104	up
MS.gene022897	2.0831	0.0621195	up
MS.gene57517	4.86686	0.0621371	up
MS.gene050731	4.30573	0.0624065	up
MS.gene029874	3.69089	0.0624528	up
MS.gene24752	4.84662	0.0625108	up
MS.gene052964	2.24033	0.0625451	up
MS.gene87757	2.05151	0.0626539	up
MS.gene78032	5.12061	0.0627244	up
MS.gene20149	2.32698	0.0627951	up
MS.gene030968	2.33367	0.0628685	up
MS.gene045535	3.71682	0.0629506	up
MS.gene066165	2.72566	0.0630051	up
MS.gene52775	2.35657	0.0632572	up
MS.gene97756	2.03669	0.0633122	up
MS.gene029242	2.47834	0.0634111	up
MS.gene070823	2.42066	0.0634464	up
MS.gene03438	2.53257	0.0634538	up
MS.gene035690	2.29638	0.0636084	up
MS.gene053648	2.74869	0.0637813	up
MS.gene87339	2.64011	0.0639549	up
MS.gene82940	2.81769	0.0641457	up
MS.gene45390	4.73457	0.0641879	up
MS.gene033416	6.20613	0.0642072	up
MS.gene81070	2.52272	0.0644188	up
MS.gene03005	2.11677	0.064717	up
MS.gene79328	2.95462	0.0647406	up
MS.gene010144	2.57255	0.0647779	up
MS.gene71753	3.3602	0.0648575	up
MS.gene60256	3.8661	0.0648627	up
MS.gene03804	4.22287	0.0651172	up
MS.gene89839	4.02196	0.0651692	up
MS.gene066166	3.41188	0.0652833	up
MS.gene45525	2.95575	0.0656791	up
MS.gene071410	4.87853	0.0656981	up
MS.gene92282	3.68682	0.0657377	up
MS.gene46063	3.77716	0.0657939	up
MS.gene57777	3.18873	0.0658383	up
MS.gene66339	2.01314	0.0658939	up
MS.gene047107	2.08499	0.0661388	up
MS.gene57515	4.29839	0.0663599	up
MS.gene36868	2.79396	0.0665615	up
MS.gene043355	4.50559	0.0668596	up
MS.gene78121	5.5363	0.0668596	up
MS.gene011901	2.65528	0.0669089	up
MS.gene88000	4.3254	0.0669089	up
MS.gene06299	2.33418	0.0672747	up
MS.gene24581	2.19331	0.0673576	up
MS.gene55785	3.48882	0.0673708	up
MS.gene31923	3.1479	0.0674503	up
MS.gene53857	2.38655	0.0674632	up
MS.gene028506	4.27251	0.0675292	up
MS.gene004682	3.02655	0.0677585	up
MS.gene054434	2.95922	0.0678631	up
MS.gene86387	2.07893	0.0679557	up
MS.gene056793	2.30974	0.0679968	up
MS.gene057233	3.32224	0.0681047	up
MS.gene89018	4.21769	0.0681652	up
MS.gene007893	2.49047	0.0682205	up
MS.gene014007	3.48481	0.0685584	up
MS.gene45387	2.45098	0.0689005	up
MS.gene013156	2.33988	0.0691038	up
MS.gene86968	2.39154	0.0692223	up
MS.gene64397	5.09941	0.0692929	up
MS.gene006782	2.07987	0.0694519	up
MS.gene073867	2.16808	0.0694915	up
MS.gene31721	2.34263	0.0697392	up
MS.gene055749	4.28321	0.0699324	up
MS.gene054233	5.81355	0.0706643	up
MS.gene029894	2.88083	0.0706678	up
MS.gene057267	3.31729	0.0707491	up
MS.gene25142	2.73084	0.0708567	up
MS.gene90010	2.78887	0.07093	up
MS.gene032313	2.58211	0.0709313	up
MS.gene062716	4.19813	0.0709514	up
MS.gene057147	2.14628	0.071021	up
MS.gene009292	2.89349	0.0710503	up
MS.gene072494	2.69169	0.0710503	up
MS.gene012989	2.01779	0.0713567	up
MS.gene050363	4.81033	0.0714453	up
MS.gene64416	4.49921	0.0715093	up
MS.gene035700	5.14761	0.0715281	up
MS.gene072708	4.72775	0.071682	up
MS.gene047425	2.13736	0.0716945	up
MS.gene019703	2.48444	0.07185	up
MS.gene013728	2.36081	0.0724859	up
MS.gene56725	2.07193	0.0728797	up
MS.gene70228	3.45965	0.0729229	up
MS.gene029245	3.56353	0.0731088	up
MS.gene89169	2.11506	0.0731203	up
MS.gene30845	2.36875	0.073282	up
MS.gene029439	2.66897	0.0733374	up
MS.gene048097	2.74774	0.073392	up
MS.gene017639	4.12809	0.0733957	up
MS.gene87046	3.92646	0.0734805	up
MS.gene058979	2.28057	0.0735005	up
MS.gene015151	2.16648	0.0737631	up
MS.gene31121	3.66574	0.0738752	up
MS.gene55505	2.03853	0.0738856	up
MS.gene031022	2.20607	0.0739181	up
MS.gene027611	2.25127	0.074149	up
MS.gene59411	2.02797	0.074216	up
MS.gene90198	2.6593	0.0743553	up
MS.gene44931	2.29337	0.0743972	up
MS.gene025152	3.41896	0.07465	up
MS.gene77715	4.63478	0.0746998	up
MS.gene79553	-2.24642	1.63058e-31	down
MS.gene047087	-4.69041	1.20103e-30	down
MS.gene36150	-3.1841	2.17256e-30	down
MS.gene021899	-3.95457	5.21615e-24	down
MS.gene021748	-2.08415	1.26647e-23	down
MS.gene010830	-3.2669	1.26647e-23	down
MS.gene002171	-4.62969	1.85835e-21	down
MS.gene010726	-5.61852	2.88727e-21	down
MS.gene91619	-3.42659	6.77343e-21	down
MS.gene069417	-4.06602	6.80899e-21	down
MS.gene009005	-5.12632	1.04345e-19	down
MS.gene79795	-2.11142	3.4066e-19	down
MS.gene048247	-4.32364	1.63283e-18	down
MS.gene023072	-3.70062	1.63283e-18	down
MS.gene48372	-3.77589	4.60432e-17	down
MS.gene049399	-6.70888	1.36744e-16	down
MS.gene83460	-12.3688	3.07721e-15	down
MS.gene71192	-6.94246	3.07721e-15	down
MS.gene45871	-3.93654	3.84368e-15	down
MS.gene60448	-6.52779	4.8082e-15	down
MS.gene23156	-3.74133	2.12403e-14	down
MS.gene013428	-6.32463	3.08514e-14	down
MS.gene01140	-4.17363	3.68086e-14	down
MS.gene85573	-2.68275	3.93188e-14	down
MS.gene016602	-3.73407	9.74715e-14	down
MS.gene60677	-2.29542	1.05175e-13	down
MS.gene018268	-6.88373	1.77478e-13	down
MS.gene36009	-4.09945	1.79432e-13	down
MS.gene56871	-4.08825	1.94668e-13	down
MS.gene019377	-10.3885	2.75747e-13	down
MS.gene038442	-5.42898	2.8207e-13	down
MS.gene011016	-3.88948	4.34772e-13	down
MS.gene002964	-2.59234	4.51702e-13	down
MS.gene028135	-9.93264	5.2394e-13	down
MS.gene027509	-5.21413	5.45156e-13	down
MS.gene60710	-2.72475	5.69356e-13	down
MS.gene051256	-3.55582	6.79558e-13	down
MS.gene062941	-4.44214	7.10716e-13	down
MS.gene049534	-5.97574	9.30181e-13	down
MS.gene44622	-4.22801	1.60791e-12	down
MS.gene73493	-2.36641	2.49122e-12	down
MS.gene045626	-5.81641	2.65444e-12	down
MS.gene51043	-5.29355	3.54762e-12	down
MS.gene20364	-4.98081	4.59169e-12	down
MS.gene52552	-3.21089	5.73318e-12	down
MS.gene044317	-2.86388	1.60928e-11	down
MS.gene68985	-5.10703	2.55419e-11	down
MS.gene48293	-5.66949	3.38716e-11	down
MS.gene049398	-9.36912	5.17998e-11	down
MS.gene019971	-2.59076	6.83123e-11	down
MS.gene013424	-2.53527	6.95481e-11	down
MS.gene033327	-6.77715	8.90498e-11	down
MS.gene47726	-2.72414	9.2196e-11	down
MS.gene57024	-4.79507	9.6955e-11	down
MS.gene63788	-2.41228	1.12182e-10	down
MS.gene50689	-3.9433	1.30673e-10	down
MS.gene06528	-6.80926	1.87795e-10	down
MS.gene20683	-4.5006	2.04113e-10	down
MS.gene02382	-2.59971	2.21427e-10	down
MS.gene78995	-5.15637	2.55599e-10	down
MS.gene54776	-3.57705	3.01354e-10	down
MS.gene30928	-6.33834	3.12231e-10	down
MS.gene039312	-2.62812	3.42568e-10	down
MS.gene77896	-2.28592	3.5502e-10	down
MS.gene059969	-7.98069	5.92267e-10	down
MS.gene036717	-9.3719	5.93781e-10	down
MS.gene035175	-2.92901	6.07384e-10	down
MS.gene062233	-2.51435	7.0805e-10	down
MS.gene55263	-5.7848	7.0805e-10	down
MS.gene003632	-7.29668	8.64858e-10	down
MS.gene24039	-5.25524	1.21053e-09	down
MS.gene052010	-2.96375	1.24381e-09	down
MS.gene038443	-4.29583	1.30787e-09	down
MS.gene49918	-5.55135	1.48978e-09	down
MS.gene80488	-4.38435	1.74978e-09	down
MS.gene39131	-4.84536	1.81826e-09	down
MS.gene99506	-4.25385	2.06058e-09	down
MS.gene24297	-2.302	2.17192e-09	down
MS.gene007684	-2.25584	2.19738e-09	down
MS.gene020837	-3.64057	2.56088e-09	down
MS.gene91190	-2.38728	3.3895e-09	down
MS.gene49382	-3.01614	4.60057e-09	down
MS.gene036194	-2.87717	4.7568e-09	down
MS.gene85481	-5.36747	4.76815e-09	down
MS.gene39858	-2.01252	5.20305e-09	down
MS.gene58966	-2.74983	5.2696e-09	down
MS.gene20363	-3.96776	5.44381e-09	down
MS.gene015498	-5.45491	5.66385e-09	down
MS.gene95677	-4.46934	6.67311e-09	down
MS.gene030489	-7.45092	7.03603e-09	down
MS.gene48478	-2.04829	7.78409e-09	down
MS.gene023269	-3.21138	7.84133e-09	down
MS.gene060346	-9.22232	7.9025e-09	down
MS.gene018135	-6.02413	9.1565e-09	down
MS.gene034353	-2.5195	9.27079e-09	down
MS.gene009144	-2.06762	1.01101e-08	down
MS.gene004130	-2.47028	1.0344e-08	down
MS.gene042579	-3.33927	1.04395e-08	down
MS.gene028617	-4.91382	1.25202e-08	down
MS.gene049396	-2.13405	1.26133e-08	down
MS.gene37008	-2.77684	1.38414e-08	down
MS.gene74685	-4.03448	1.38414e-08	down
MS.gene021410	-2.19301	1.39268e-08	down
MS.gene037436	-3.49294	1.63362e-08	down
MS.gene67442	-6.65575	1.89895e-08	down
MS.gene004947	-4.33448	1.92338e-08	down
MS.gene91862	-2.27888	2.18166e-08	down
MS.gene024393	-3.49232	2.18914e-08	down
MS.gene030079	-2.74242	3.09129e-08	down
MS.gene062486	-7.41112	3.26659e-08	down
MS.gene73104	-2.84998	3.42348e-08	down
MS.gene038263	-2.87428	3.48617e-08	down
MS.gene43831	-5.06341	3.57225e-08	down
MS.gene97324	-2.65146	3.60033e-08	down
MS.gene34964	-4.20702	3.70352e-08	down
MS.gene08872	-5.43565	3.888e-08	down
MS.gene070561	-2.58733	4.38065e-08	down
MS.gene000518	-6.44601	4.46745e-08	down
MS.gene40251	-2.96474	4.55741e-08	down
MS.gene38451	-6.54692	4.96702e-08	down
MS.gene74338	-2.68897	5.1863e-08	down
MS.gene69749	-2.37004	5.32572e-08	down
MS.gene97717	-2.1144	5.62166e-08	down
MS.gene072863	-2.12262	6.2721e-08	down
MS.gene08985	-2.08735	6.83506e-08	down
MS.gene37194	-7.28174	6.85556e-08	down
MS.gene72472	-3.79326	7.2317e-08	down
MS.gene007747	-2.41725	7.45045e-08	down
MS.gene58905	-2.25289	7.45045e-08	down
MS.gene02433	-2.03428	7.61896e-08	down
MS.gene50692	-6.25887	7.86242e-08	down
MS.gene35783	-3.38194	7.88603e-08	down
MS.gene37993	-3.89718	7.88603e-08	down
MS.gene022097	-4.6336	8.0511e-08	down
MS.gene74638	-2.76566	8.0511e-08	down
MS.gene33451	-5.52309	8.50927e-08	down
MS.gene065540	-2.26119	8.51249e-08	down
MS.gene049759	-2.3384	8.71132e-08	down
MS.gene31685	-2.33578	9.83739e-08	down
MS.gene45150	-5.20604	1.01427e-07	down
MS.gene064902	-2.00089	1.06573e-07	down
MS.gene09645	-2.70443	1.13125e-07	down
MS.gene98047	-2.9037	1.1678e-07	down
MS.gene08350	-3.7104	1.20701e-07	down
MS.gene46959	-5.62419	1.2233e-07	down
MS.gene016779	-2.61498	1.26805e-07	down
MS.gene56341	-4.78446	1.37243e-07	down
MS.gene65899	-3.89559	1.37243e-07	down
MS.gene72667	-3.28013	1.4349e-07	down
MS.gene63447	-6.52072	1.47623e-07	down
MS.gene22514	-3.83323	1.50649e-07	down
MS.gene26244	-2.67524	1.5721e-07	down
MS.gene86153	-2.17195	1.57241e-07	down
MS.gene66956	-3.43589	1.57241e-07	down
MS.gene004431	-2.4364	1.61192e-07	down
MS.gene38257	-3.53846	1.72306e-07	down
MS.gene01027	-2.30356	1.83954e-07	down
MS.gene03710	-2.47603	1.867e-07	down
MS.gene61586	-4.4204	2.0537e-07	down
MS.gene029672	-3.16341	2.21479e-07	down
MS.gene044121	-2.49017	2.53768e-07	down
MS.gene067741	-2.8803	2.54892e-07	down
MS.gene017208	-2.44852	2.84233e-07	down
MS.gene065081	-3.82458	2.90088e-07	down
MS.gene70483	-2.79788	3.21316e-07	down
MS.gene038638	-3.54526	3.35369e-07	down
MS.gene48014	-2.80575	3.38687e-07	down
MS.gene016799	-2.23912	3.58321e-07	down
MS.gene48018	-2.71139	3.66818e-07	down
MS.gene91761	-10.065	3.68377e-07	down
MS.gene51135	-6.4766	3.71742e-07	down
MS.gene36314	-3.77904	4.35411e-07	down
MS.gene20063	-3.55869	4.58631e-07	down
MS.gene018353	-6.14618	4.73729e-07	down
MS.gene83193	-2.19301	4.92447e-07	down
MS.gene33484	-3.93536	5.03434e-07	down
MS.gene03009	-3.95172	5.04278e-07	down
MS.gene020932	-3.96774	5.09222e-07	down
MS.gene98727	-2.51433	5.10717e-07	down
MS.gene82304	-7.45746	5.20821e-07	down
MS.gene054486	-2.57996	5.2528e-07	down
MS.gene20757	-6.57735	5.81353e-07	down
MS.gene99339	-3.77244	6.05258e-07	down
MS.gene002668	-4.85305	6.21376e-07	down
MS.gene98050	-3.14299	6.22633e-07	down
MS.gene015502	-3.17871	6.33505e-07	down
MS.gene003630	-4.38774	6.33505e-07	down
MS.gene33704	-3.98112	6.48435e-07	down
MS.gene037528	-2.68477	6.5682e-07	down
MS.gene84826	-2.41482	6.59321e-07	down
MS.gene69688	-8.02963	6.81466e-07	down
MS.gene052719	-8.46582	6.88054e-07	down
MS.gene20415	-2.07232	6.88054e-07	down
MS.gene004751	-2.29917	7.9758e-07	down
MS.gene22010	-2.91979	8.00912e-07	down
MS.gene39949	-2.78535	8.24579e-07	down
MS.gene017249	-2.9823	8.30797e-07	down
MS.gene95441	-4.49589	9.18064e-07	down
MS.gene20557	-2.56049	9.24818e-07	down
MS.gene90112	-3.17155	9.3528e-07	down
MS.gene023958	-3.39471	9.48663e-07	down
MS.gene35782	-4.46498	9.57123e-07	down
MS.gene85939	-3.85268	9.77431e-07	down
MS.gene07479	-4.01369	9.97079e-07	down
MS.gene43394	-4.77607	1.02567e-06	down
MS.gene06527	-7.26113	1.04146e-06	down
MS.gene044994	-6.11391	1.04391e-06	down
MS.gene015067	-7.12162	1.05462e-06	down
MS.gene044193	-2.44385	1.09673e-06	down
MS.gene83067	-2.20055	1.10066e-06	down
MS.gene071952	-3.9727	1.12573e-06	down
MS.gene67201	-4.0234	1.15216e-06	down
MS.gene74399	-6.12332	1.195e-06	down
MS.gene059545	-2.17458	1.23389e-06	down
MS.gene018312	-2.0147	1.28096e-06	down
MS.gene043468	-7.44335	1.30423e-06	down
MS.gene043165	-3.59754	1.30637e-06	down
MS.gene91609	-2.64437	1.33123e-06	down
MS.gene51448	-2.87601	1.35904e-06	down
MS.gene004521	-4.8854	1.37761e-06	down
MS.gene77482	-2.82636	1.42917e-06	down
MS.gene05296	-4.44369	1.45703e-06	down
MS.gene061507	-4.5927	1.47775e-06	down
MS.gene045067	-3.37395	1.56672e-06	down
MS.gene66183	-2.82466	1.58357e-06	down
MS.gene08832	-2.20667	1.64042e-06	down
MS.gene29014	-2.03938	1.73652e-06	down
MS.gene005405	-4.51131	1.75729e-06	down
MS.gene048059	-2.02273	1.82756e-06	down
MS.gene53056	-5.53078	1.8626e-06	down
MS.gene24152	-4.74365	1.8626e-06	down
MS.gene020274	-4.92725	2.18872e-06	down
MS.gene54352	-4.16316	2.28957e-06	down
MS.gene029037	-5.39732	2.30252e-06	down
MS.gene09135	-2.62153	2.40397e-06	down
MS.gene82708	-2.01763	2.50962e-06	down
MS.gene06771	-5.66788	2.5458e-06	down
MS.gene051702	-4.64126	2.64436e-06	down
MS.gene45958	-2.42776	2.64436e-06	down
MS.gene08634	-4.86436	2.69146e-06	down
MS.gene32137	-3.1638	2.72212e-06	down
MS.gene41519	-4.71842	2.72494e-06	down
MS.gene98048	-2.46401	2.78164e-06	down
MS.gene30733	-2.08221	2.9356e-06	down
MS.gene003623	-4.21379	3.06766e-06	down
MS.gene034511	-2.05399	3.09576e-06	down
MS.gene63458	-2.69479	3.09714e-06	down
MS.gene010540	-2.80415	3.21454e-06	down
MS.gene60991	-4.47481	3.26177e-06	down
MS.gene32983	-2.05566	3.38897e-06	down
MS.gene004875	-3.8546	3.4681e-06	down
MS.gene041942	-2.06587	3.63235e-06	down
MS.gene22581	-3.18593	3.73521e-06	down
MS.gene41276	-3.71625	3.86151e-06	down
MS.gene015501	-5.19906	3.88144e-06	down
MS.gene006455	-4.19014	3.96012e-06	down
MS.gene007660	-5.23497	4.0636e-06	down
MS.gene069000	-4.44822	4.08189e-06	down
MS.gene061718	-2.04839	4.23728e-06	down
MS.gene013182	-4.99954	4.38777e-06	down
MS.gene025755	-2.08381	4.45697e-06	down
MS.gene052407	-6.93519	4.45697e-06	down
MS.gene039339	-3.01028	4.50294e-06	down
MS.gene011367	-5.28895	4.5629e-06	down
MS.gene47360	-6.09545	5.03072e-06	down
MS.gene24969	-3.32915	5.1664e-06	down
MS.gene39957	-6.77944	5.18266e-06	down
MS.gene032179	-2.34227	5.41529e-06	down
MS.gene79788	-4.12964	5.43369e-06	down
MS.gene060018	-3.06787	5.54916e-06	down
MS.gene015744	-2.06358	5.56282e-06	down
MS.gene48015	-2.58368	5.57932e-06	down
MS.gene33187	-5.89247	5.59587e-06	down
MS.gene43857	-2.44632	5.75924e-06	down
MS.gene038262	-2.49871	6.25289e-06	down
MS.gene065217	-3.77385	6.29011e-06	down
MS.gene071035	-4.12559	6.29861e-06	down
MS.gene055036	-2.37348	6.34533e-06	down
MS.gene061400	-6.35882	6.34533e-06	down
MS.gene66419	-2.42397	6.39225e-06	down
MS.gene005652	-4.28761	6.61202e-06	down
MS.gene96020	-2.75117	6.68199e-06	down
MS.gene064640	-2.38266	6.844e-06	down
MS.gene044995	-4.85006	6.88456e-06	down
MS.gene72386	-4.99876	7.00284e-06	down
MS.gene76620	-4.60349	7.01702e-06	down
MS.gene029038	-3.73861	7.05758e-06	down
MS.gene66109	-2.08403	7.15259e-06	down
MS.gene013427	-7.96488	7.3584e-06	down
MS.gene97835	-3.84389	7.73446e-06	down
MS.gene016000	-5.01827	8.33103e-06	down
MS.gene035495	-4.03565	8.33103e-06	down
MS.gene45858	-3.45491	8.44315e-06	down
MS.gene79848	-3.0427	8.60123e-06	down
MS.gene055533	-3.80385	9.57599e-06	down
MS.gene025508	-2.4255	9.77822e-06	down
MS.gene73273	-2.04546	9.82354e-06	down
MS.gene052744	-3.32554	1.00802e-05	down
MS.gene20365	-6.81706	1.02268e-05	down
MS.gene050133	-5.24934	1.03428e-05	down
MS.gene045074	-2.57885	1.0637e-05	down
MS.gene021323	-4.51634	1.0694e-05	down
MS.gene42340	-3.55241	1.07215e-05	down
MS.gene068902	-2.02648	1.07741e-05	down
MS.gene72456	-3.13851	1.0843e-05	down
MS.gene61067	-6.45008	1.08599e-05	down
MS.gene99462	-2.02431	1.09371e-05	down
MS.gene028856	-7.81194	1.12123e-05	down
MS.gene008794	-2.12088	1.12123e-05	down
MS.gene052299	-2.00258	1.13146e-05	down
MS.gene61772	-5.79044	1.14236e-05	down
MS.gene91246	-3.50308	1.18429e-05	down
MS.gene039231	-2.39918	1.19827e-05	down
MS.gene37159	-3.05217	1.23261e-05	down
MS.gene062141	-5.46474	1.23567e-05	down
MS.gene82097	-3.49661	1.24756e-05	down
MS.gene025316	-5.68347	1.25711e-05	down
MS.gene28678	-3.516	1.27901e-05	down
MS.gene58870	-4.06755	1.29712e-05	down
MS.gene012420	-5.15762	1.31899e-05	down
MS.gene004292	-4.81041	1.33547e-05	down
MS.gene65233	-2.80584	1.36513e-05	down
MS.gene65837	-5.51946	1.39079e-05	down
MS.gene044595	-2.97152	1.40761e-05	down
MS.gene061632	-4.19644	1.42663e-05	down
MS.gene041778	-3.20616	1.42663e-05	down
MS.gene82869	-3.15121	1.5389e-05	down
MS.gene05924	-2.05144	1.55728e-05	down
MS.gene013447	-2.74072	1.55728e-05	down
MS.gene51706	-4.29537	1.59787e-05	down
MS.gene020608	-2.72975	1.6214e-05	down
MS.gene54333	-4.68589	1.66052e-05	down
MS.gene034941	-5.66954	1.72019e-05	down
MS.gene062942	-4.30883	1.73651e-05	down
MS.gene35710	-2.52284	1.79177e-05	down
MS.gene61247	-4.38005	1.79177e-05	down
MS.gene03008	-4.33381	1.86229e-05	down
MS.gene06255	-3.56078	1.88154e-05	down
MS.gene77328	-2.17063	1.88993e-05	down
MS.gene000100	-2.07465	1.95617e-05	down
MS.gene045407	-3.49469	1.95617e-05	down
MS.gene031837	-2.07782	2.09947e-05	down
MS.gene83576	-2.7422	2.1171e-05	down
MS.gene029464	-2.11042	2.14112e-05	down
MS.gene73930	-3.04117	2.18663e-05	down
MS.gene07161	-4.51373	2.22163e-05	down
MS.gene002274	-2.2397	2.22818e-05	down
MS.gene66179	-2.33093	2.22818e-05	down
MS.gene015614	-2.03687	2.22818e-05	down
MS.gene27647	-2.19374	2.22818e-05	down
MS.gene53126	-3.28084	2.22841e-05	down
MS.gene92683	-2.17743	2.23995e-05	down
MS.gene86349	-2.80717	2.24362e-05	down
MS.gene022567	-2.79051	2.25745e-05	down
MS.gene017755	-3.5059	2.36946e-05	down
MS.gene69620	-2.98081	2.37883e-05	down
MS.gene061919	-2.38626	2.4209e-05	down
MS.gene53681	-4.78118	2.42373e-05	down
MS.gene34686	-3.46013	2.5148e-05	down
MS.gene049533	-4.67733	2.60405e-05	down
MS.gene23973	-3.07542	2.66432e-05	down
MS.gene070112	-2.92541	2.67643e-05	down
MS.gene06524	-2.1721	2.67732e-05	down
MS.gene56746	-2.7541	2.7501e-05	down
MS.gene029878	-2.23175	2.77098e-05	down
MS.gene050692	-3.34908	2.83156e-05	down
MS.gene80275	-2.79076	2.83849e-05	down
MS.gene070746	-2.06263	2.83926e-05	down
MS.gene37416	-4.03673	2.88595e-05	down
MS.gene011354	-2.35382	2.97605e-05	down
MS.gene00177	-2.3985	3.01098e-05	down
MS.gene062256	-3.06298	3.01399e-05	down
MS.gene64533	-3.49621	3.05142e-05	down
MS.gene021705	-4.64911	3.09013e-05	down
MS.gene009070	-8.12603	3.09291e-05	down
MS.gene011682	-2.66915	3.13282e-05	down
MS.gene55865	-3.56891	3.15222e-05	down
MS.gene030805	-2.24128	3.15419e-05	down
MS.gene024390	-3.55339	3.17177e-05	down
MS.gene029484	-2.36556	3.17659e-05	down
MS.gene00178	-2.76744	3.23511e-05	down
MS.gene81550	-2.11763	3.27161e-05	down
MS.gene31519	-2.22739	3.28033e-05	down
MS.gene94104	-2.90845	3.32374e-05	down
MS.gene045607	-2.73689	3.32614e-05	down
MS.gene52238	-2.94068	3.3382e-05	down
MS.gene004720	-3.98593	3.39529e-05	down
MS.gene014354	-2.22051	3.42785e-05	down
MS.gene031498	-2.696	3.46323e-05	down
MS.gene018229	-3.05649	3.47812e-05	down
MS.gene000234	-2.92924	3.5281e-05	down
MS.gene33576	-5.11441	3.55055e-05	down
MS.gene052408	-6.68243	3.57636e-05	down
[truncated: 2,045 more rows]
